# Supplementary material for: Mild electrophilic trifluoromethylthiolation of ketones with trifluoromethanesulfanamide
Source: Royal Society of Chemistry journal article supplement (doi:10.1039/c5ob00960j), 2015-01-01

# Supporting Information

## Mild electrophilic trifluoromethylthiolation of ketones with trifluoromethanesulfanamide

Wei Wu, Xuxue Zhang, Fang Liang, and Song Cao\*

Shanghai Key Laboratory of Chemical Biology, School of Pharmacy, East China University of  
Science and Technology (*ECUST*), Shanghai 200237, China

\*Corresponding author. Tel: +86-21-64253452; fax: +86-21-64252603,

E-mail address: [scao@ecust.edu.cn](mailto:scao@ecust.edu.cn)

### Table of Contents

|             |                                                                                                              |                |
|-------------|--------------------------------------------------------------------------------------------------------------|----------------|
| <b>I.</b>   | <sup>1</sup> H, <sup>13</sup> C, <sup>19</sup> F NMR and HRMS(EI) spectra of compounds <b>3a-z</b> .....     | <b>S2-S52</b>  |
| <b>II.</b>  | <sup>1</sup> H, <sup>13</sup> C, <sup>19</sup> F NMR and HRMS(EI) spectra of compounds <b>3d', 3h'</b> ..... | <b>S53-S56</b> |
| <b>III.</b> | <sup>1</sup> H, <sup>13</sup> C, <sup>19</sup> F NMR and HRMS(EI) spectra of compound <b>4</b> .....         | <b>S57-S58</b> |
| <b>IV.</b>  | <sup>1</sup> H, <sup>13</sup> C, <sup>19</sup> F NMR and HRMS(EI) spectra of compound <b>5</b> .....         | <b>S59-S60</b> |

<sup>1</sup>H, <sup>13</sup>C, <sup>19</sup>F NMR and HRMS(EI) spectra of compounds

<sup>1</sup>H NMR spectra of **3a**

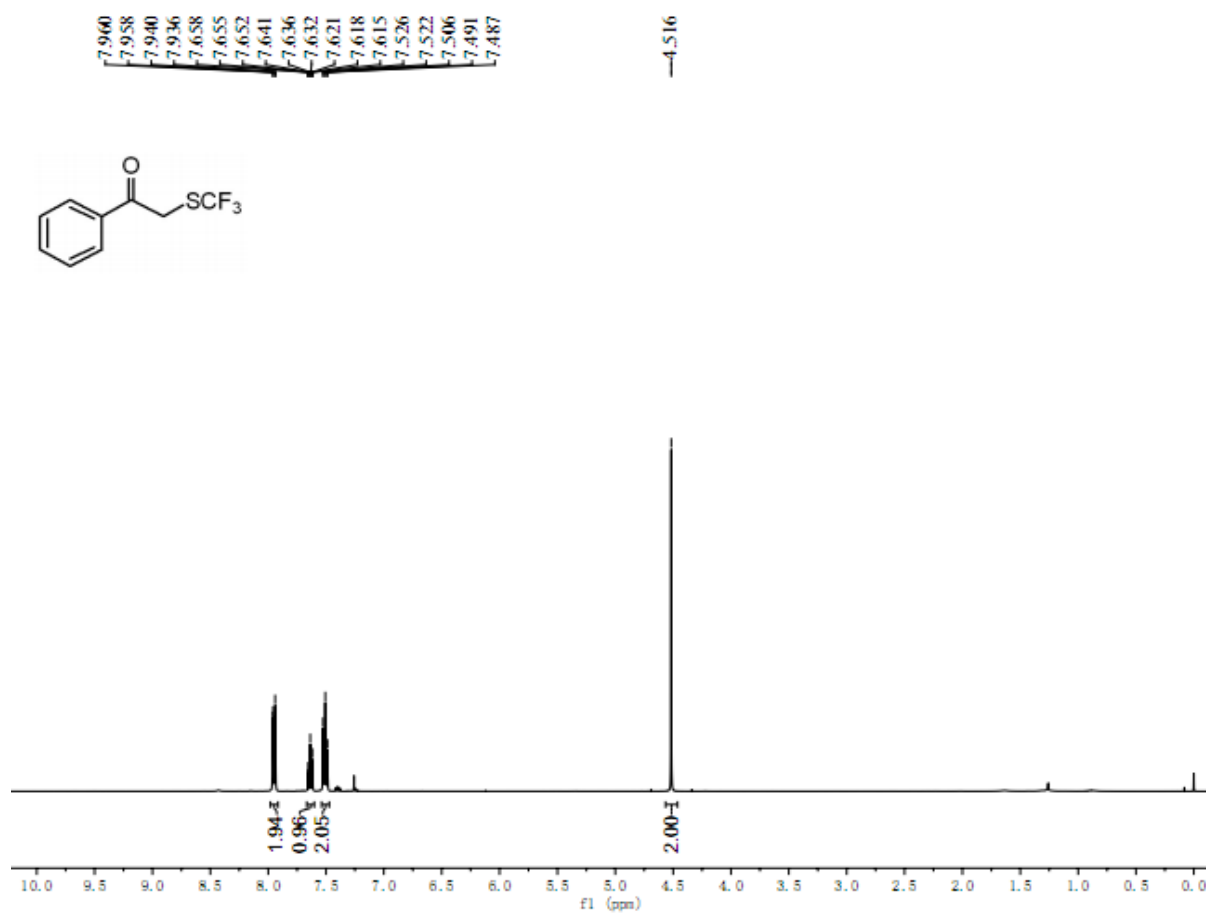

<sup>13</sup>C NMR spectra of **3a**

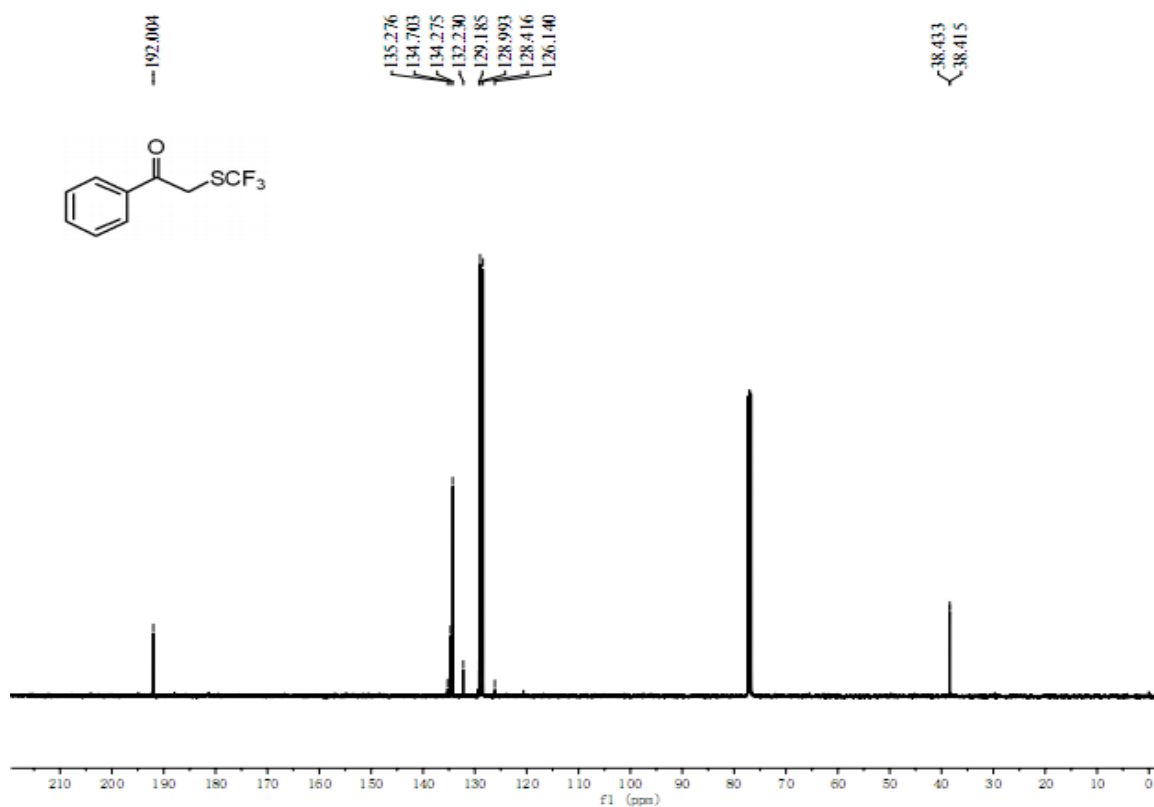

<sup>19</sup>F NMR spectra of **3a**

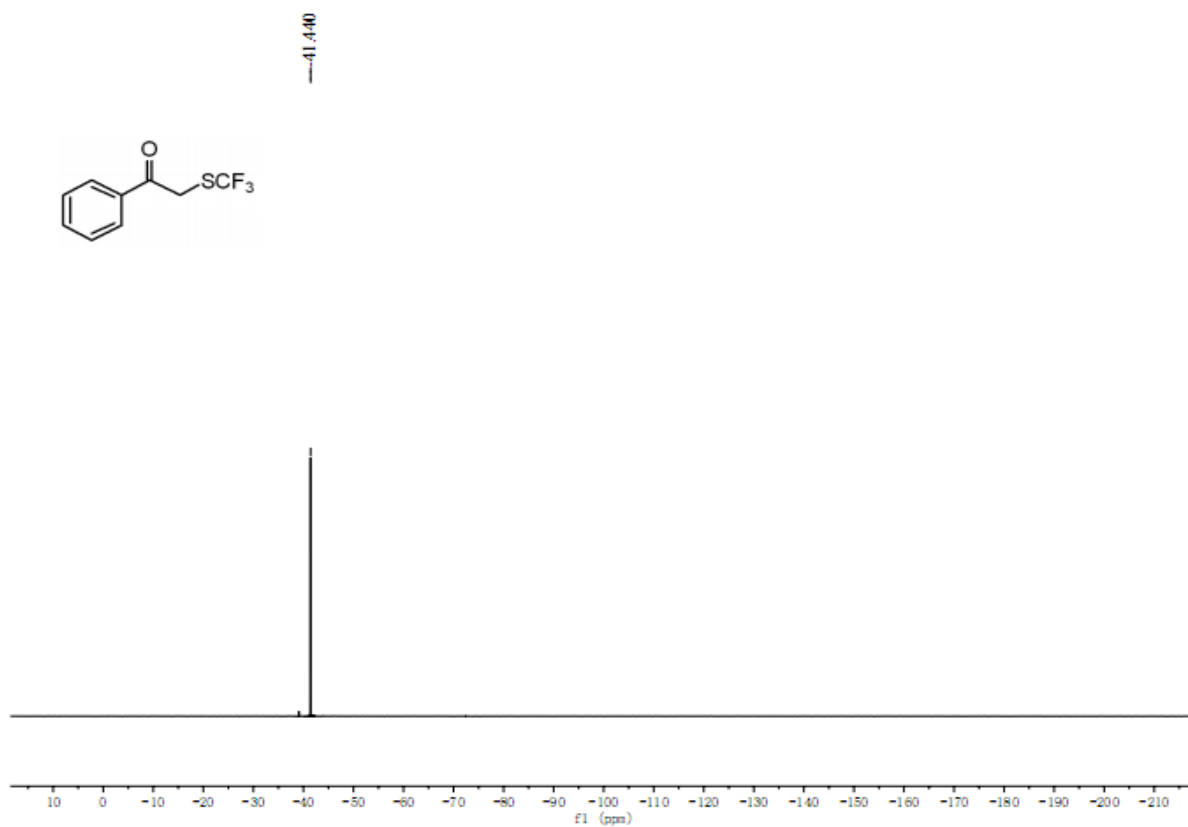

<sup>1</sup>H NMR spectra of **3b**

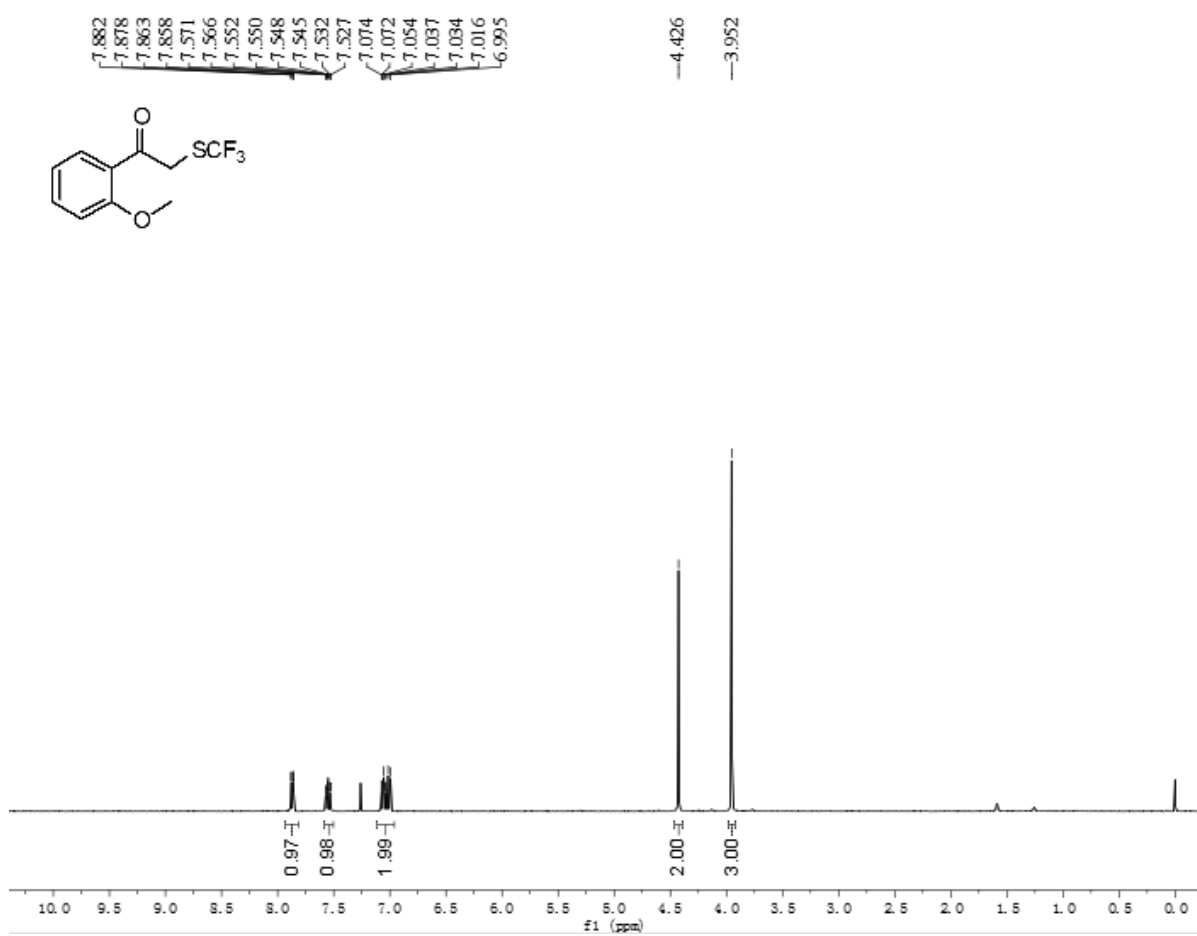

<sup>13</sup>C NMR spectra of **3b**

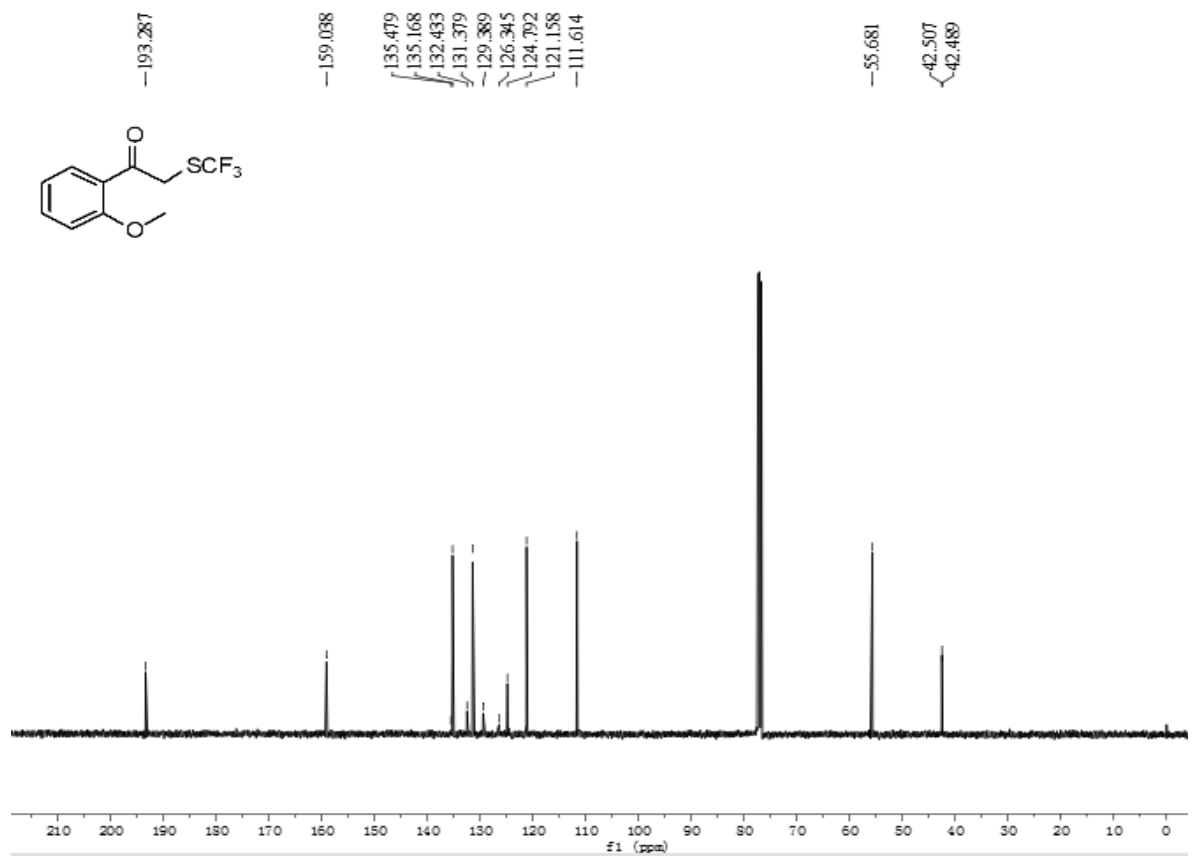

<sup>19</sup>F NMR spectra of **3b**

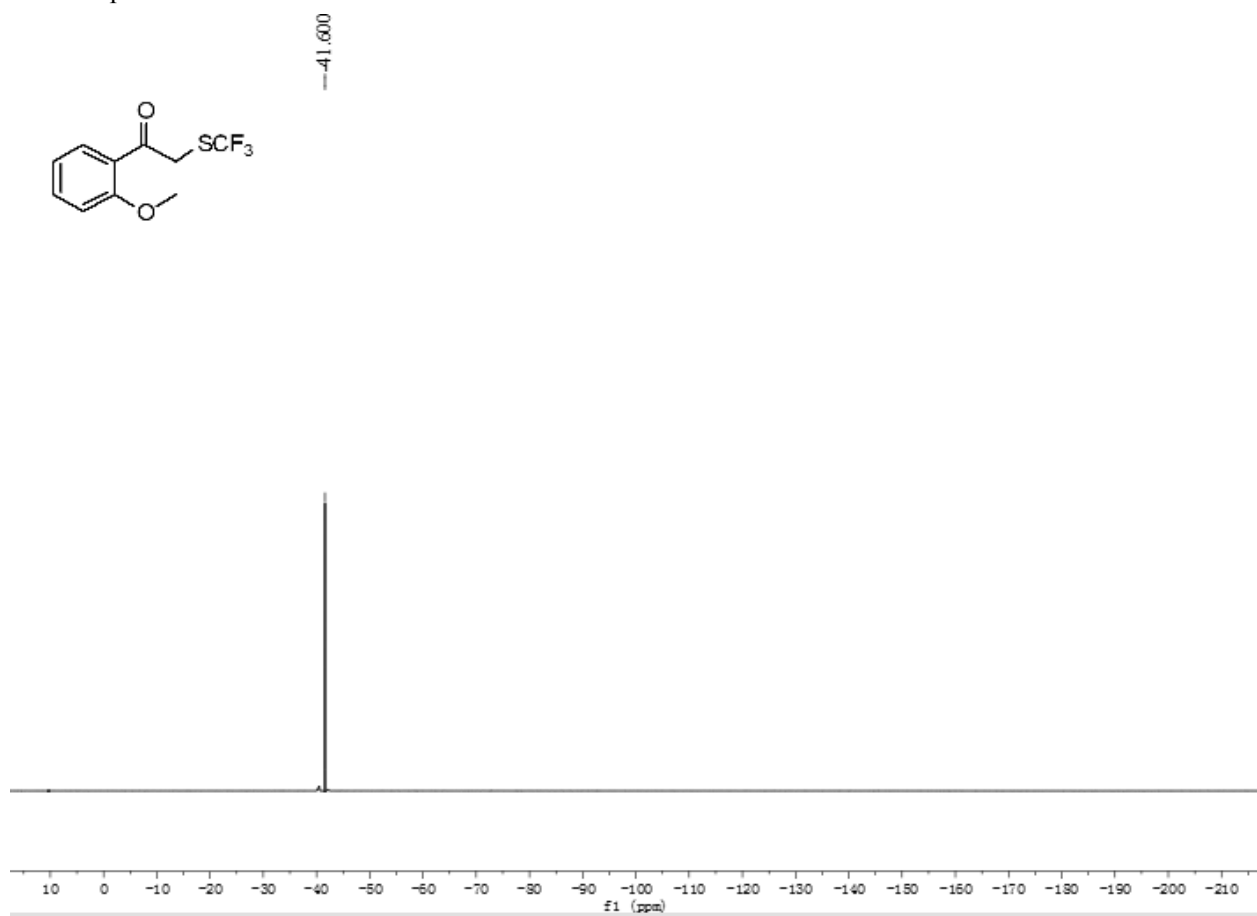

<sup>1</sup>H NMR spectra of **3c**

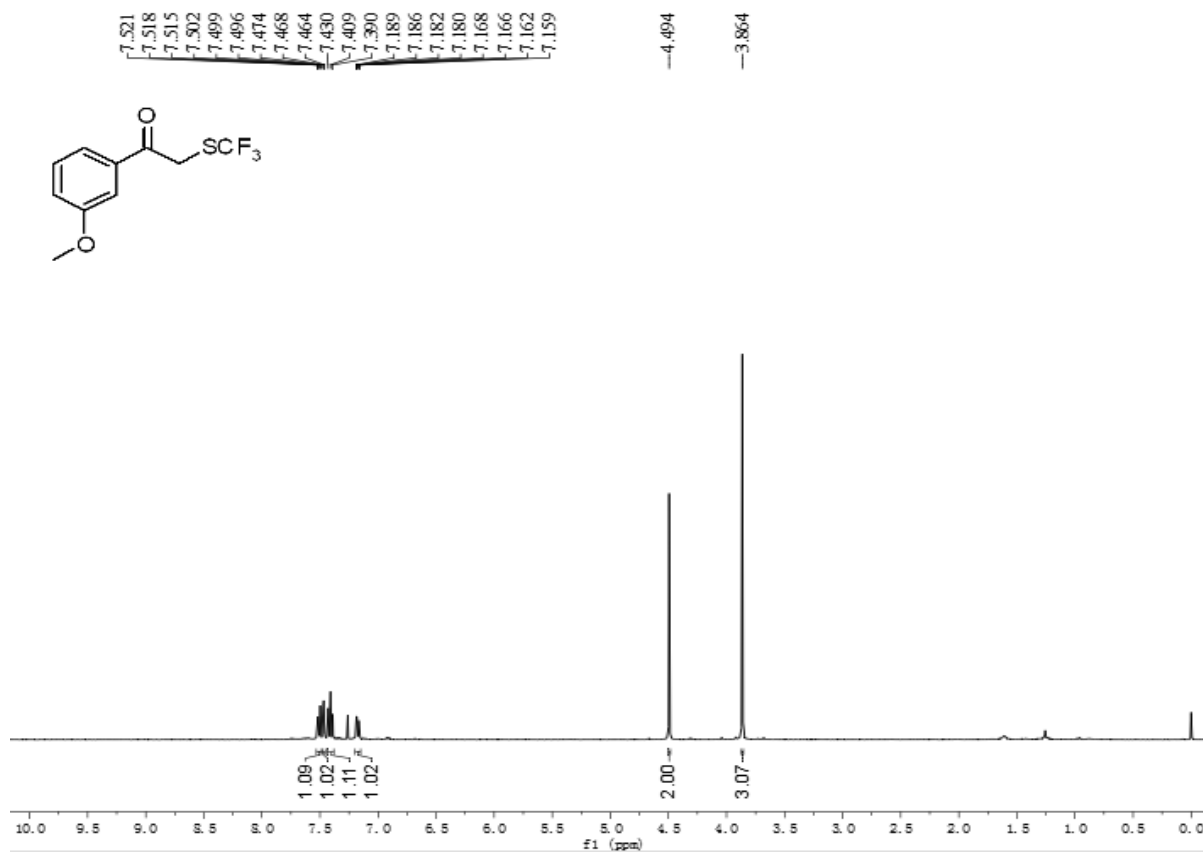

<sup>13</sup>C NMR spectra of **3c**

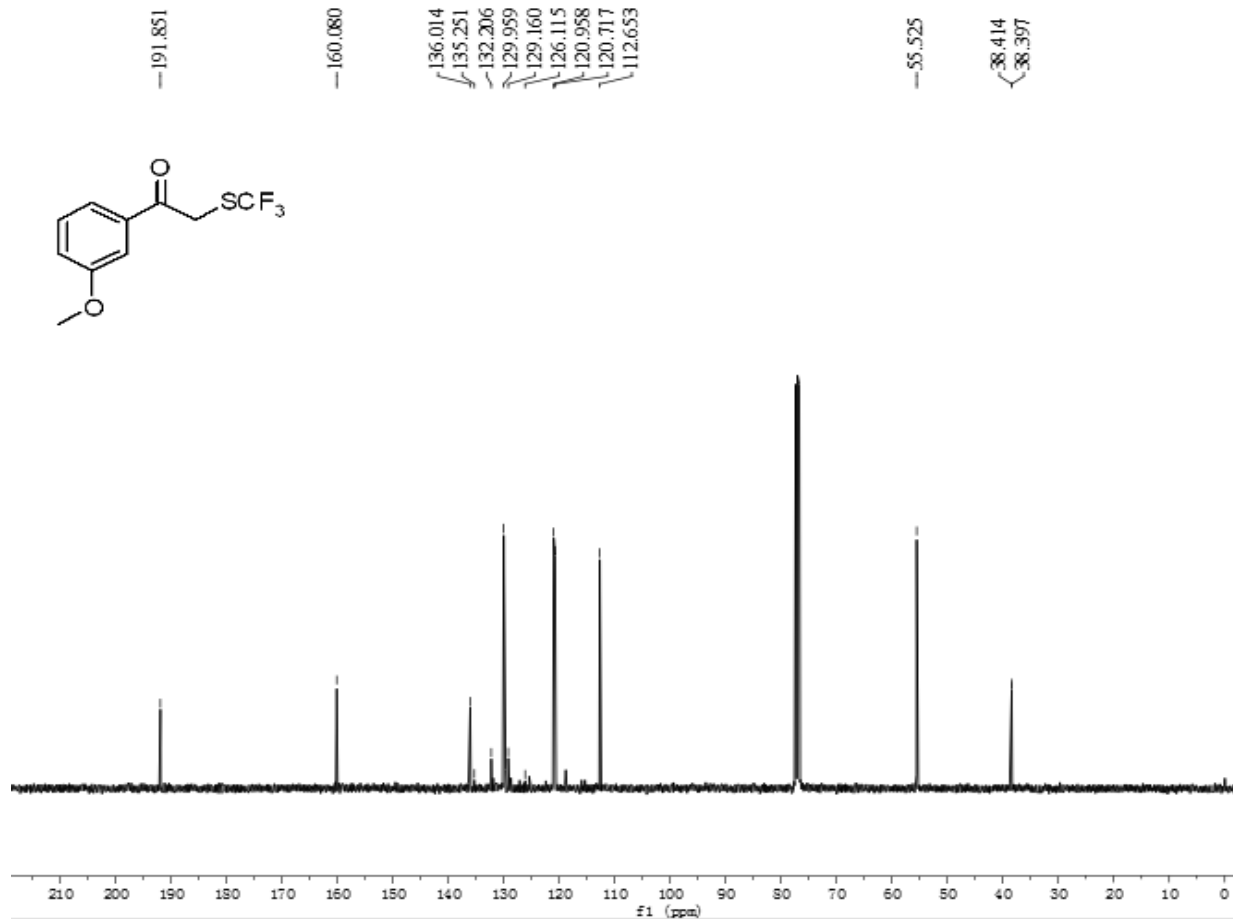

<sup>19</sup>F NMR spectra of **3c**

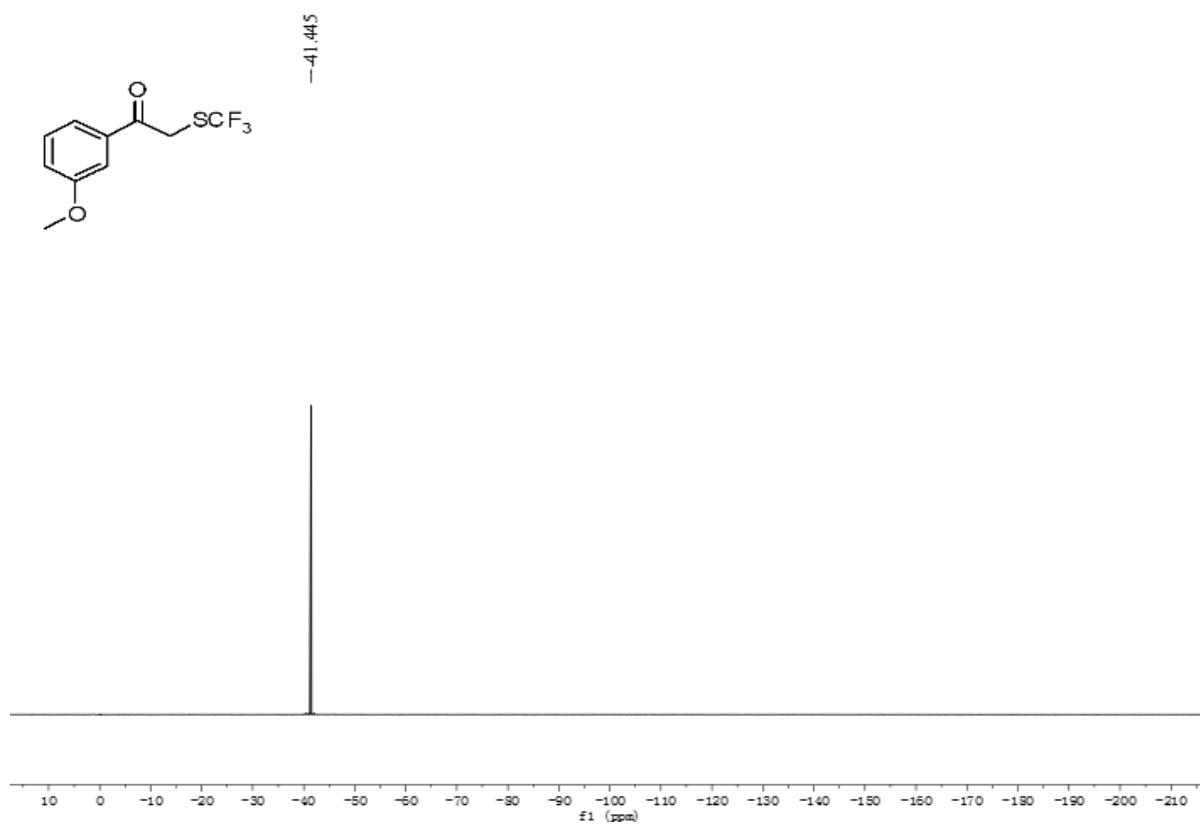

<sup>1</sup>H NMR spectra of **3d**

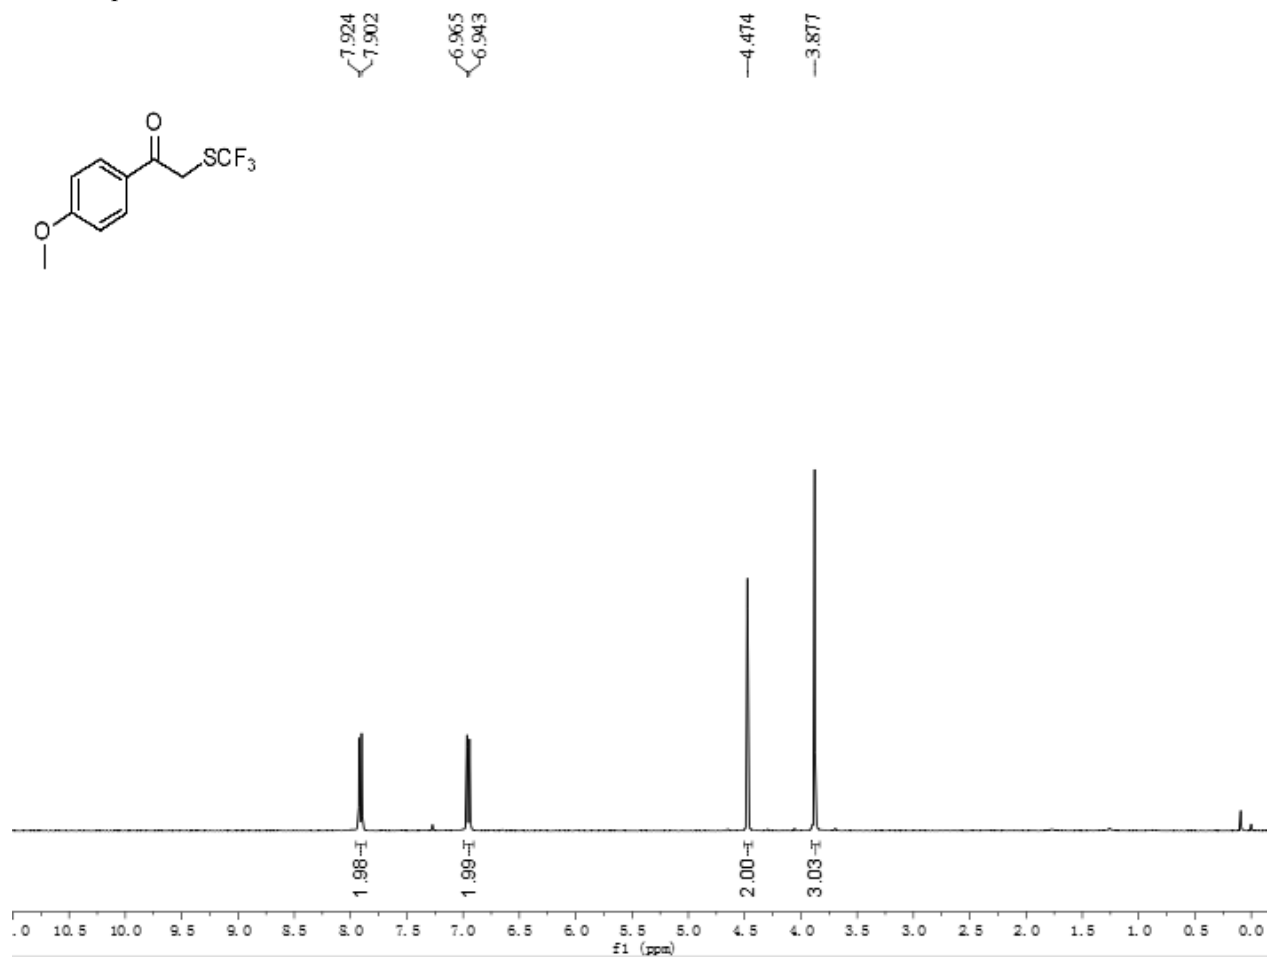

<sup>13</sup>C NMR spectra of **3d**

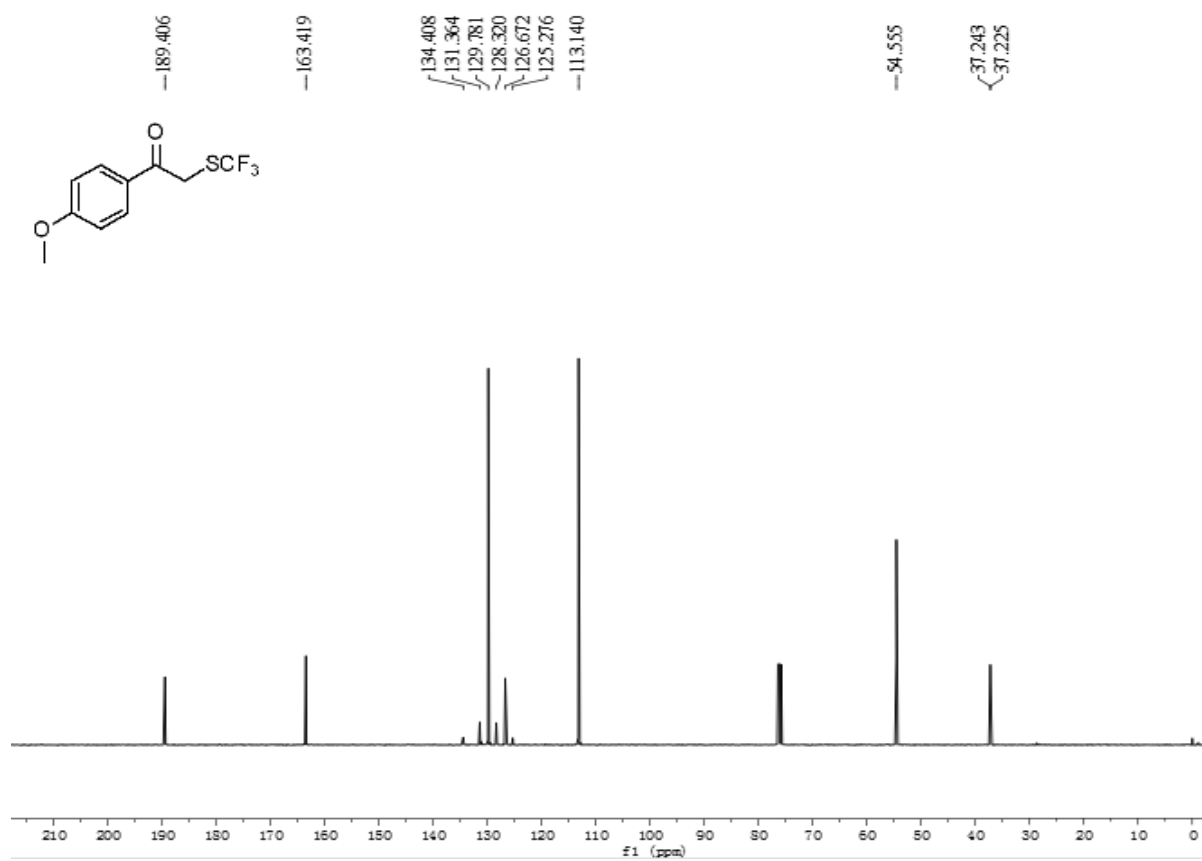

<sup>19</sup>F NMR spectra of **3d**

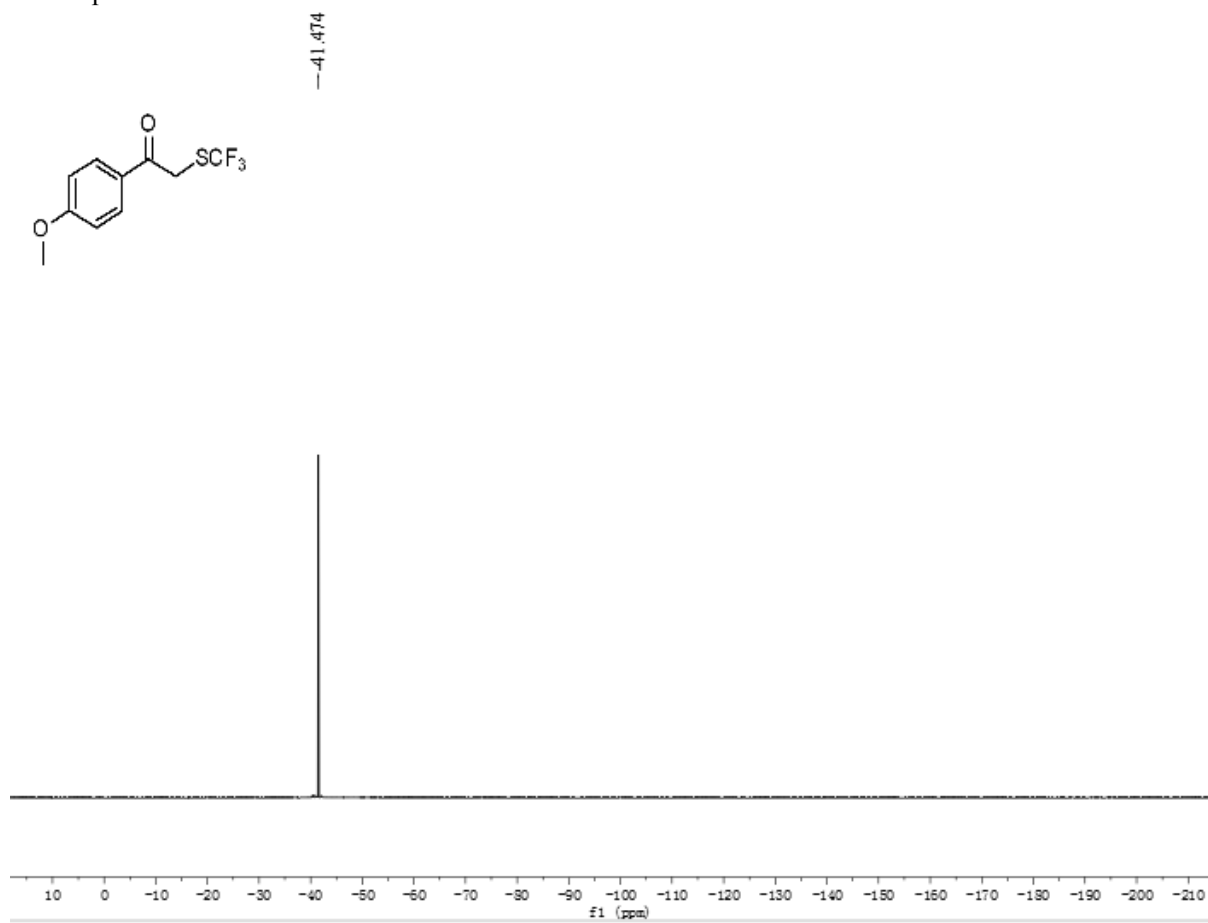

<sup>1</sup>H NMR spectra of **3e**

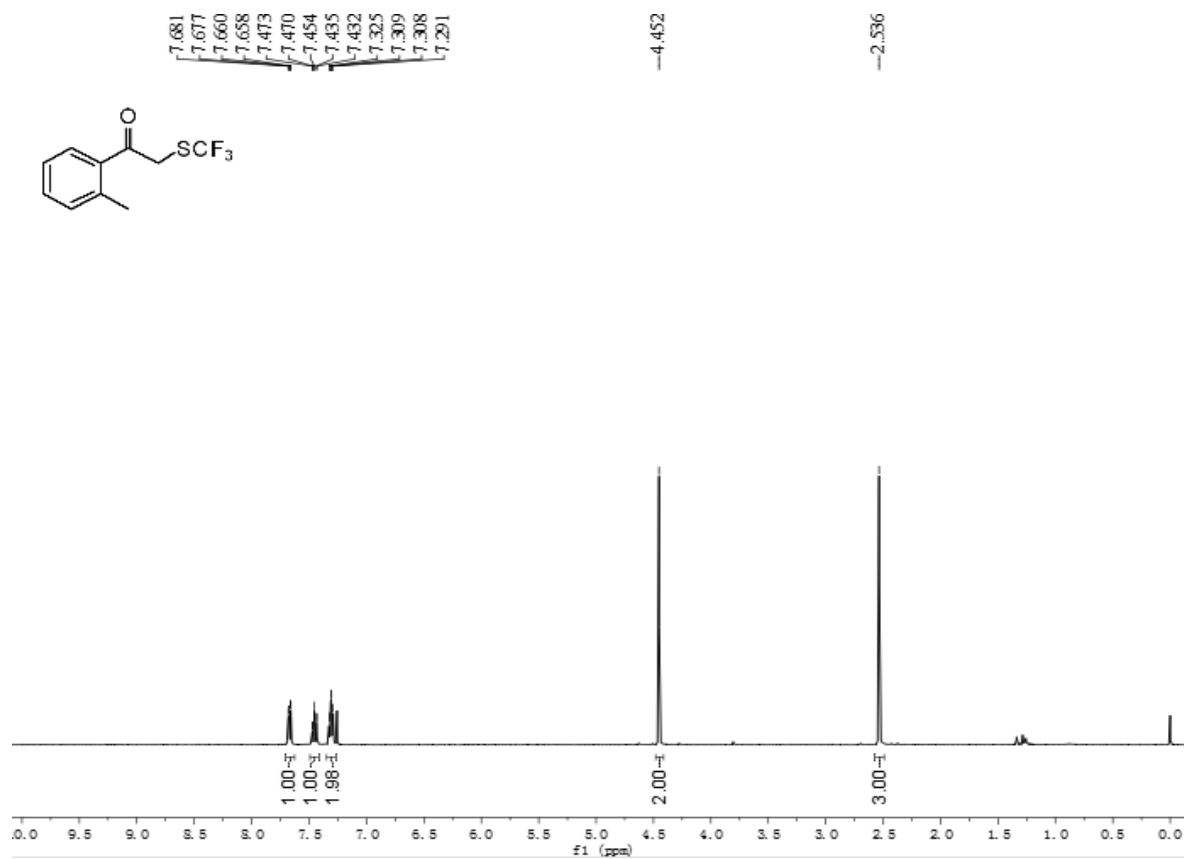

<sup>13</sup>C NMR spectra of **3e**

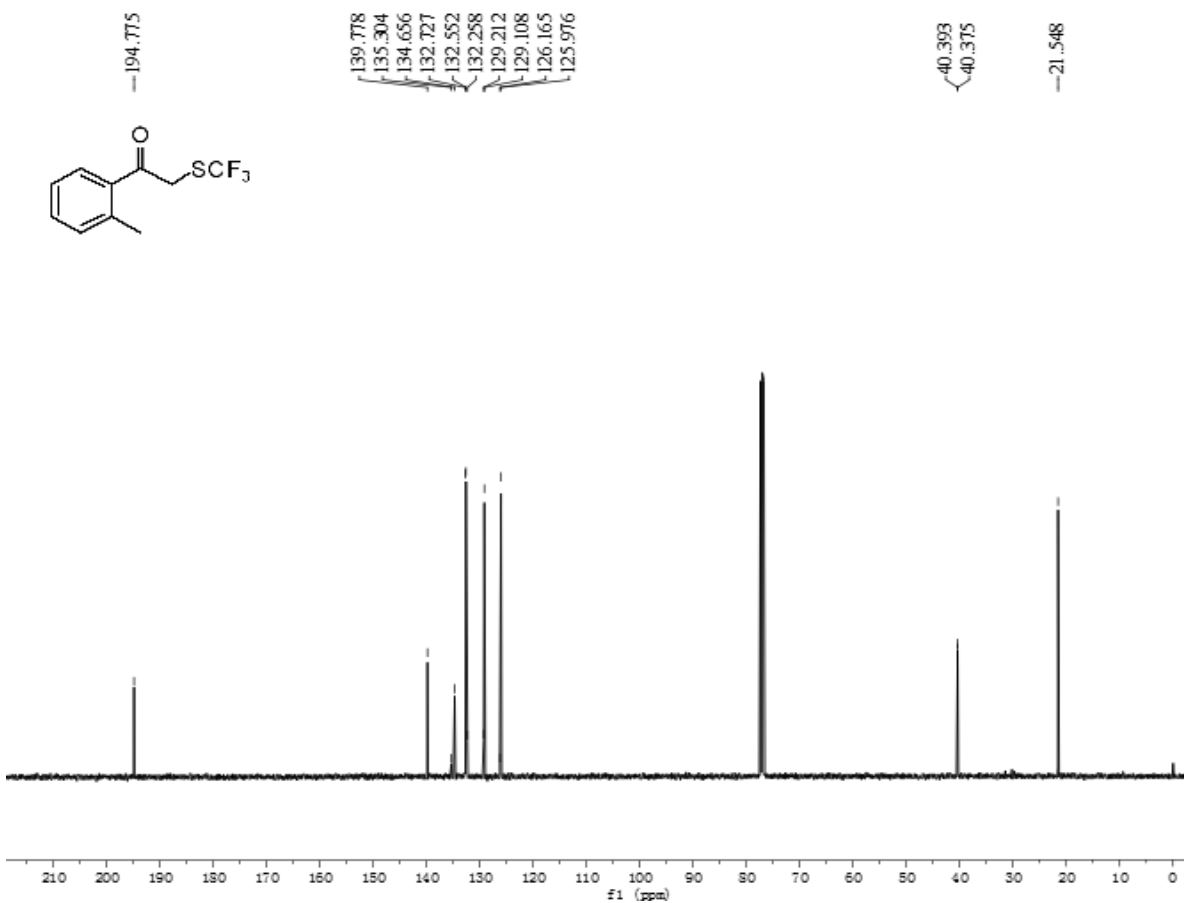



$^{19}\text{F}$  NMR spectra of **3e**

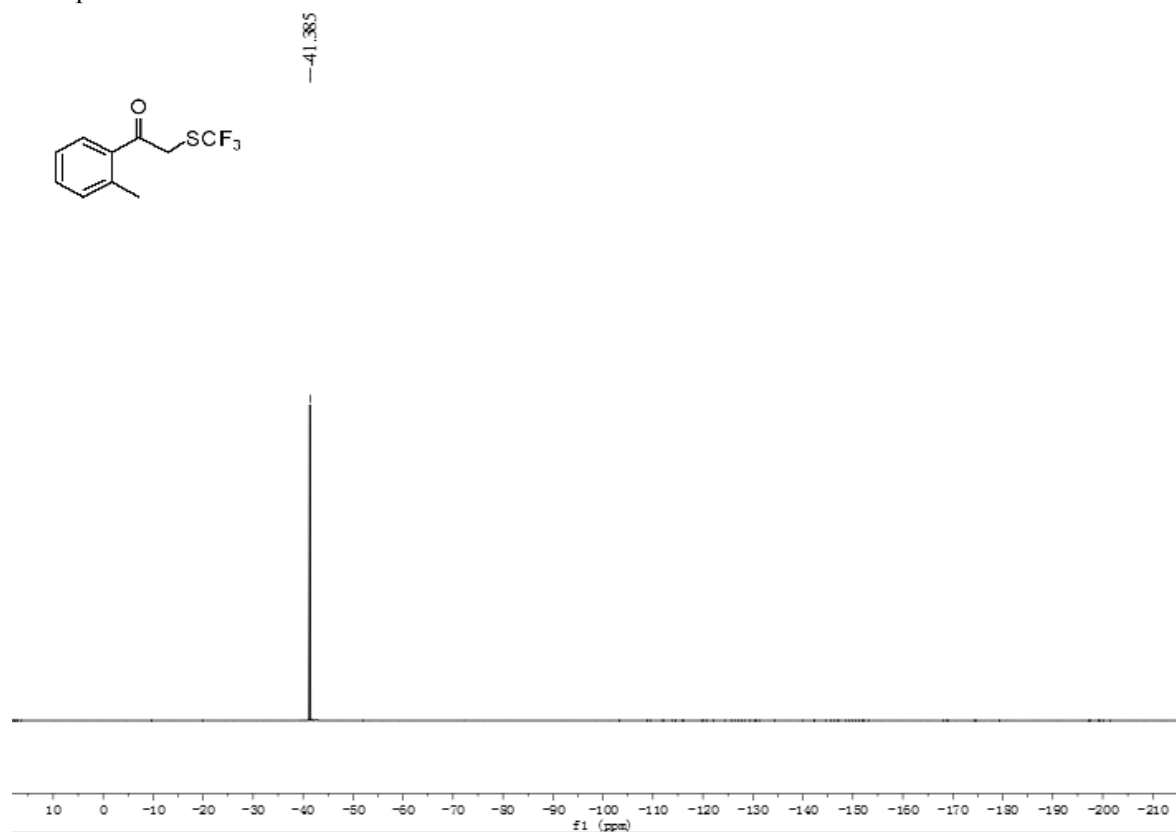

HRMS(EI) spectra of **3e**

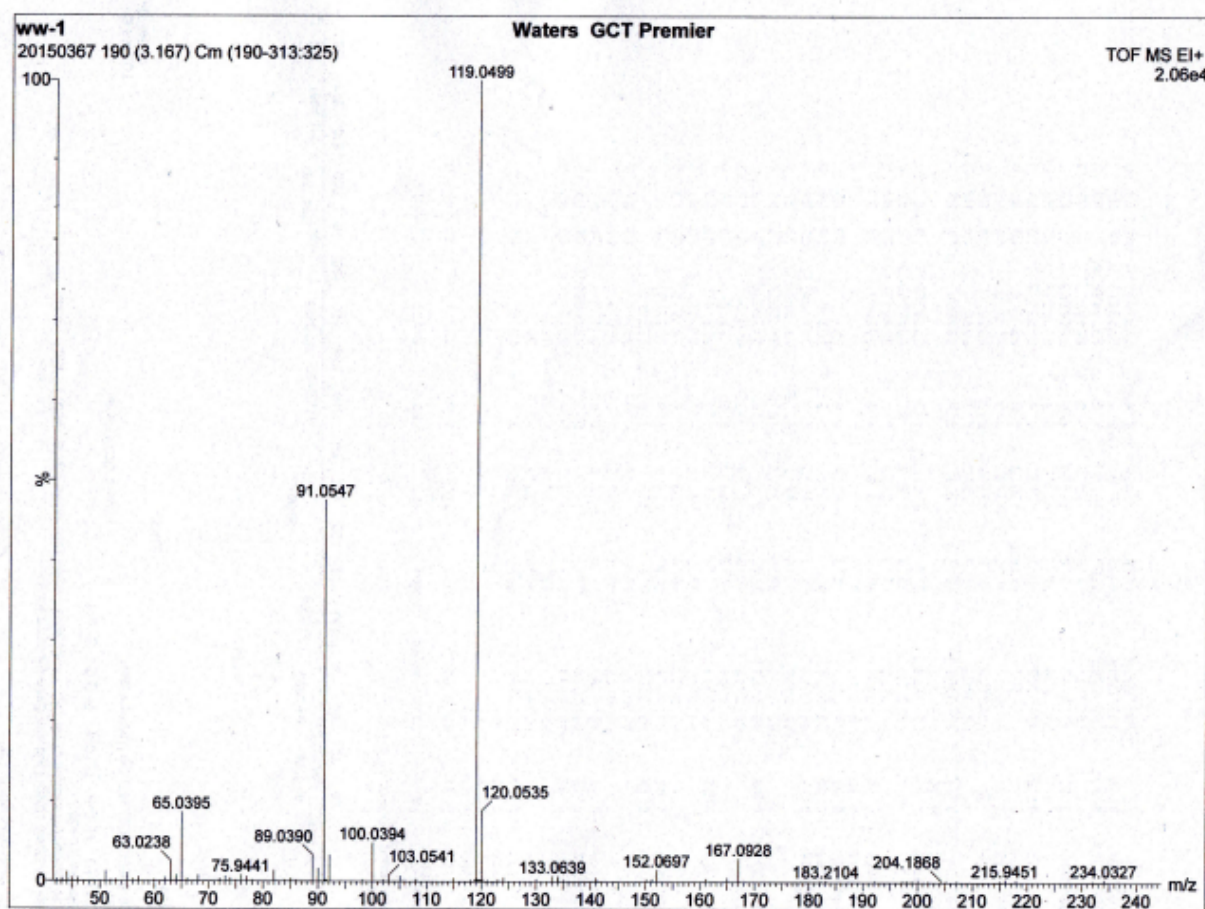

<sup>1</sup>H NMR spectra of **3f**

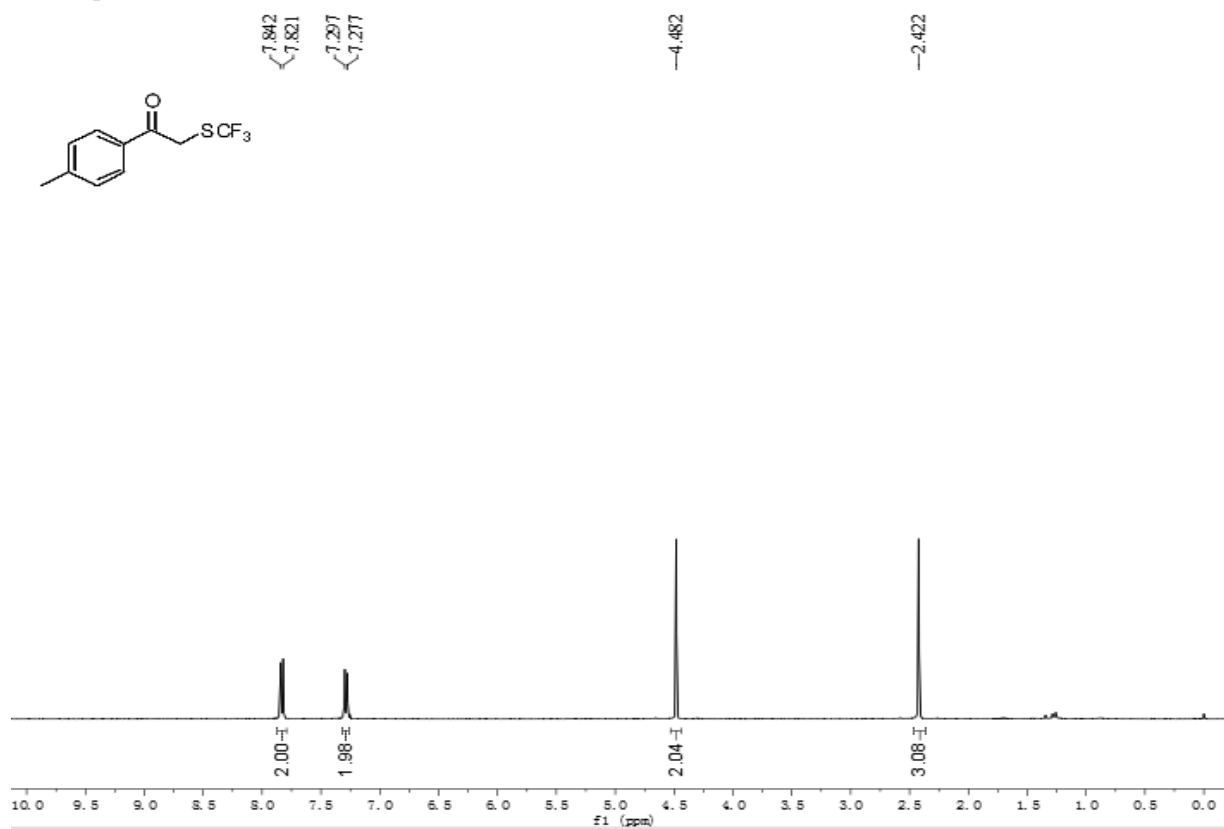

<sup>13</sup>C NMR spectra of **3f**

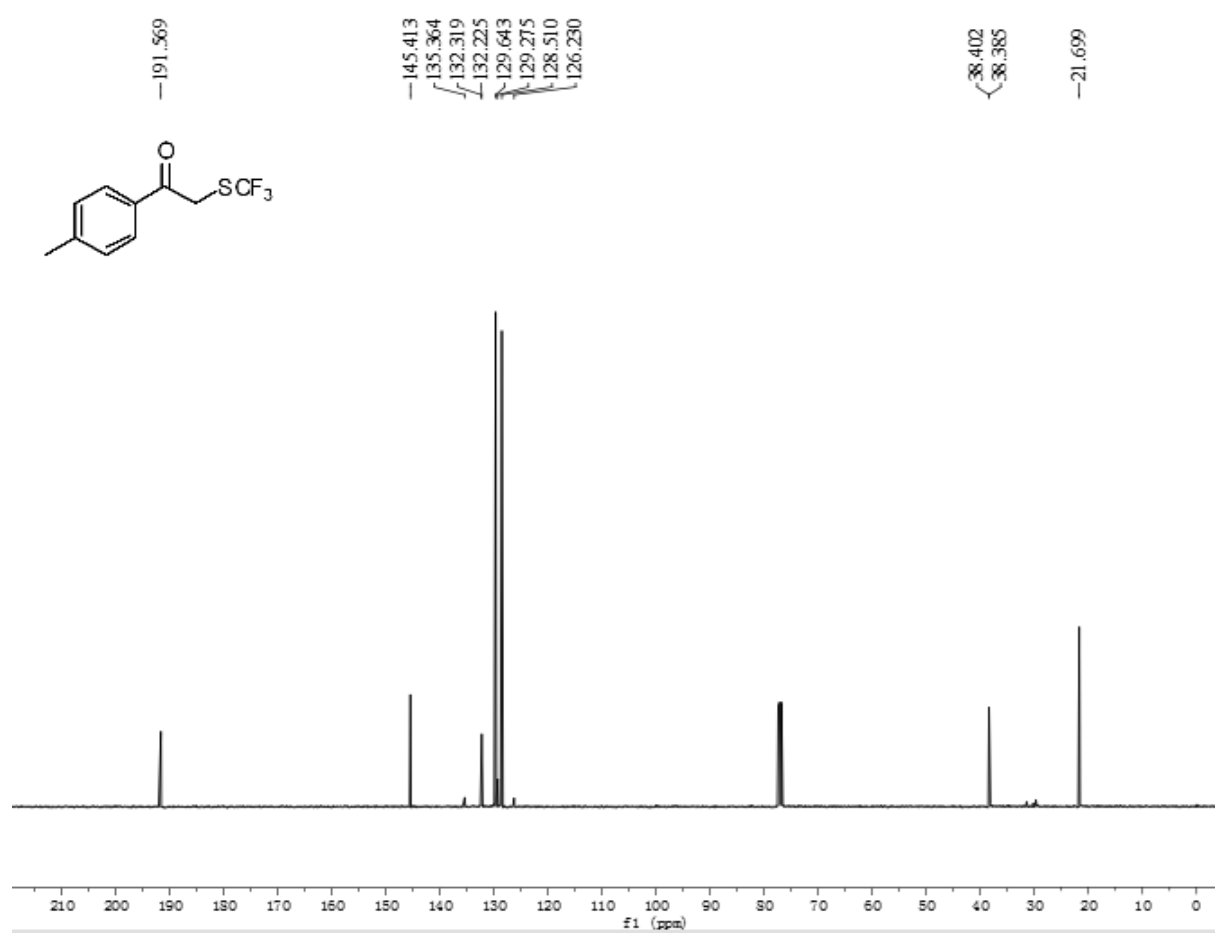

$^{19}\text{F}$  NMR spectra of **3f**

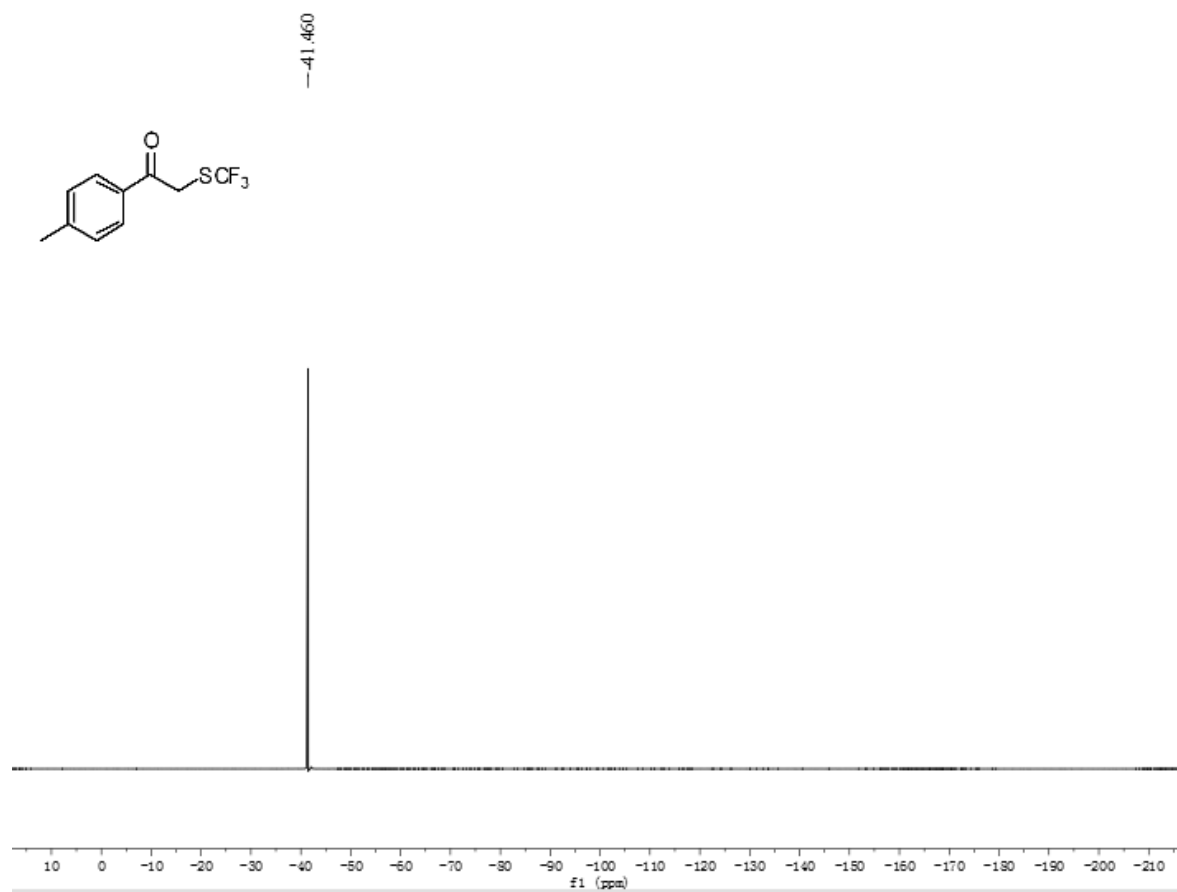

$^1\text{H}$  NMR spectra of **3g**

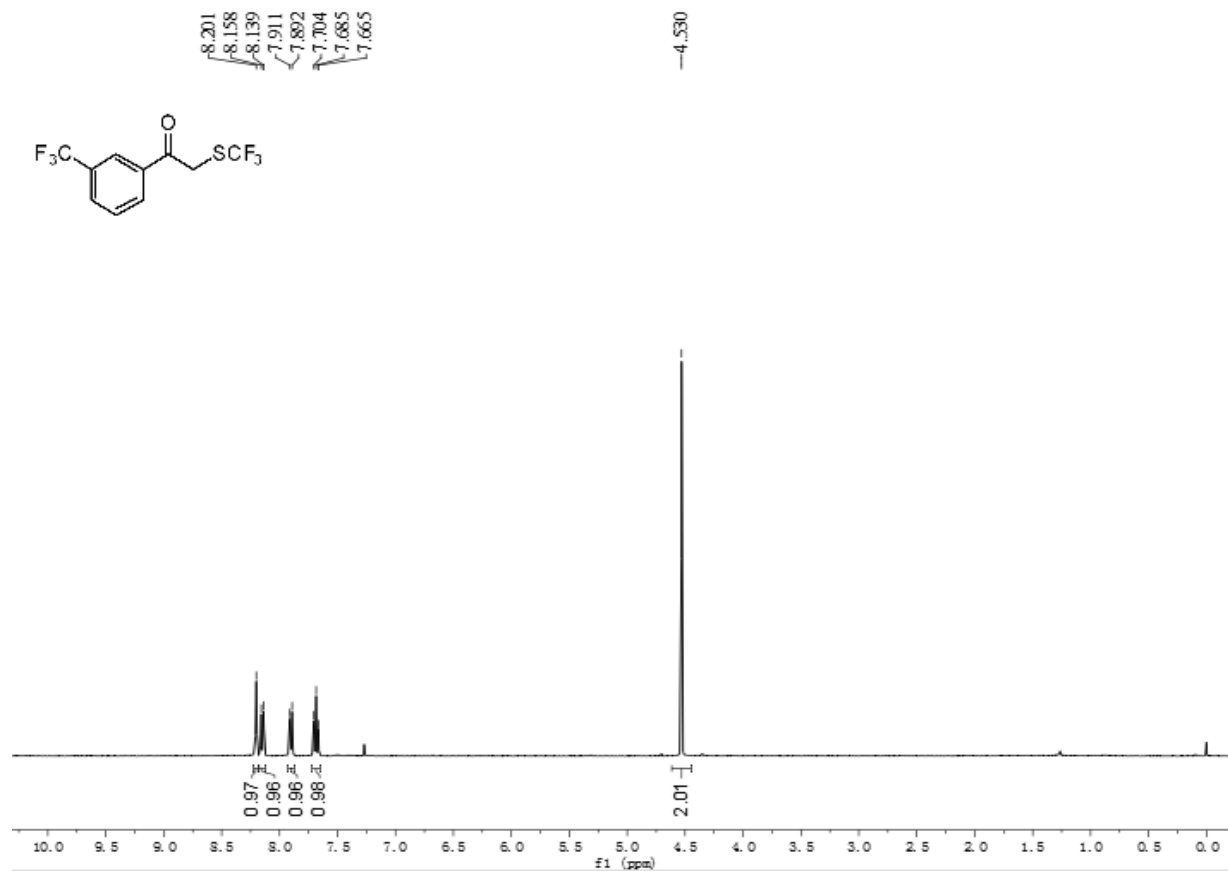

<sup>13</sup>C NMR spectra of **3g**

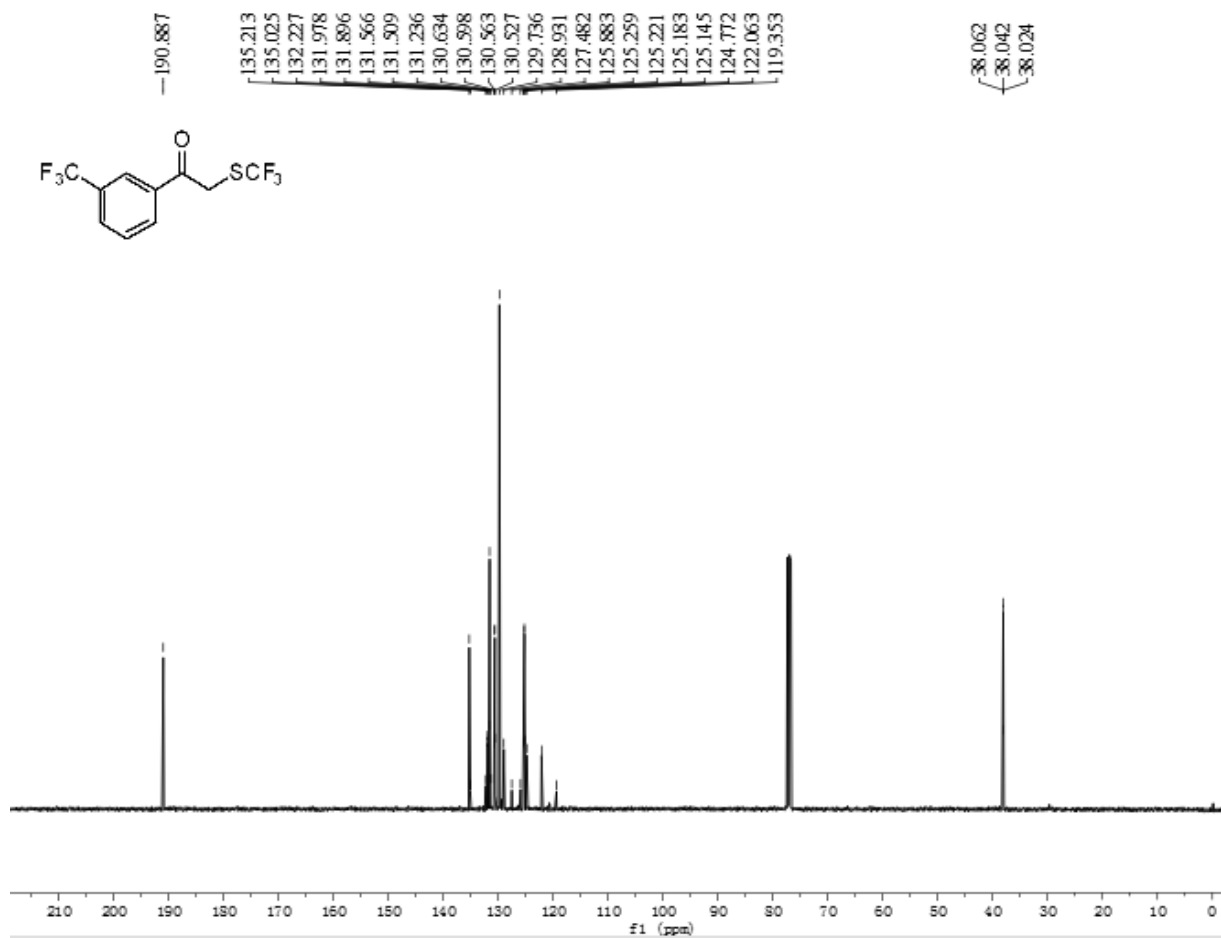

<sup>19</sup>F NMR spectra of **3g**

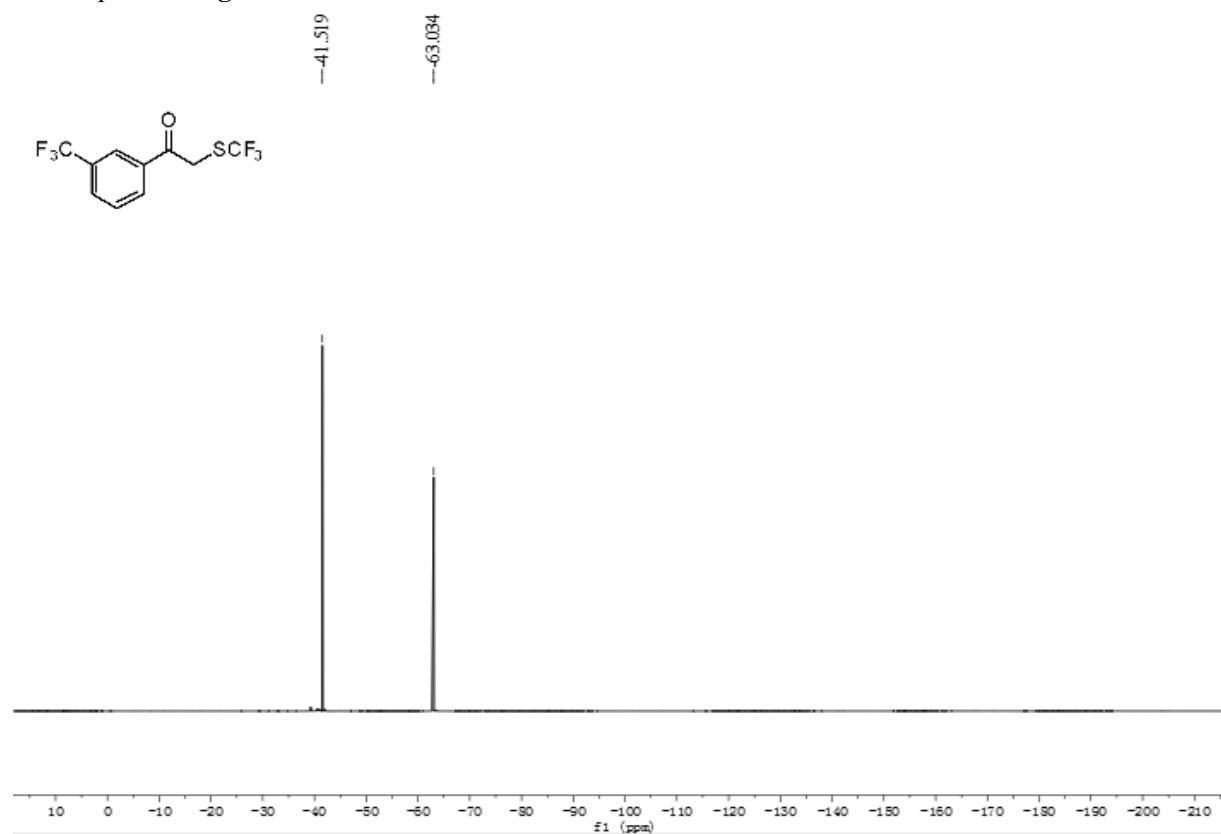

HRMS(EI) spectra of **3g**

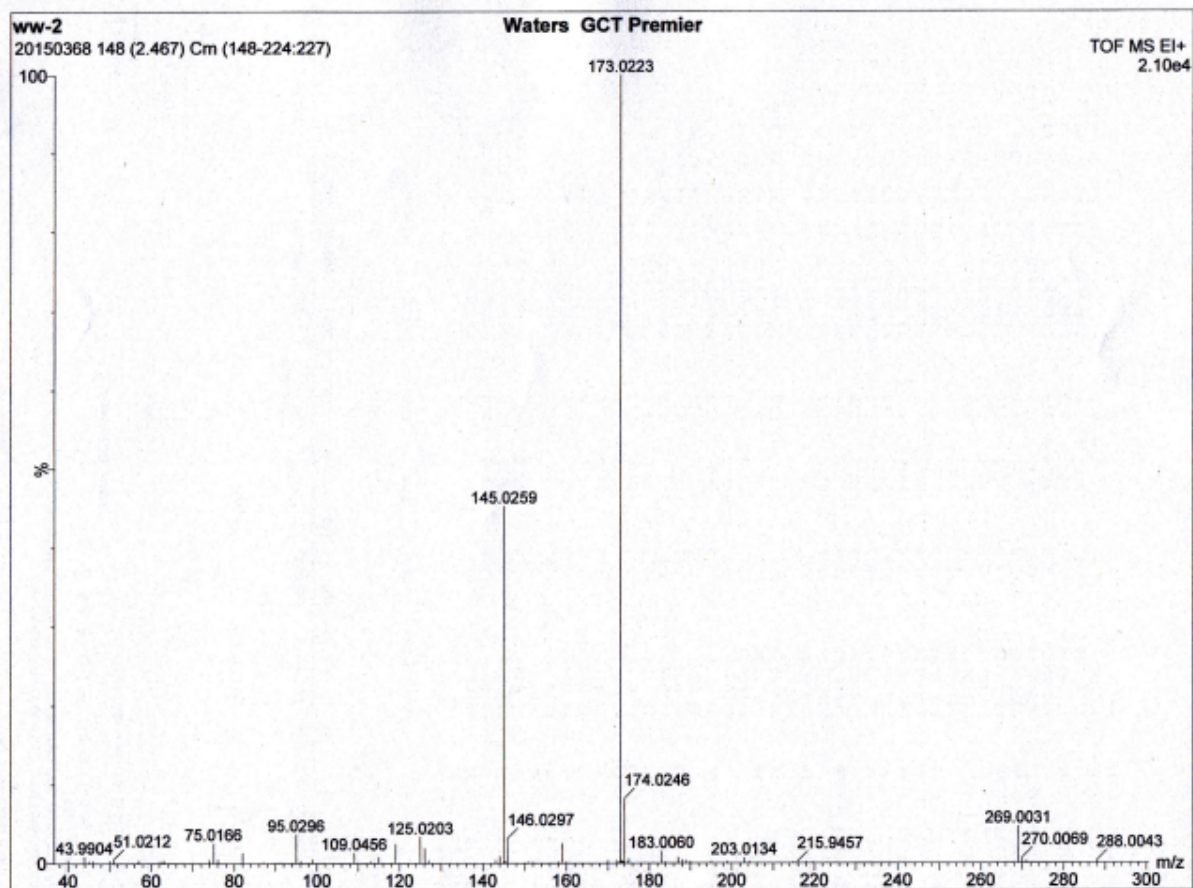

<sup>1</sup>H NMR spectra of **3h**

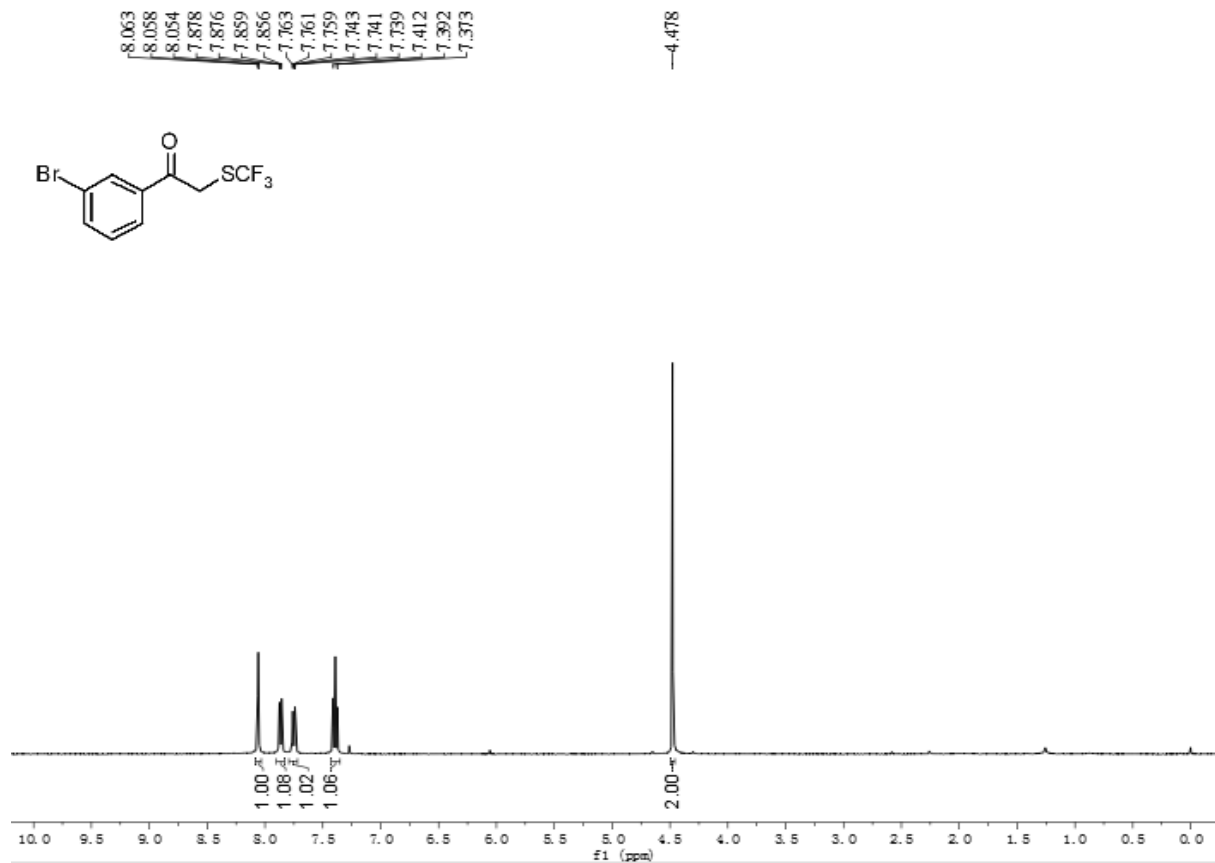

<sup>13</sup>C NMR spectra of **3h**

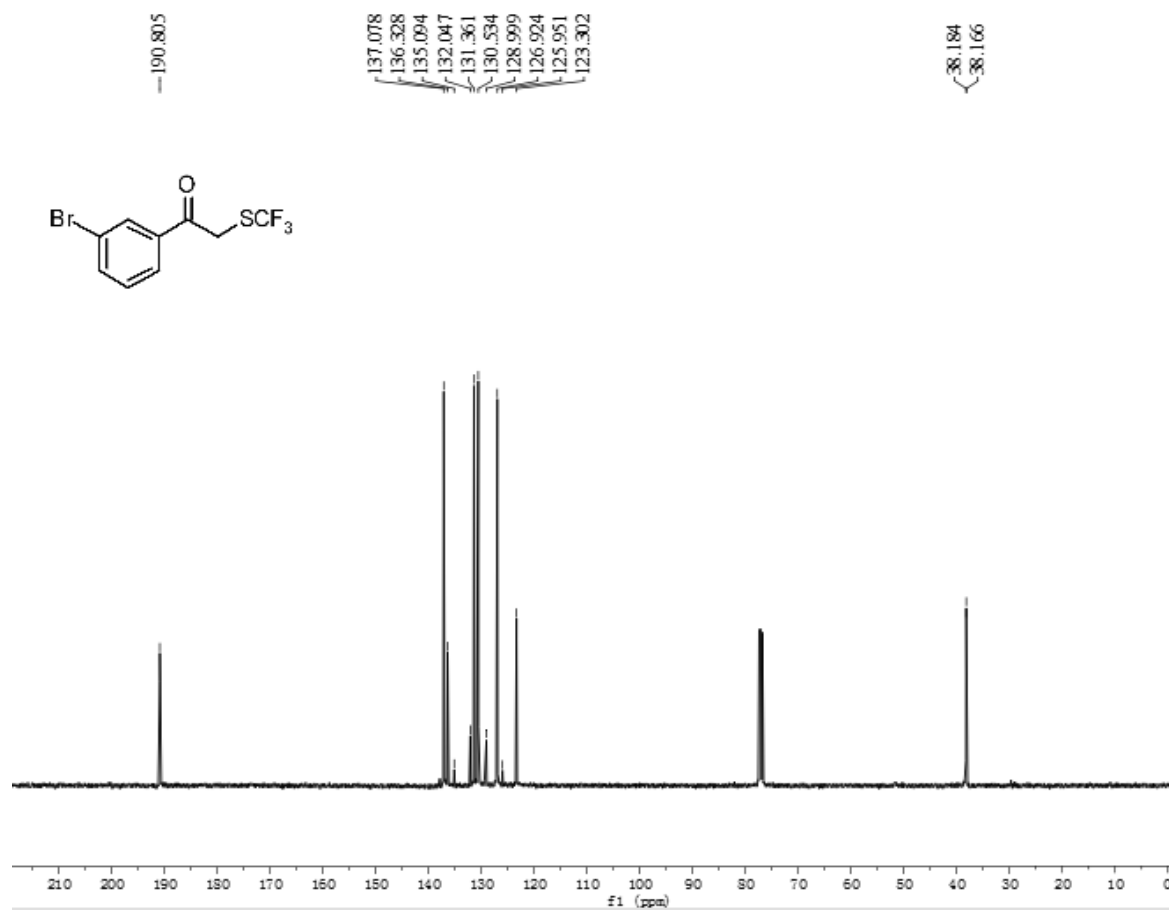

<sup>19</sup>F NMR spectra of **3h**

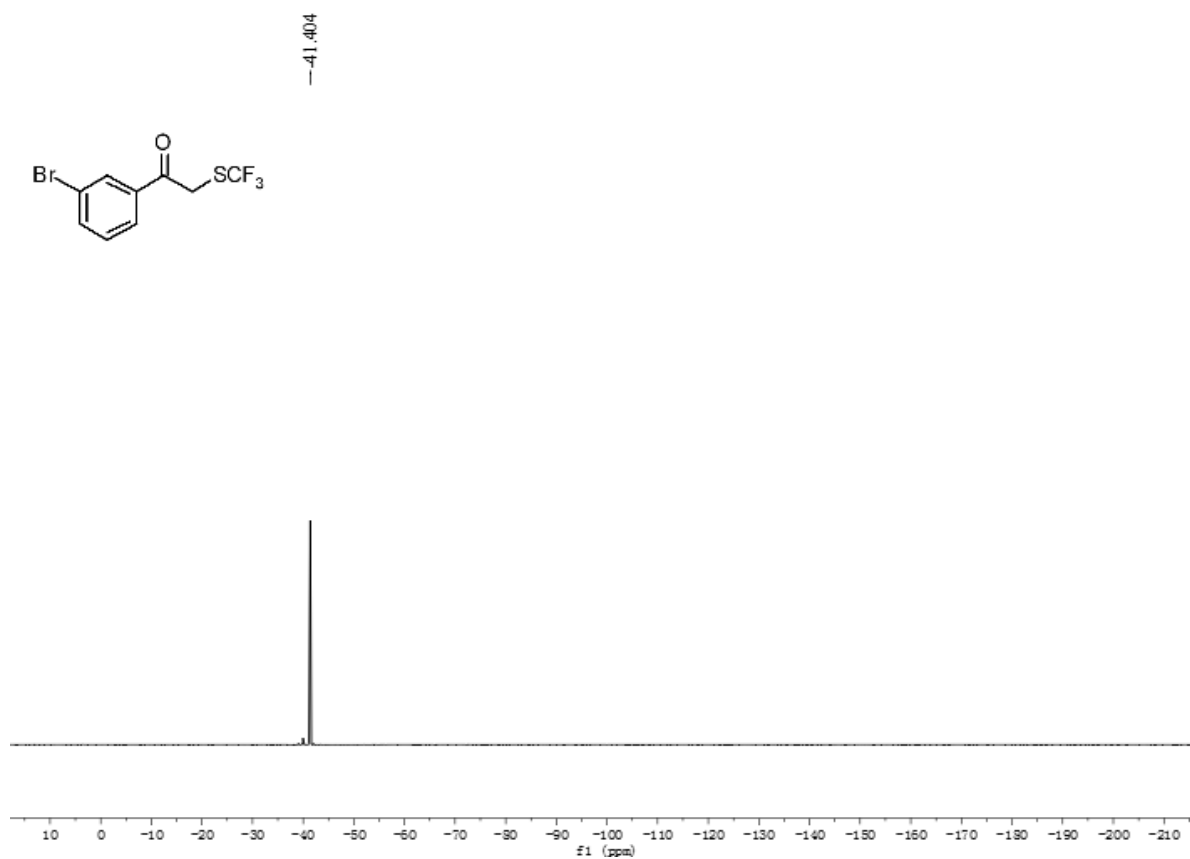

HRMS(EI) spectra of **3h**

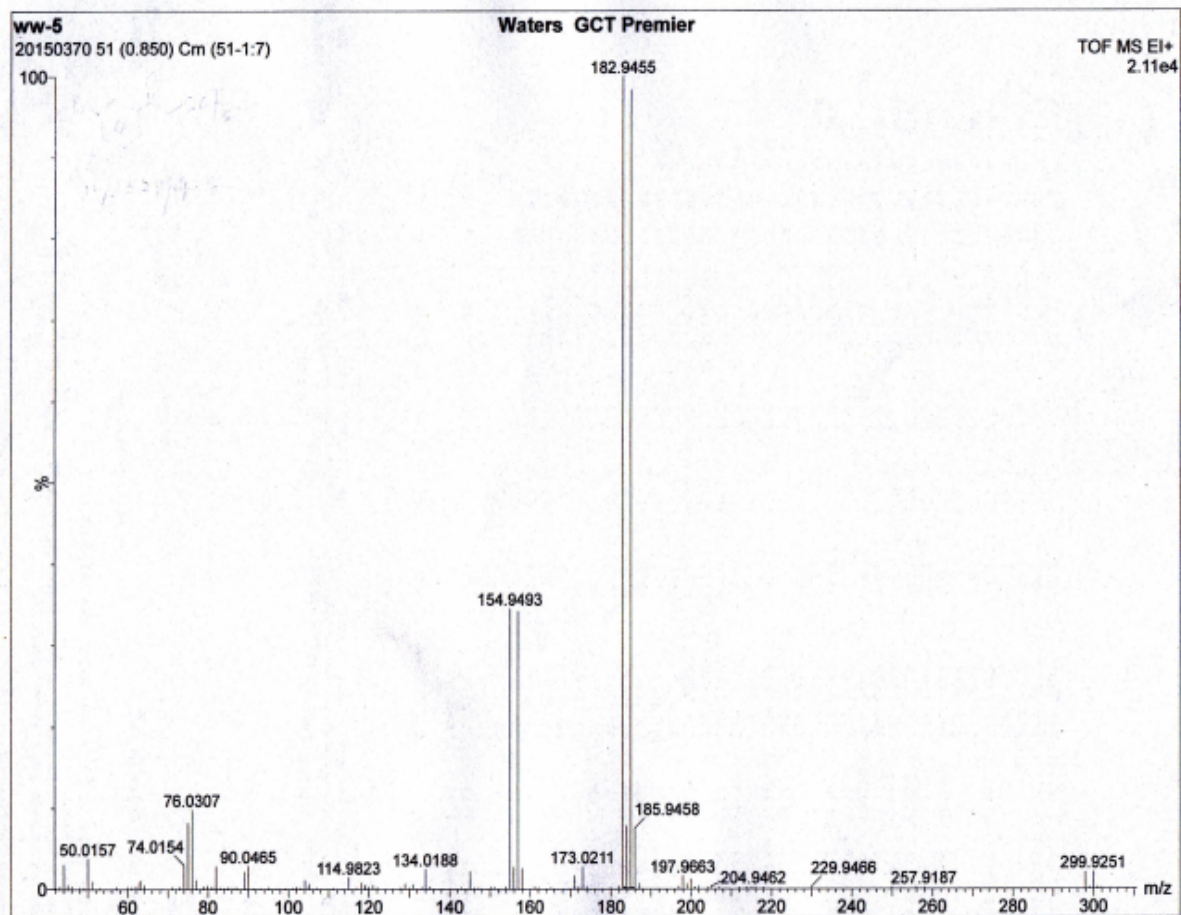

<sup>1</sup>H NMR spectra of **3i**

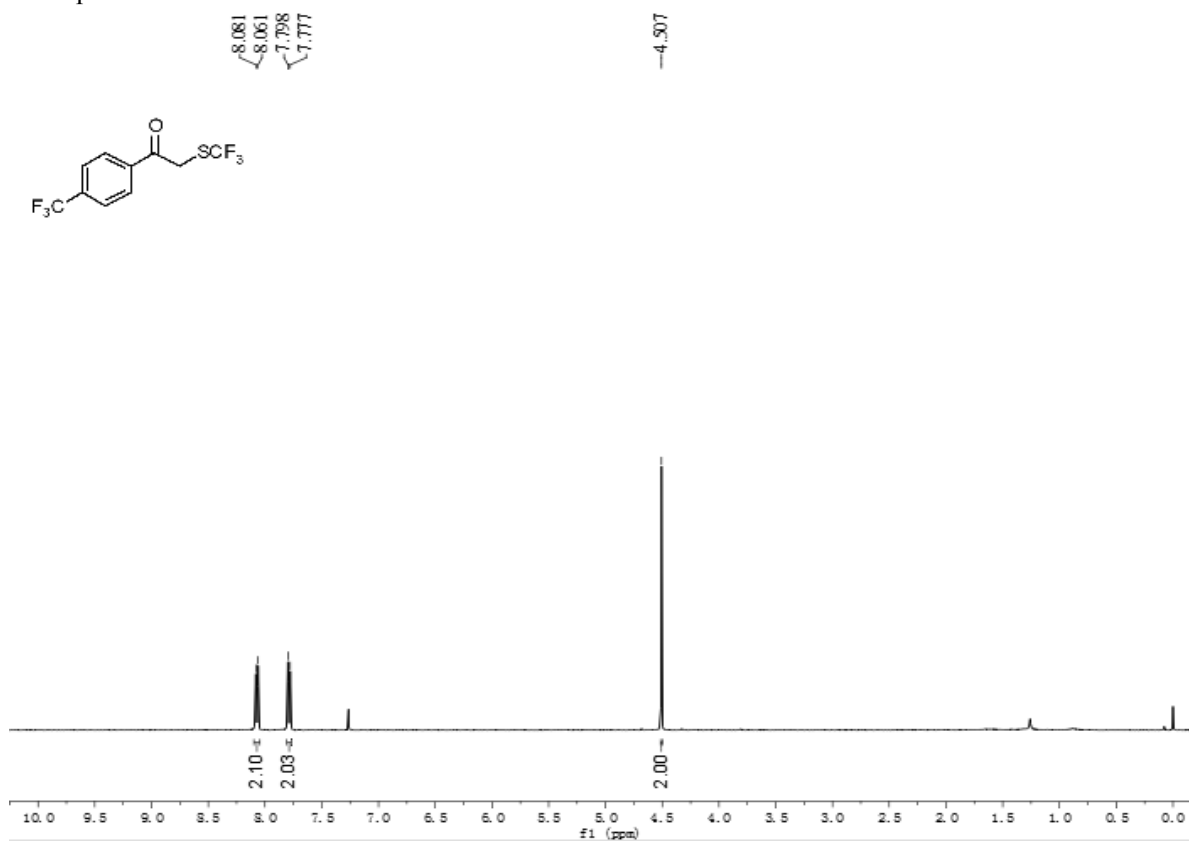

<sup>13</sup>C NMR spectra of **3i**

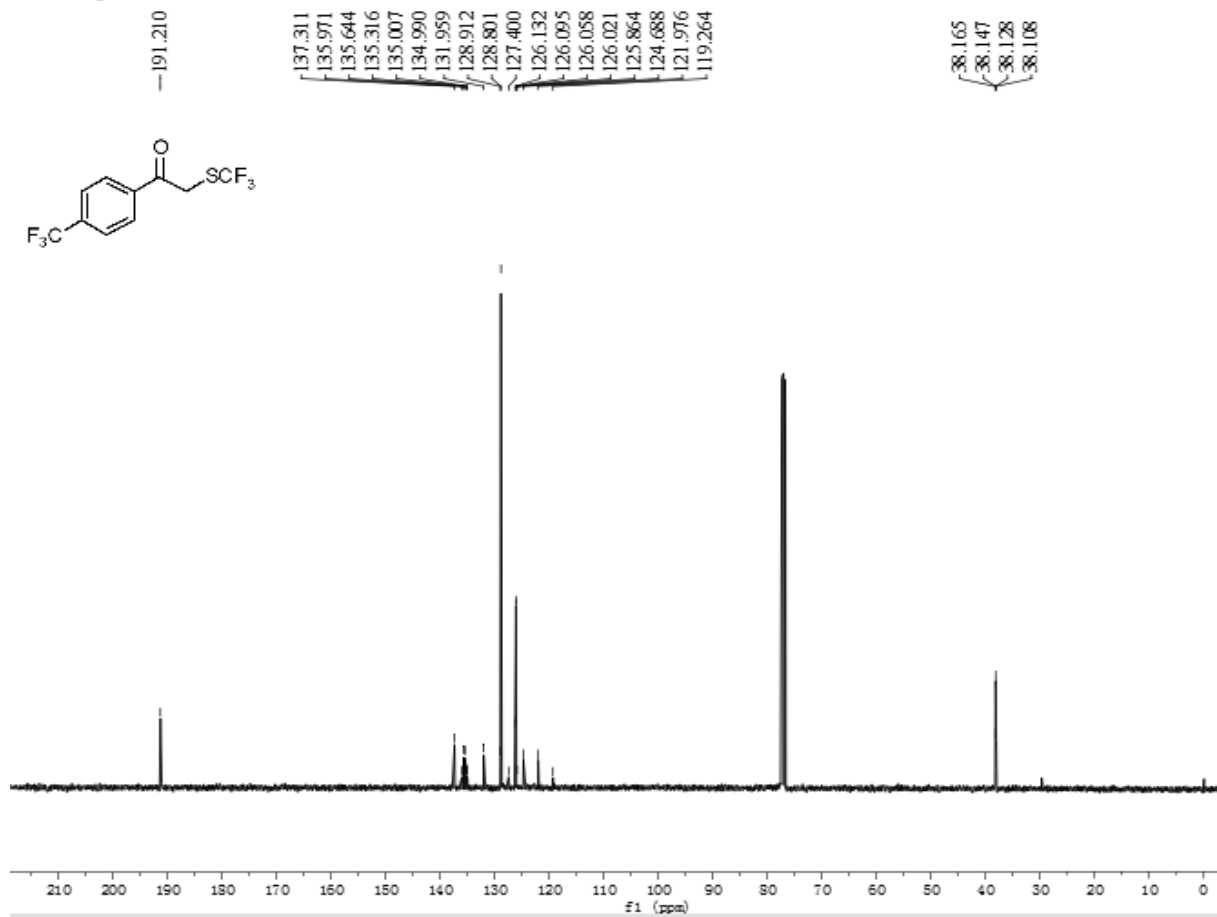

<sup>19</sup>F NMR spectra of **3i**

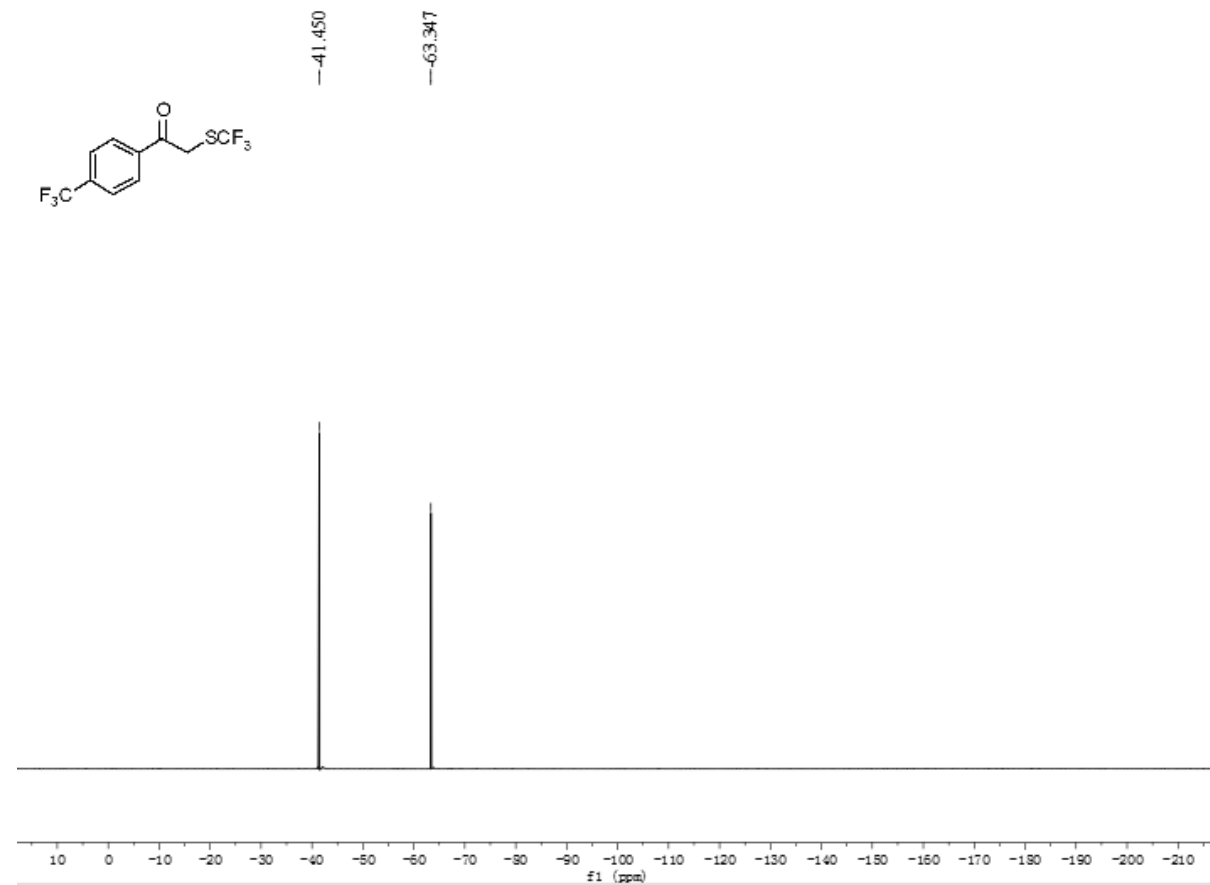



HRMS(EI) spectra of **3i**

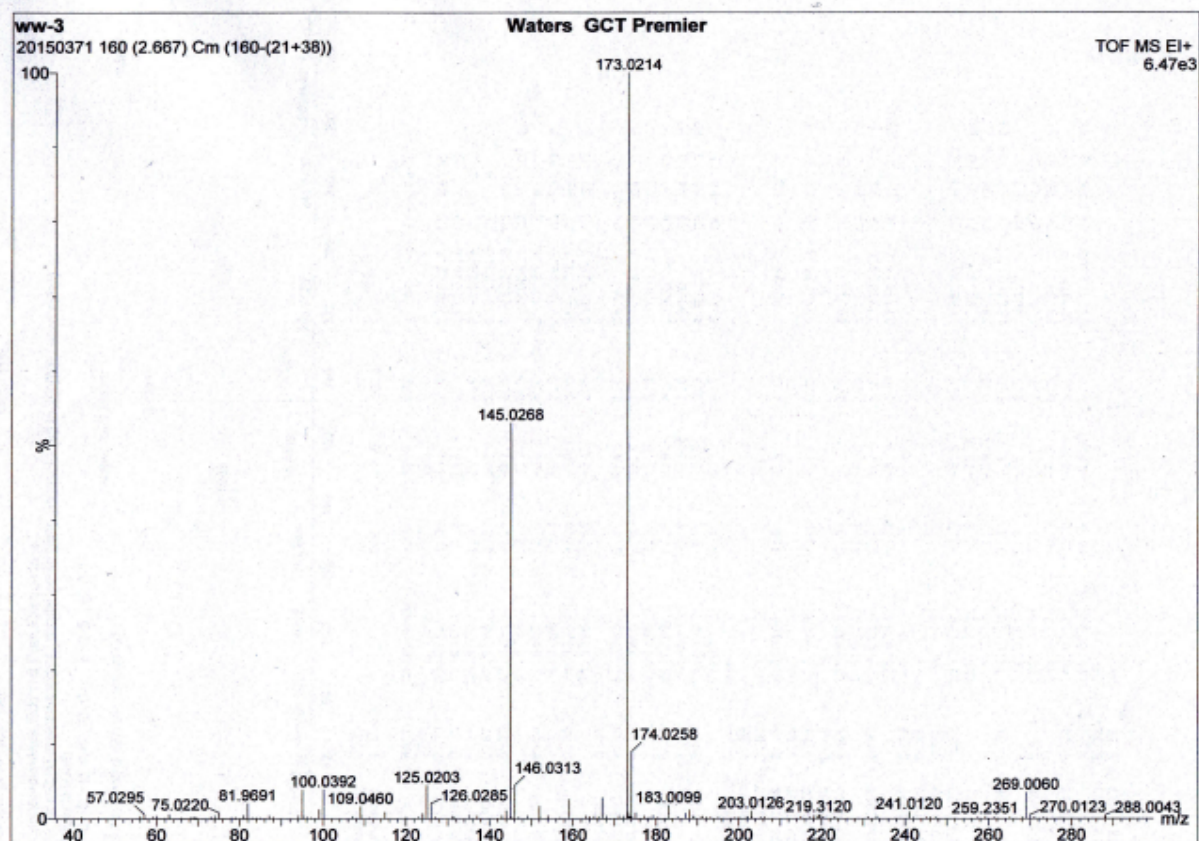

<sup>1</sup>H NMR spectra of **3j**

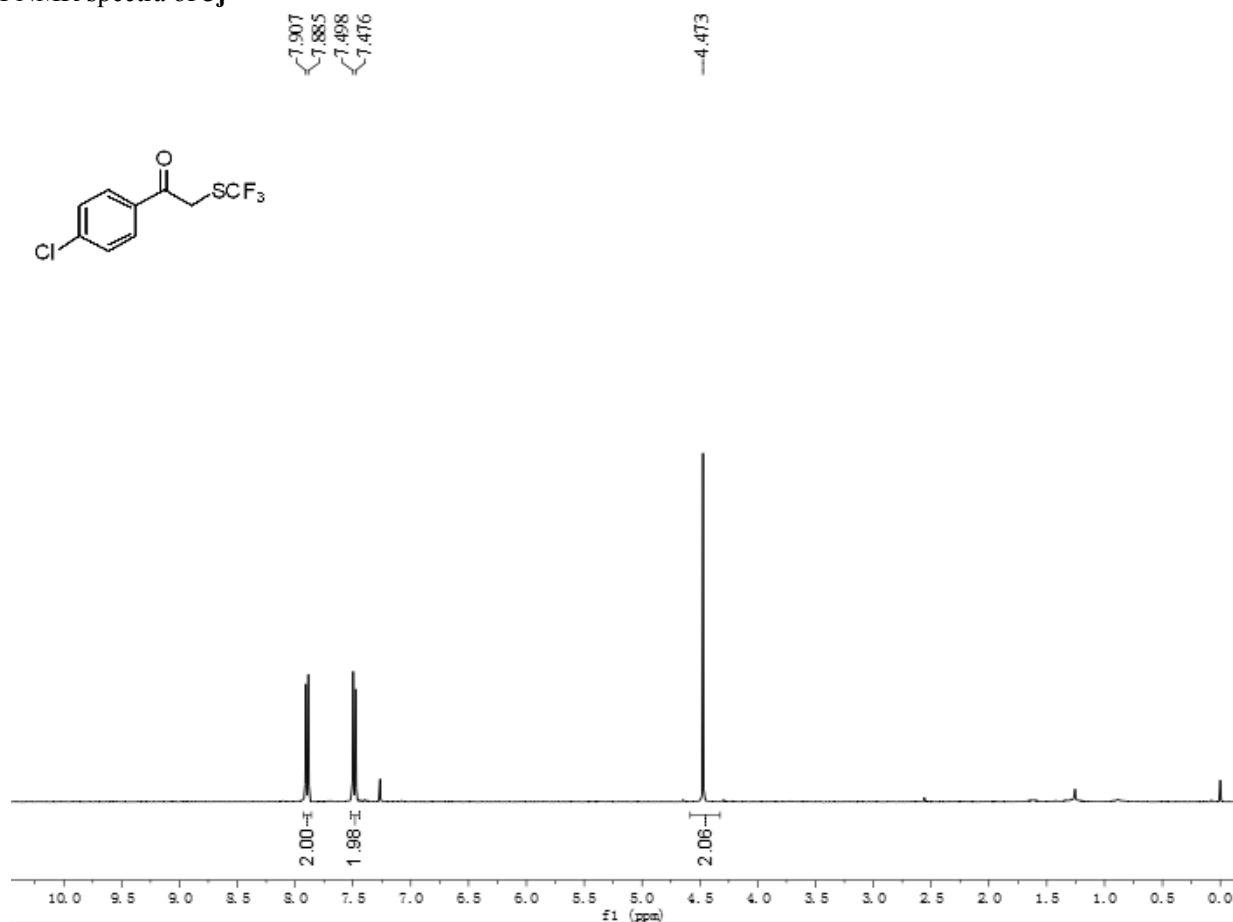

<sup>13</sup>C NMR spectra of **3j**

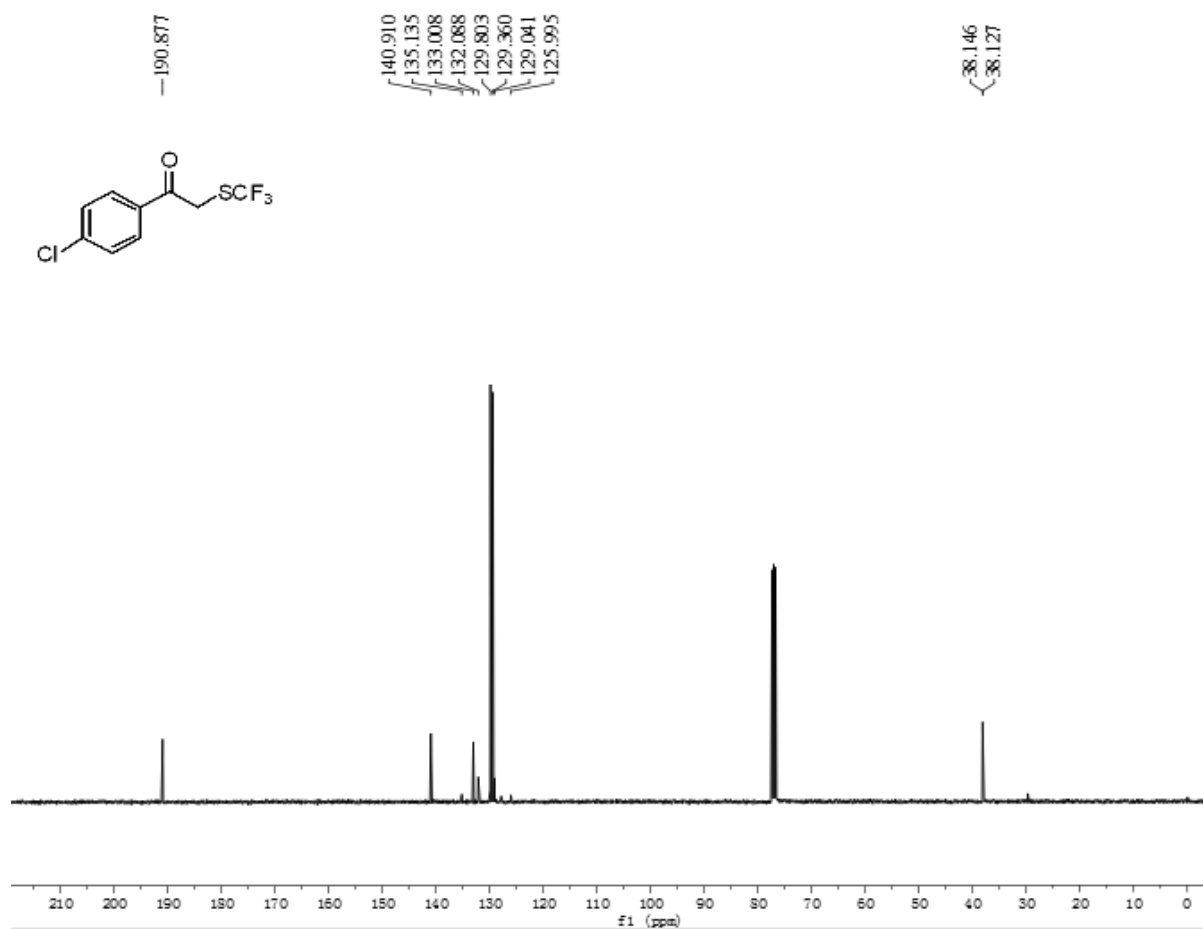

<sup>19</sup>F NMR spectra of **3j**

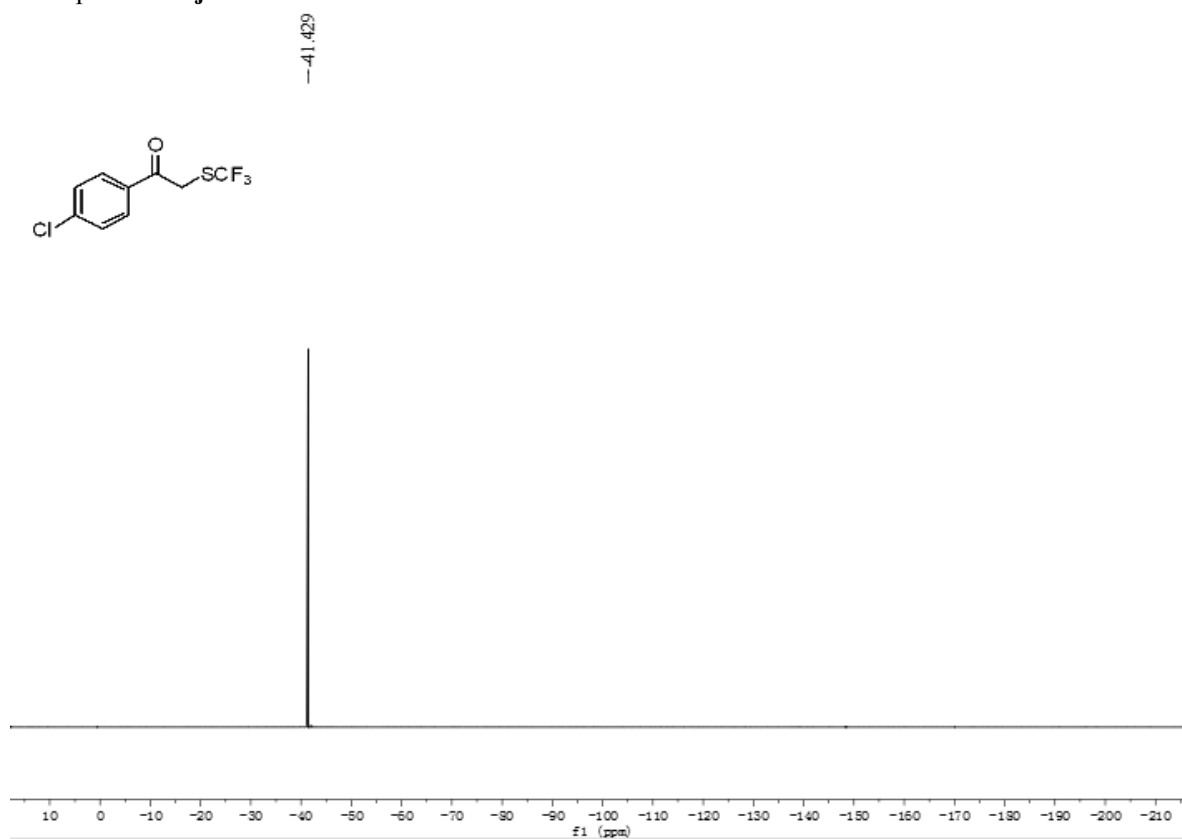

HRMS(EI) spectra of **3j**

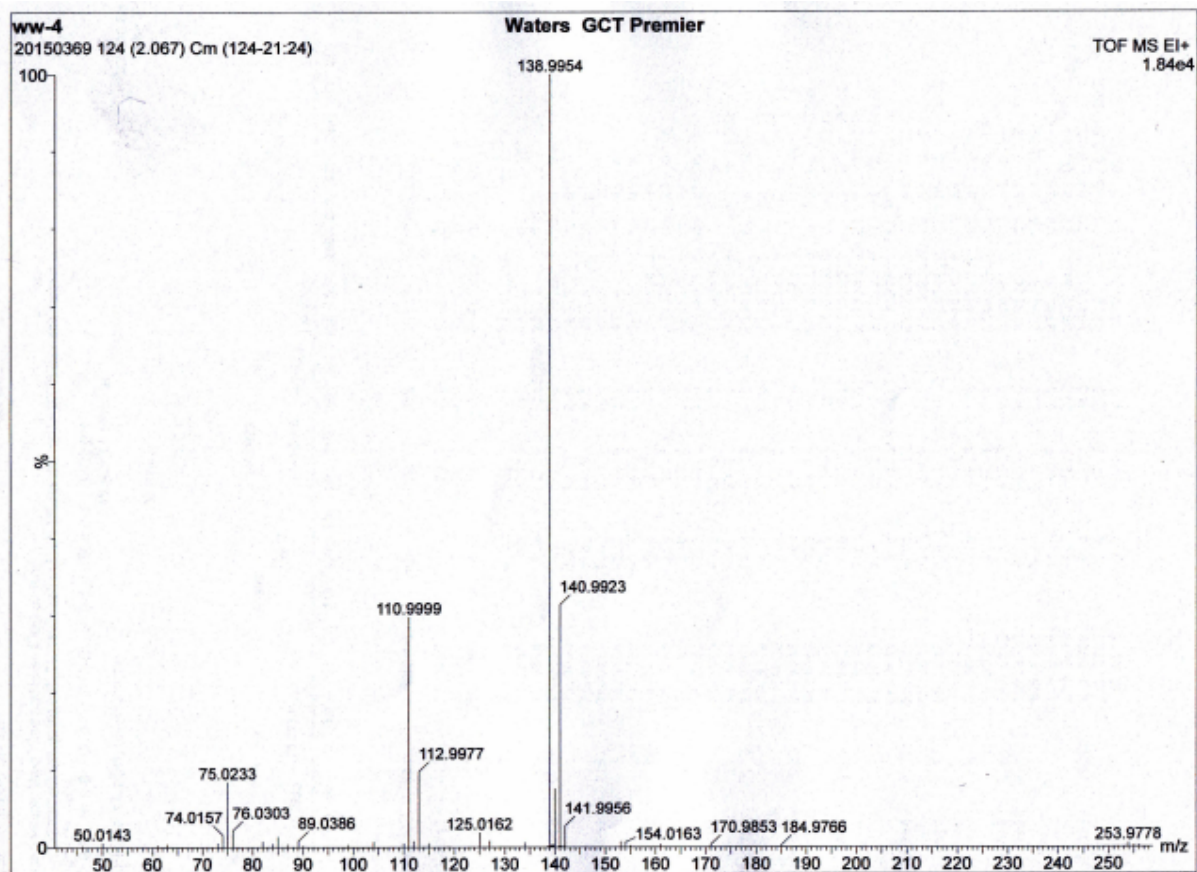

<sup>1</sup>H NMR spectra of **3k**

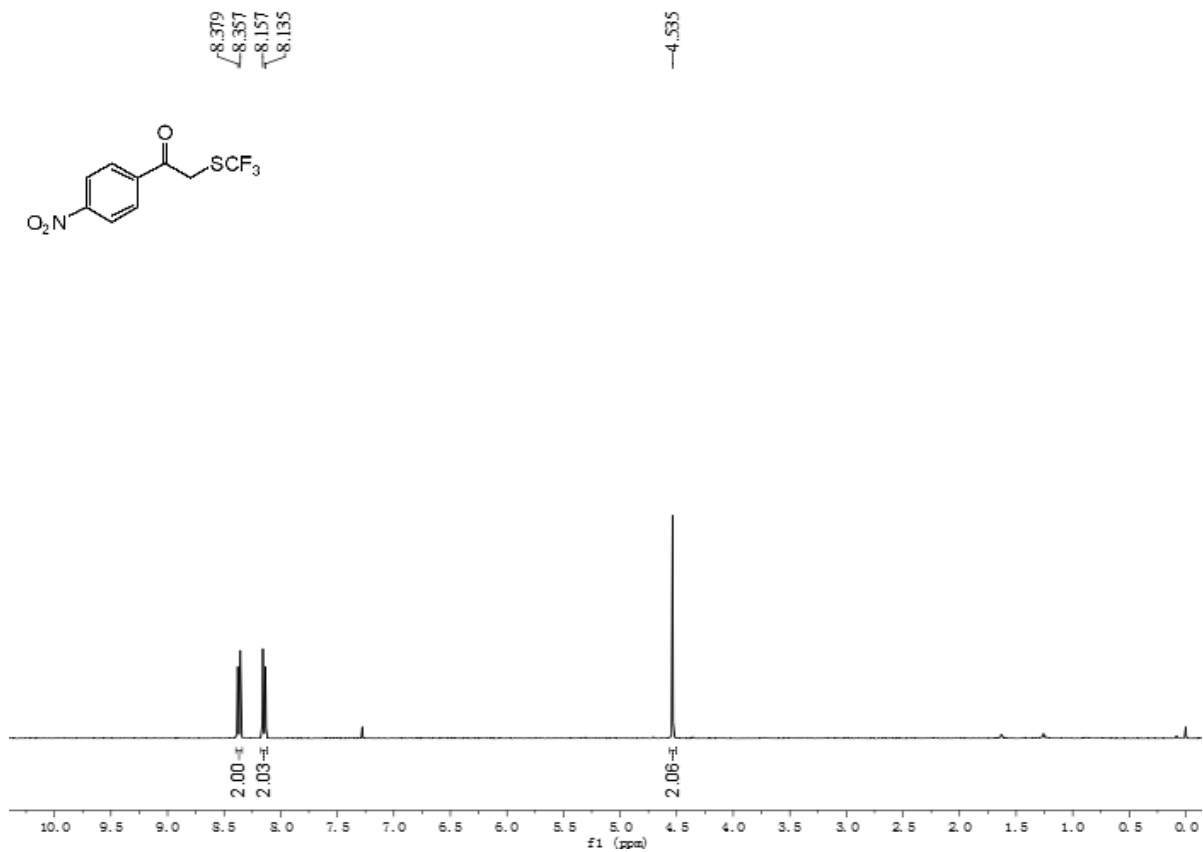

<sup>13</sup>C NMR spectra of **3k**

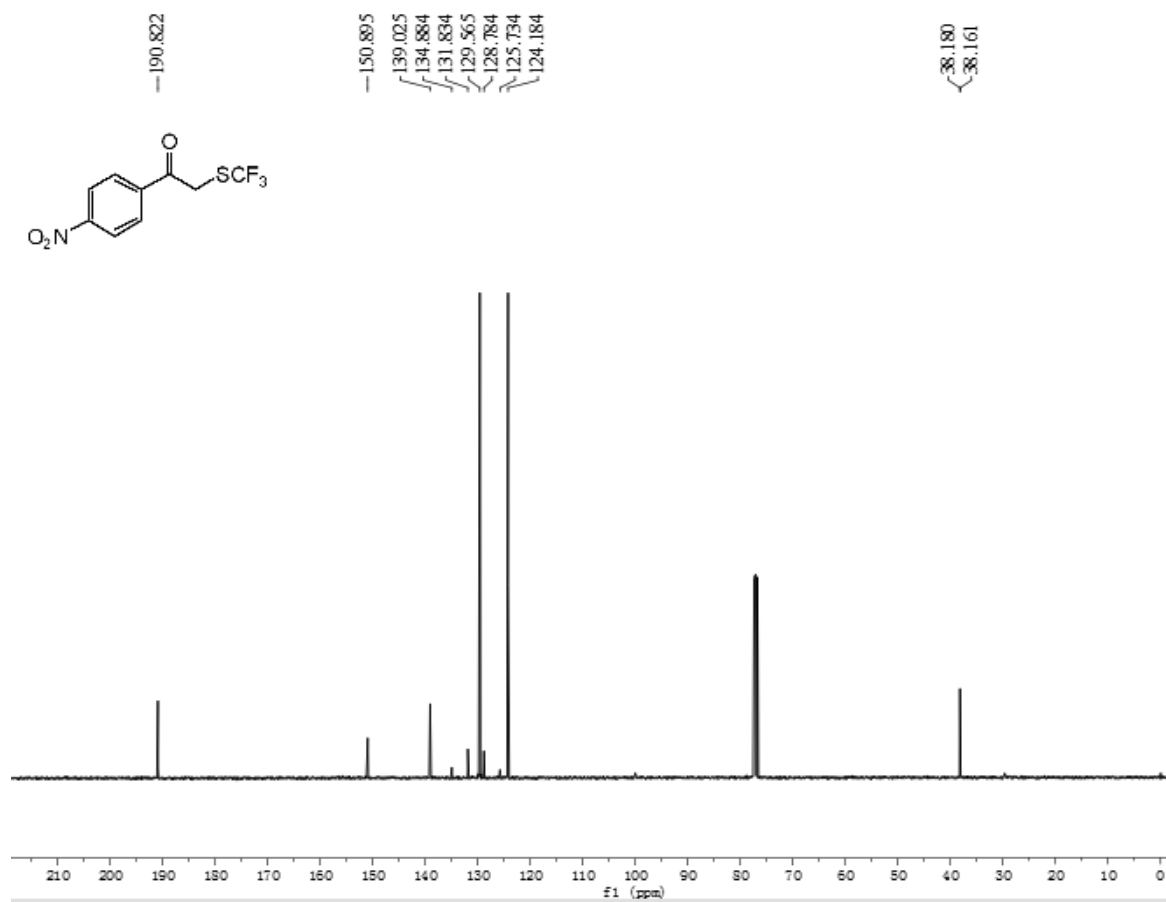

<sup>19</sup>F NMR spectra of **3k**

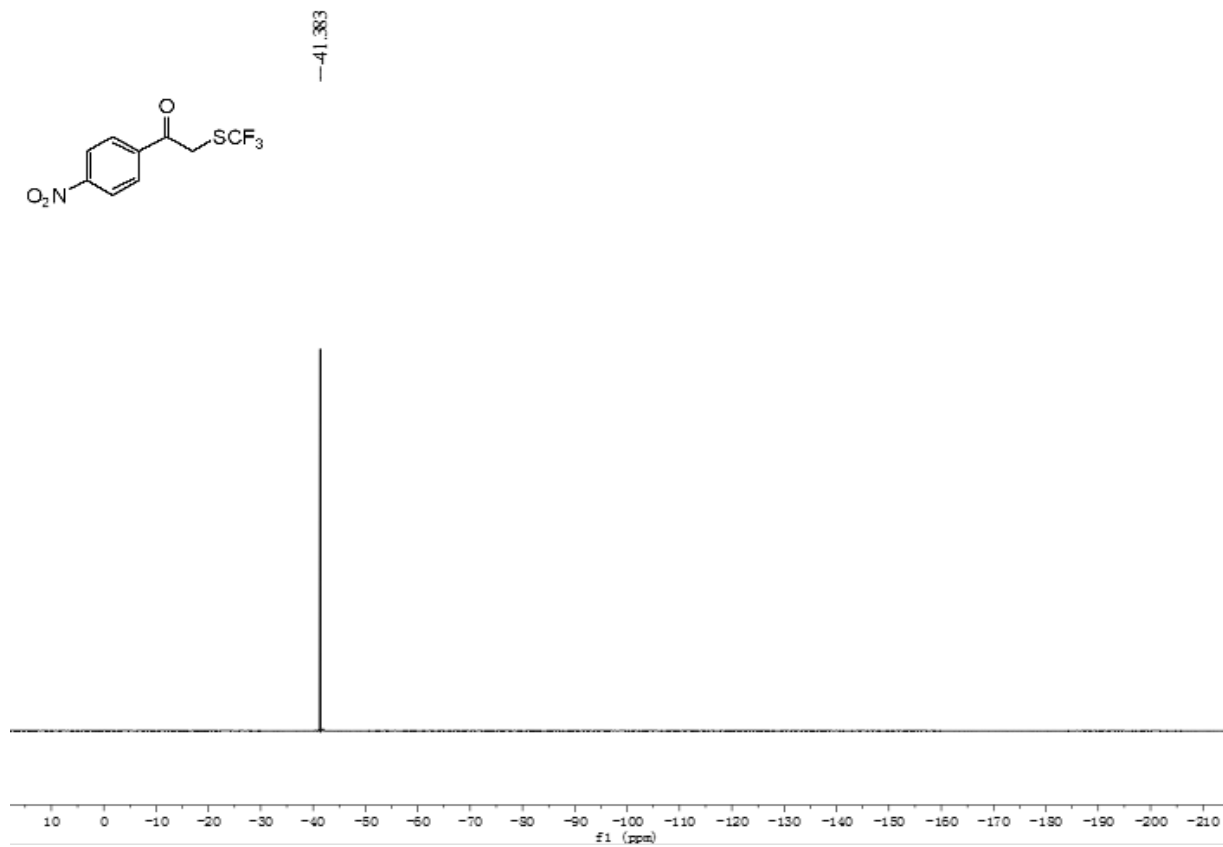

<sup>1</sup>H NMR spectra of **31**

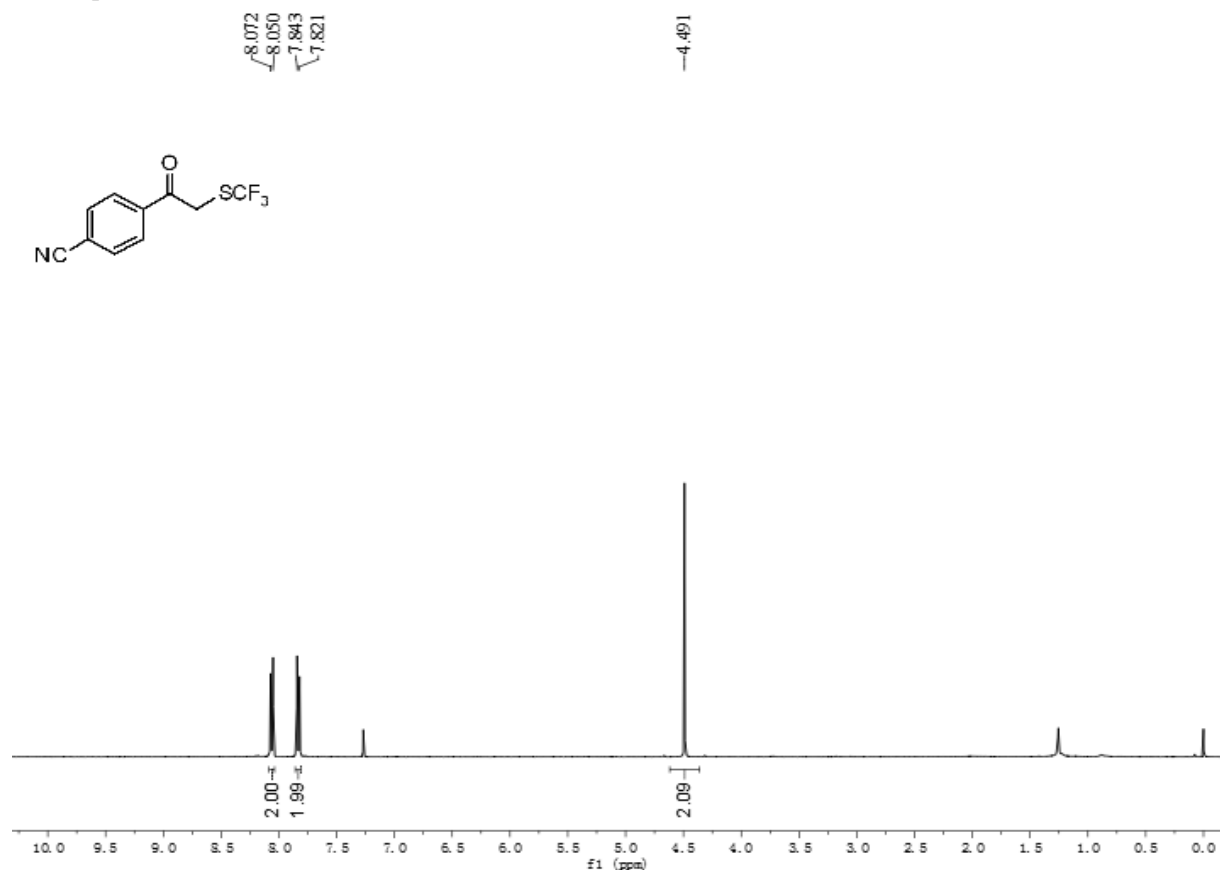

<sup>13</sup>C NMR spectra of **31**

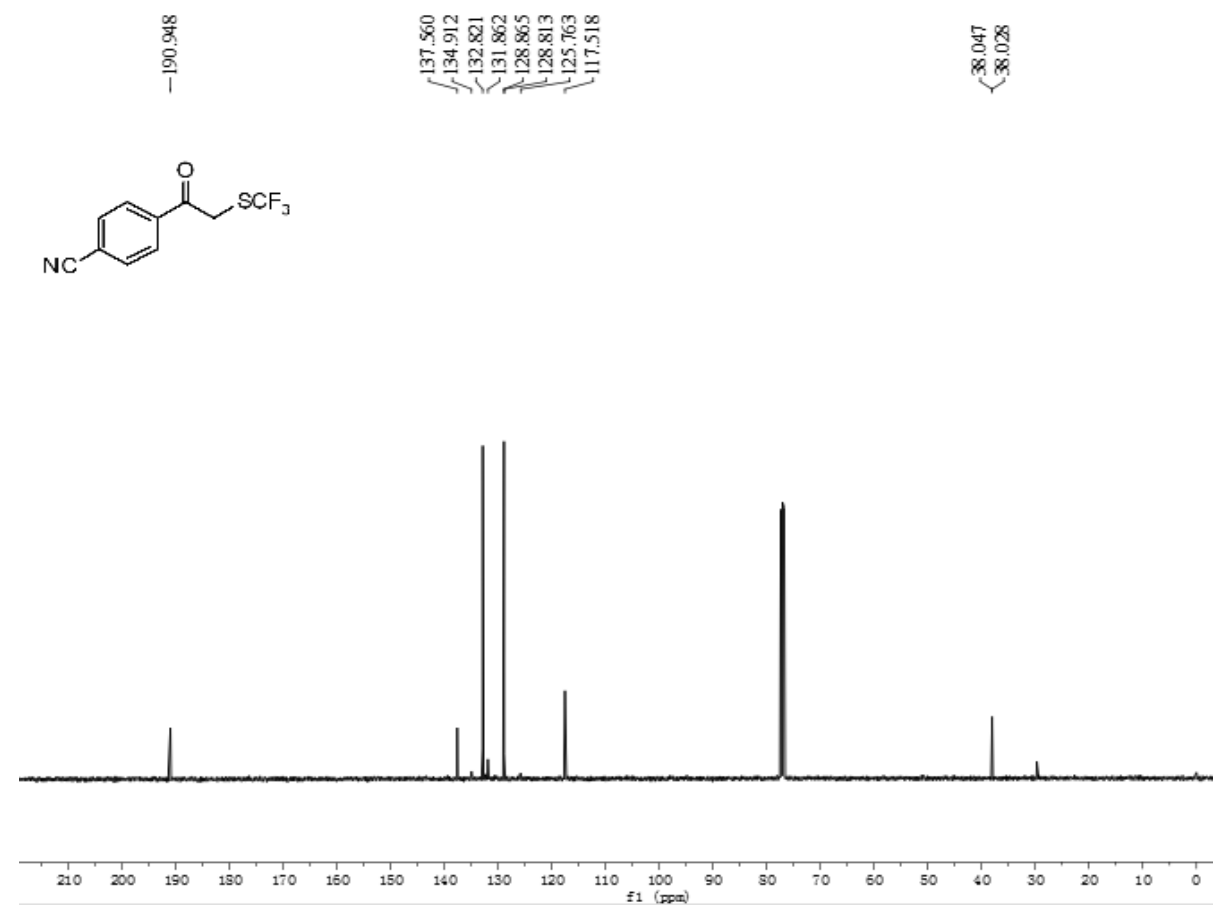

<sup>19</sup>F NMR spectra of **31**

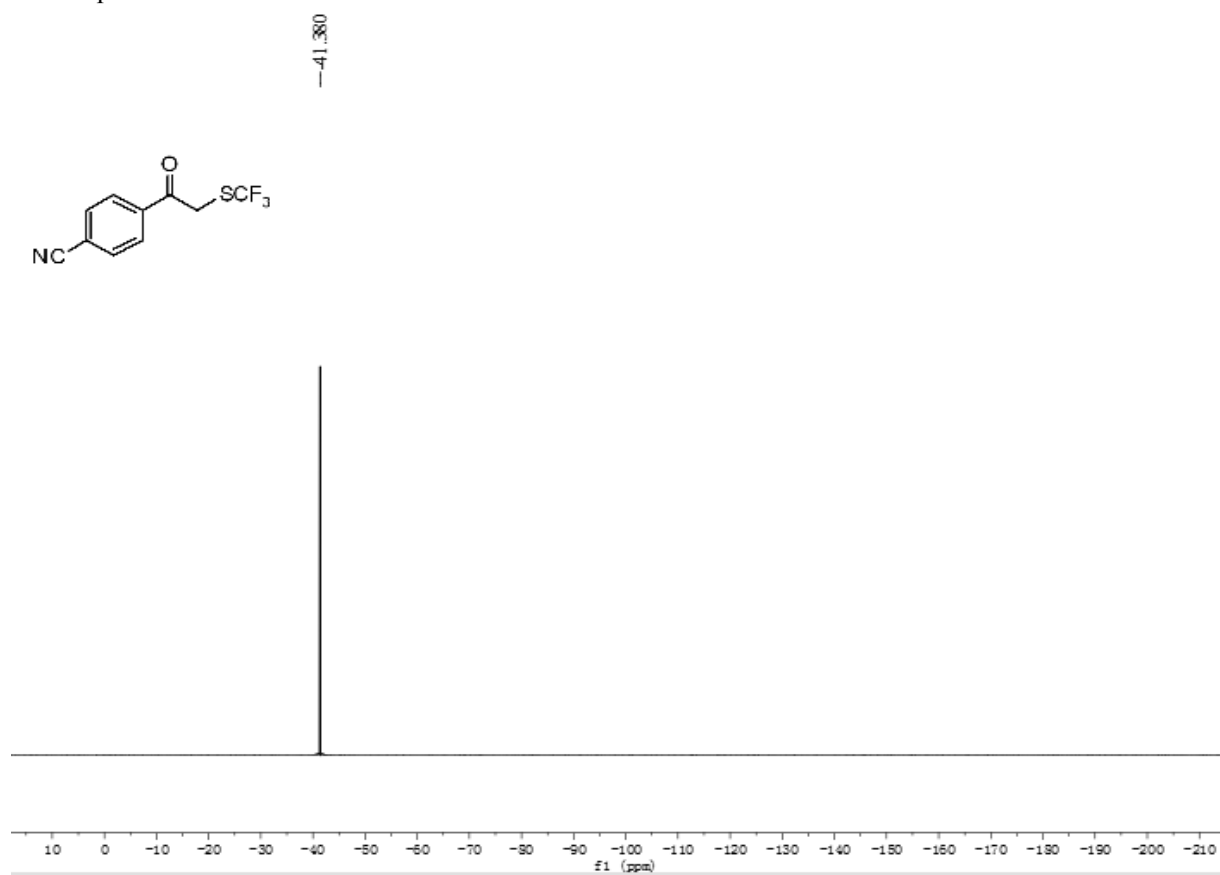

<sup>1</sup>H NMR spectra of **3m**

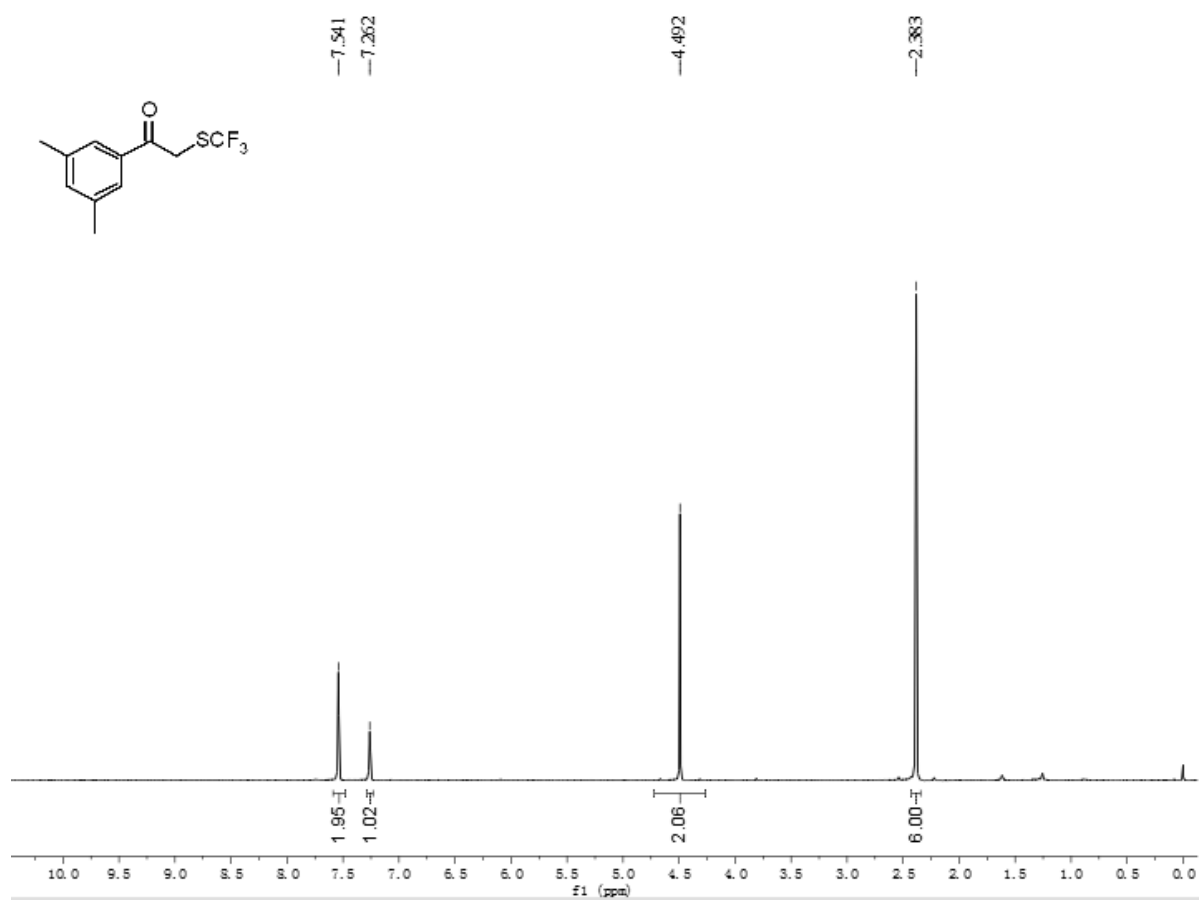

<sup>13</sup>C NMR spectra of **3m**

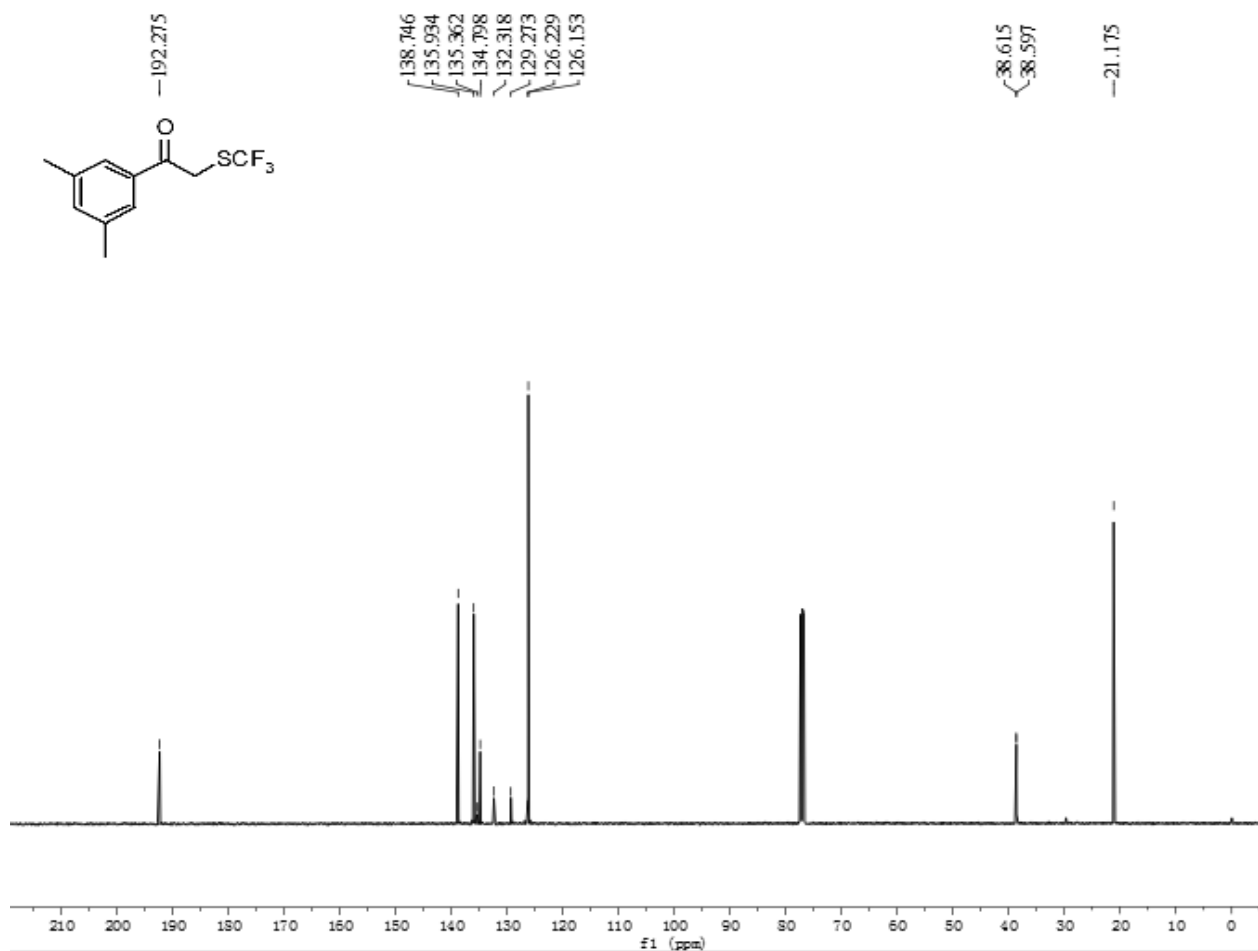

<sup>19</sup>F NMR spectra of **3m**

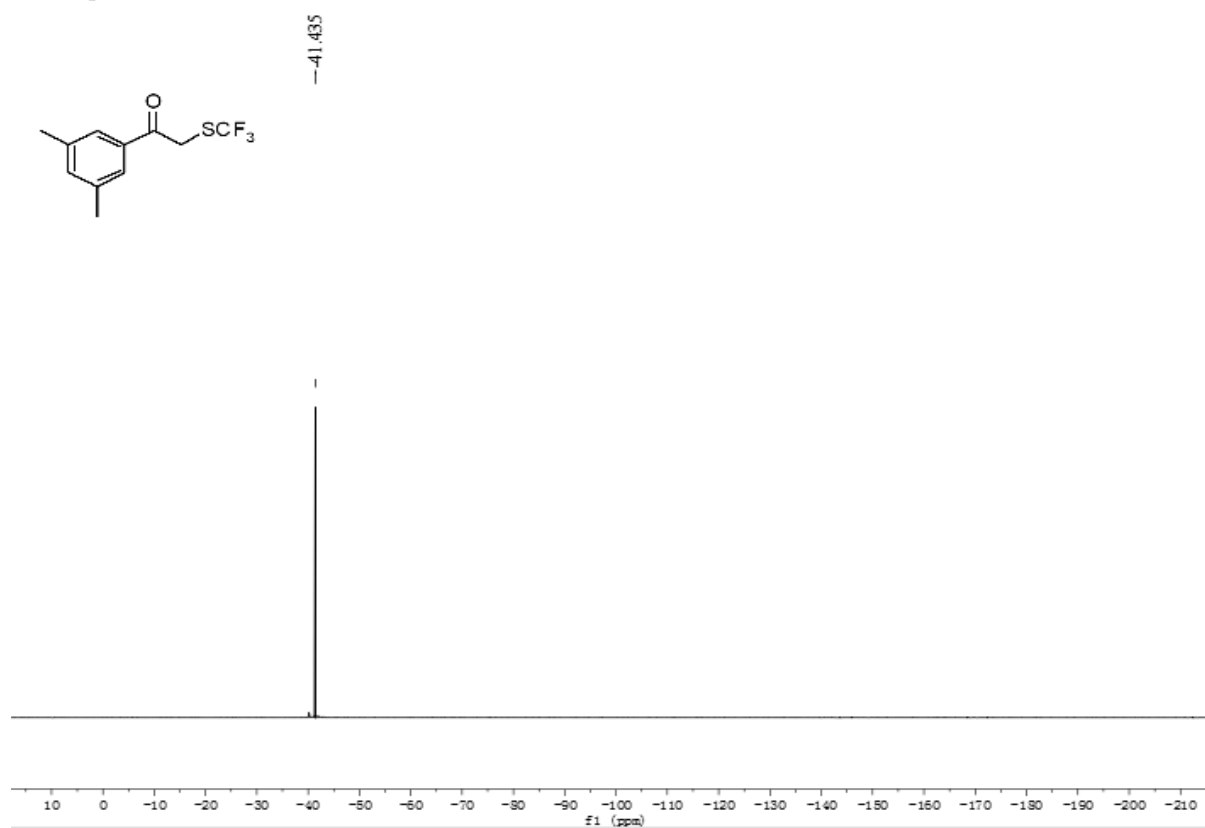

HRMS(EI) spectra of **3m**

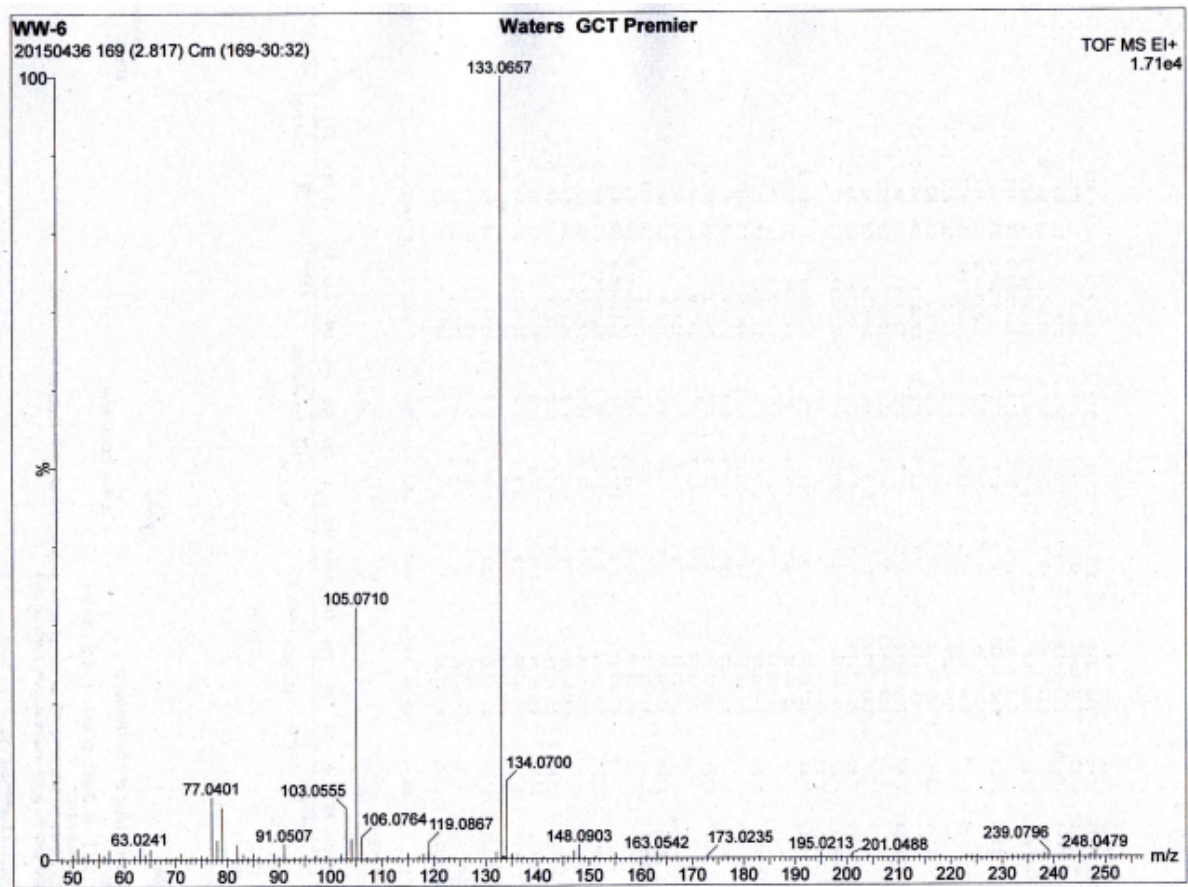

<sup>1</sup>H NMR spectra of **3n**

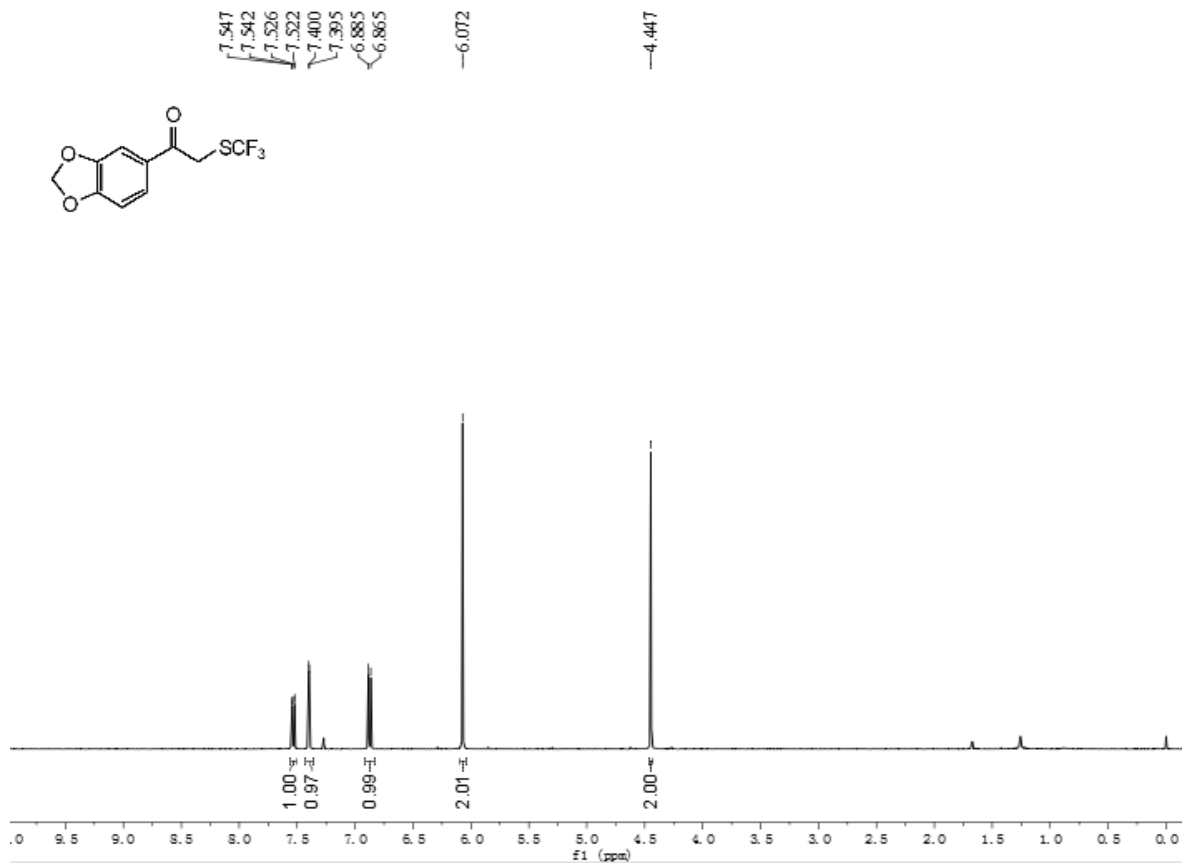



<sup>13</sup>C NMR spectra of **3n**

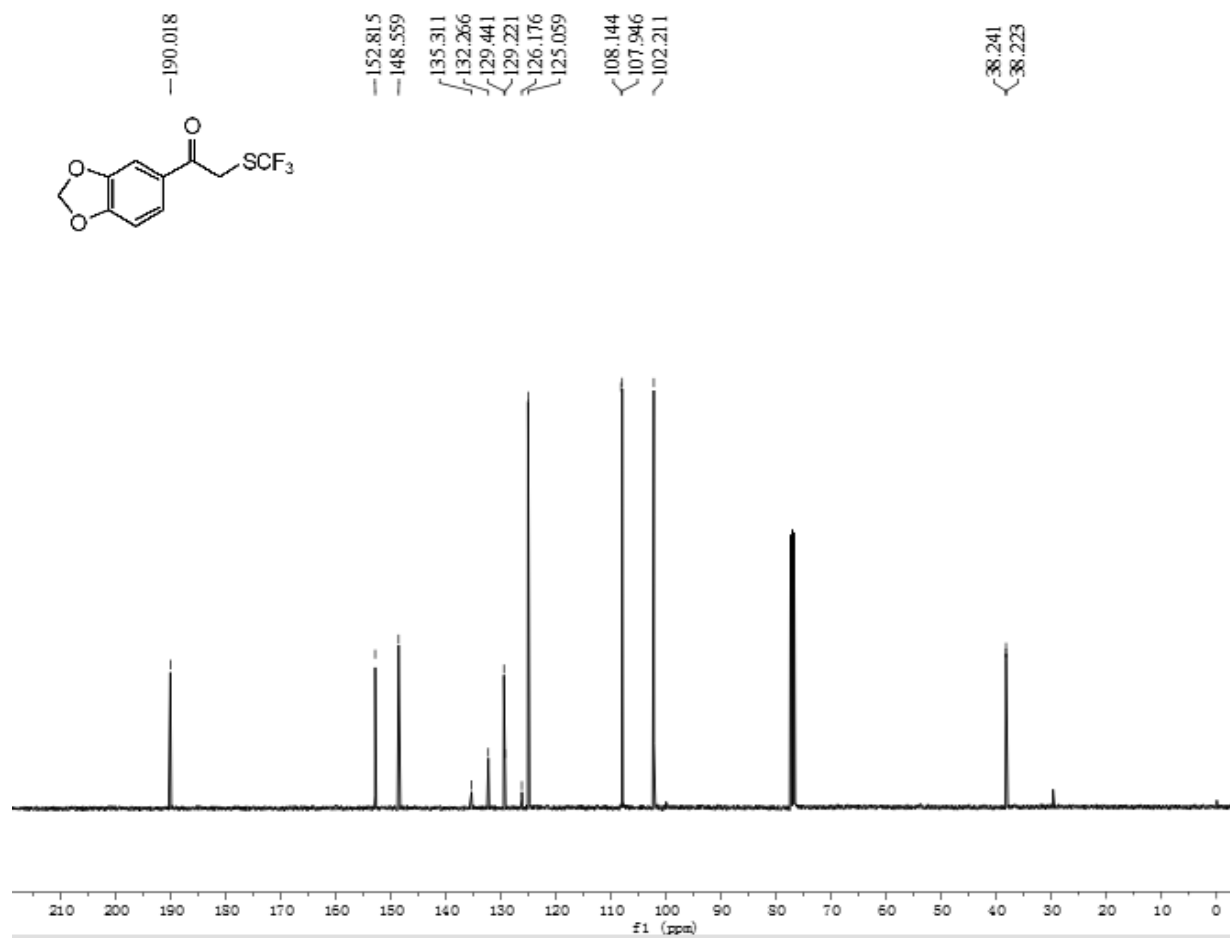

<sup>19</sup>F NMR spectra of **3n**

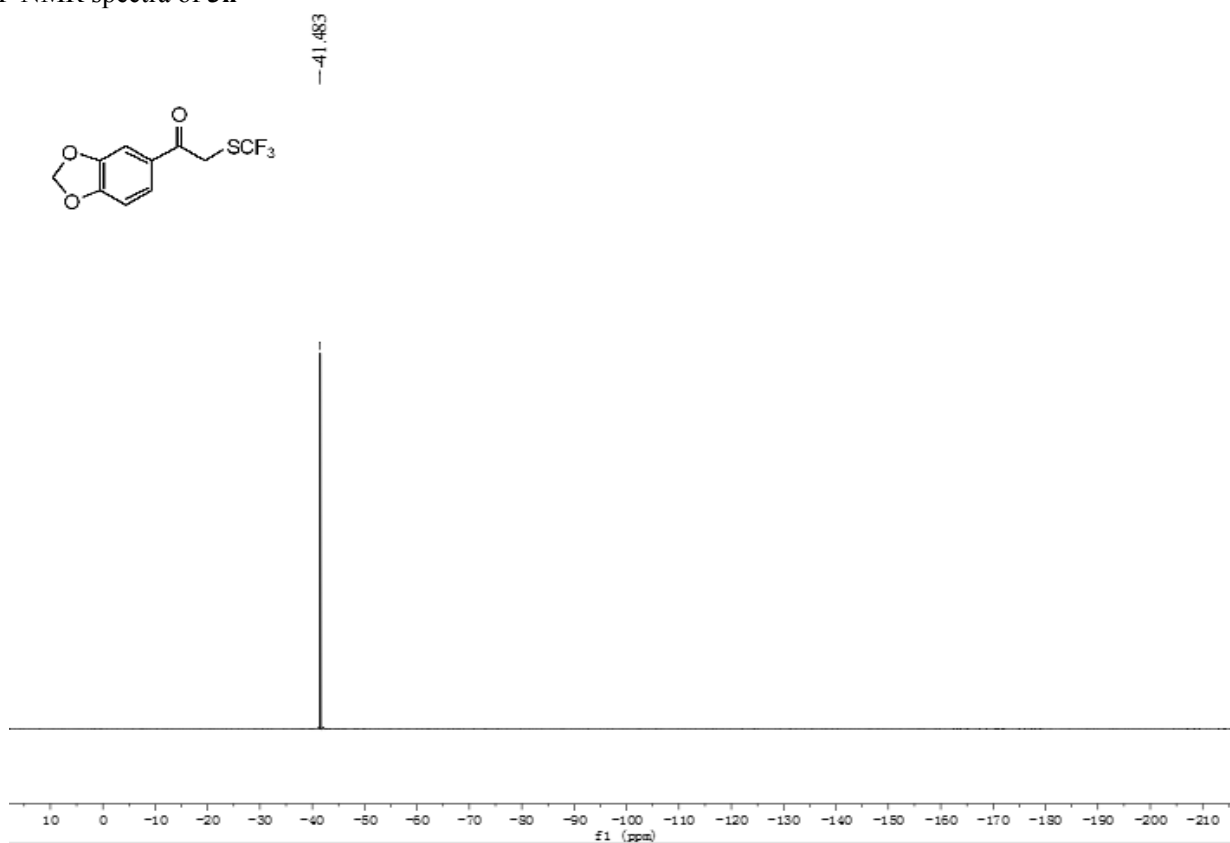

HRMS(EI) spectra of **3n**

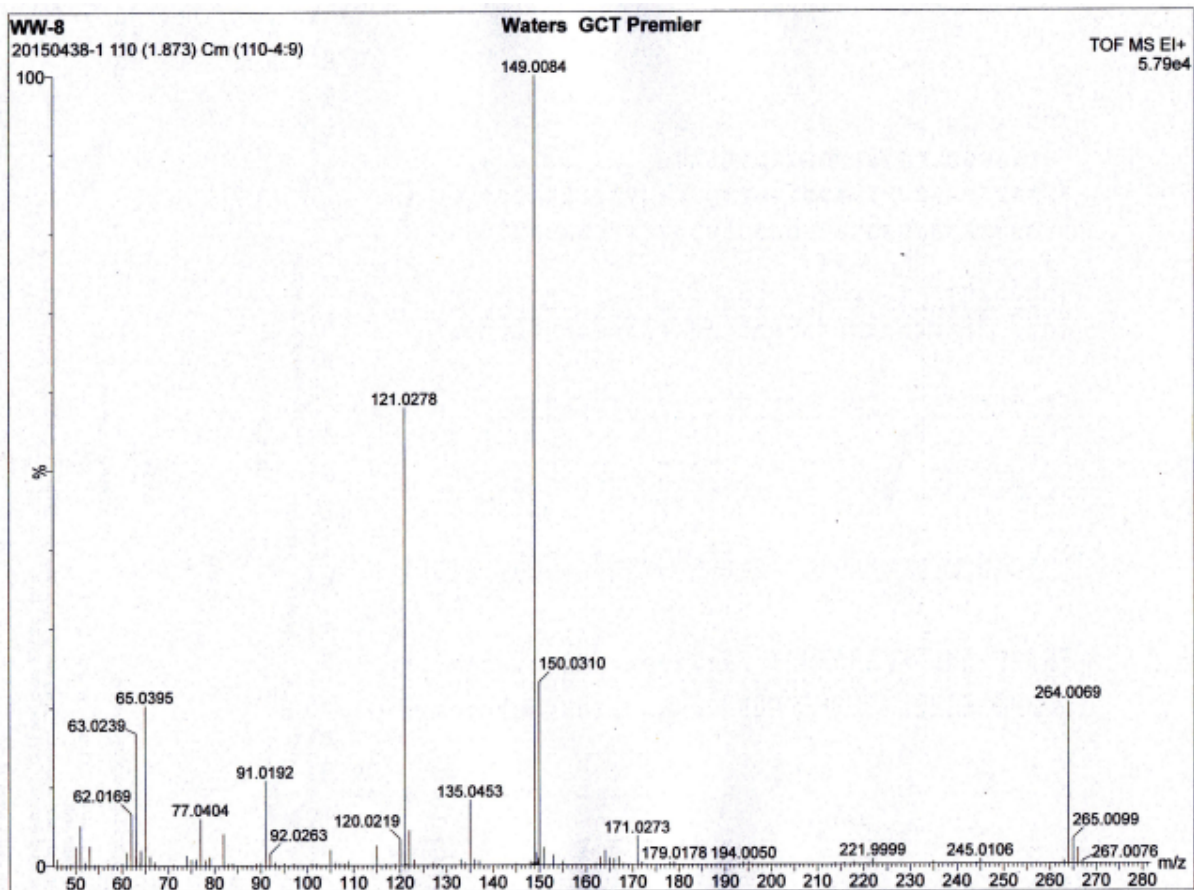

<sup>1</sup>H NMR spectra of **3o**

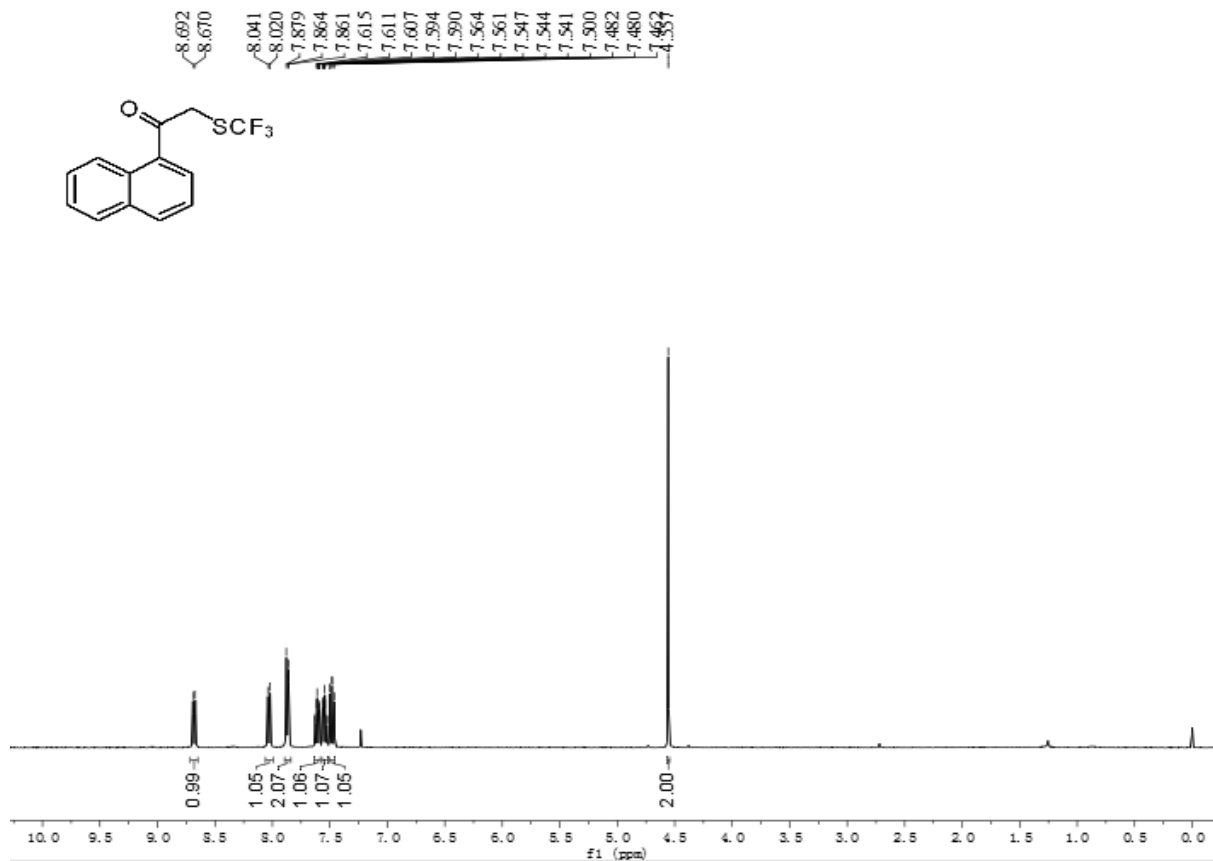

<sup>13</sup>C NMR spectra of **3o**

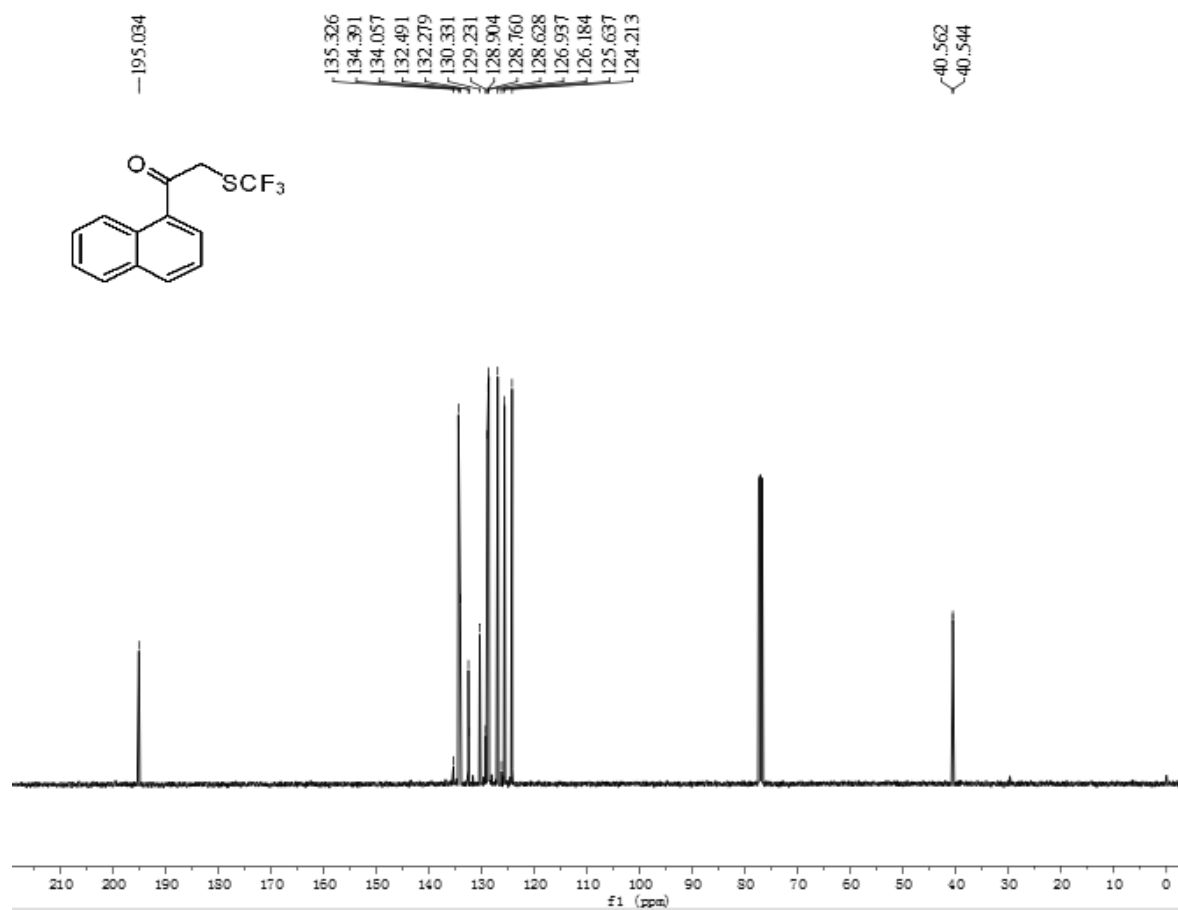

<sup>19</sup>F NMR spectra of **3o**

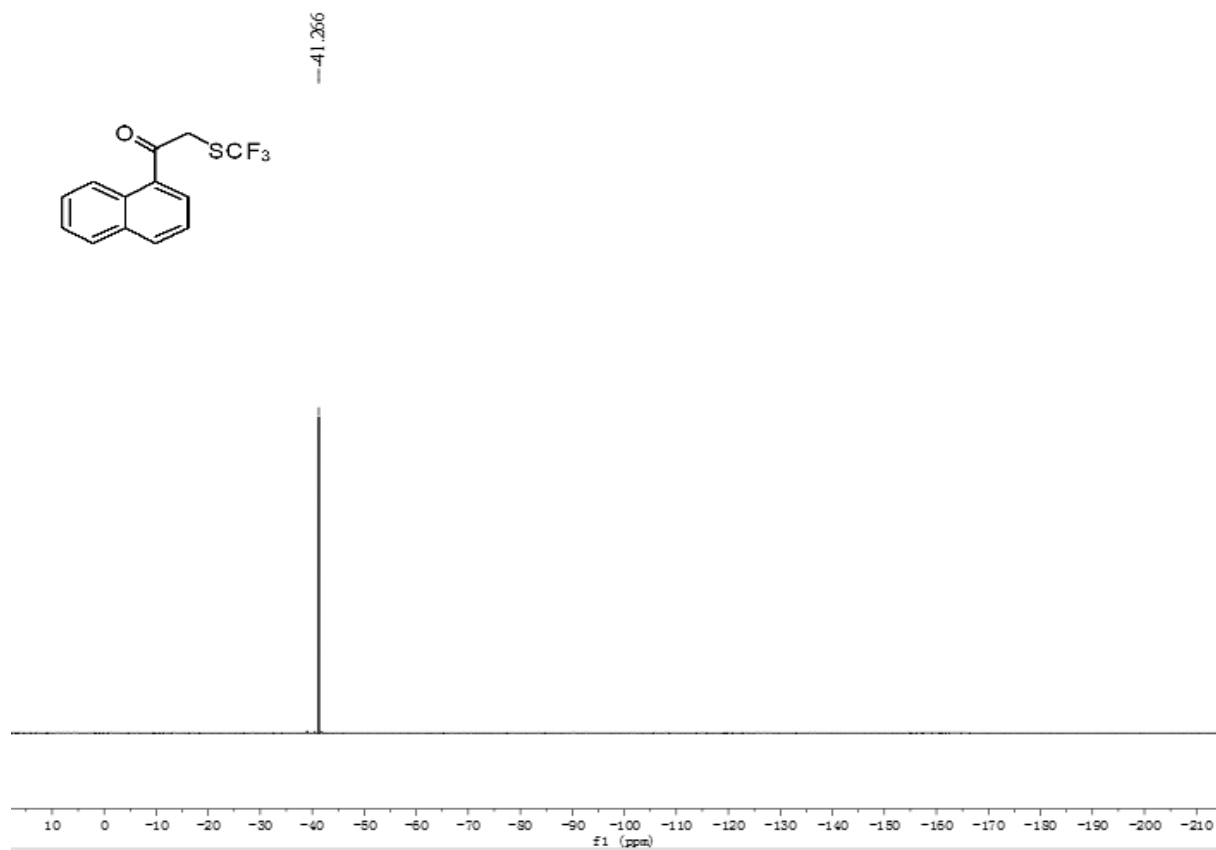

HRMS(EI) spectra of **3o**

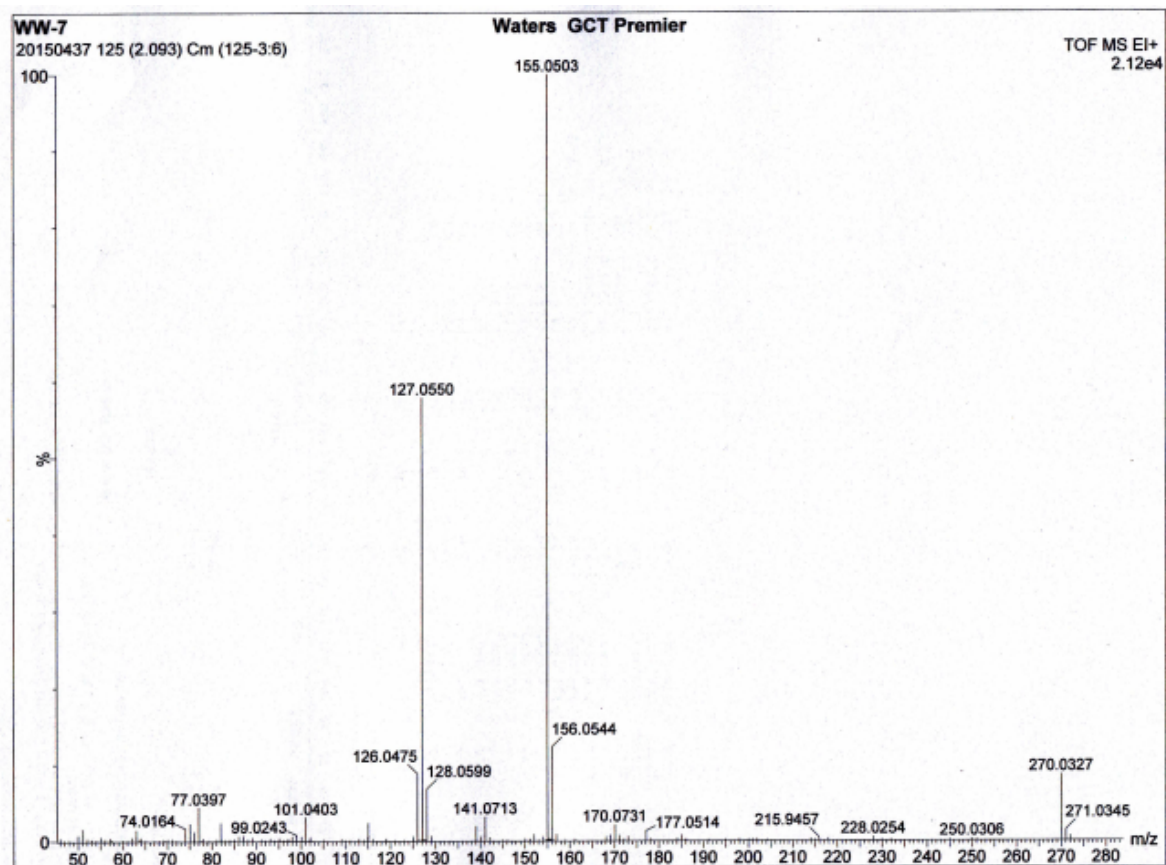

<sup>1</sup>H NMR spectra of **3p**

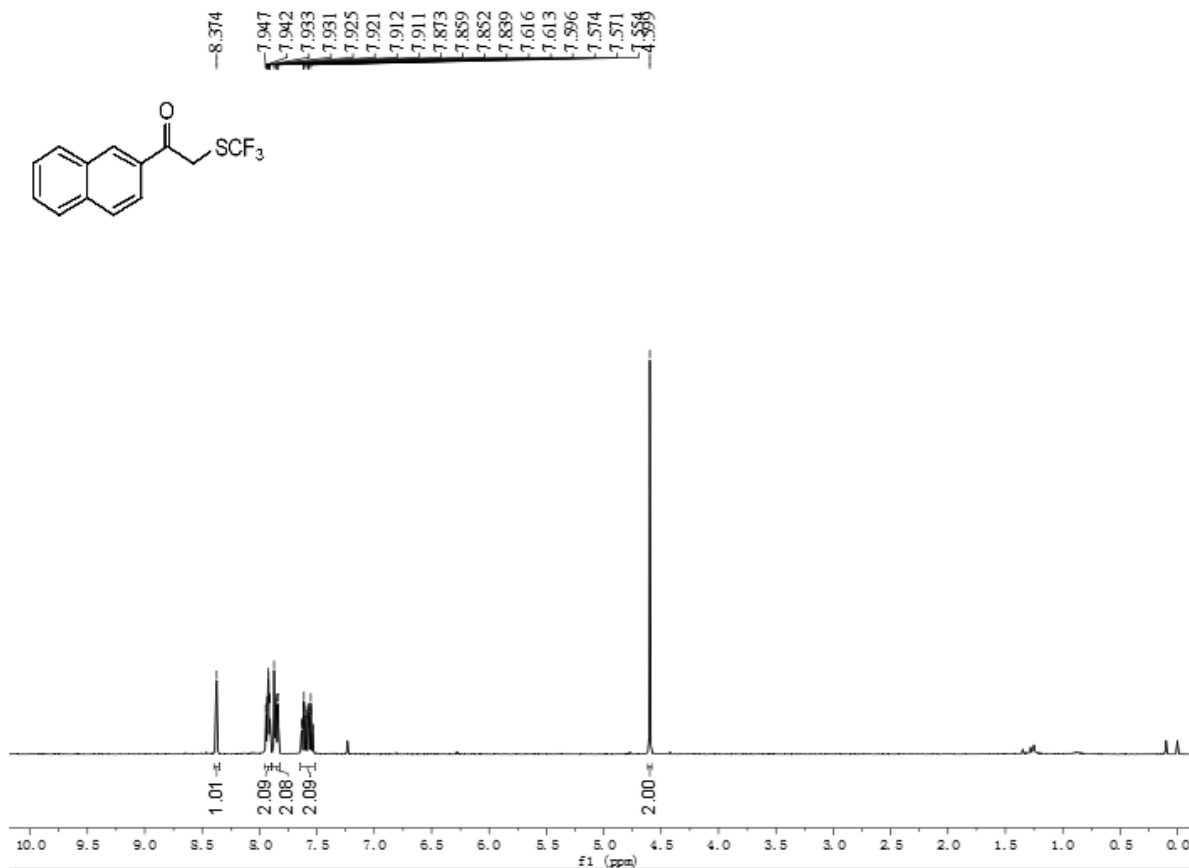

<sup>13</sup>C NMR spectra of **3p**

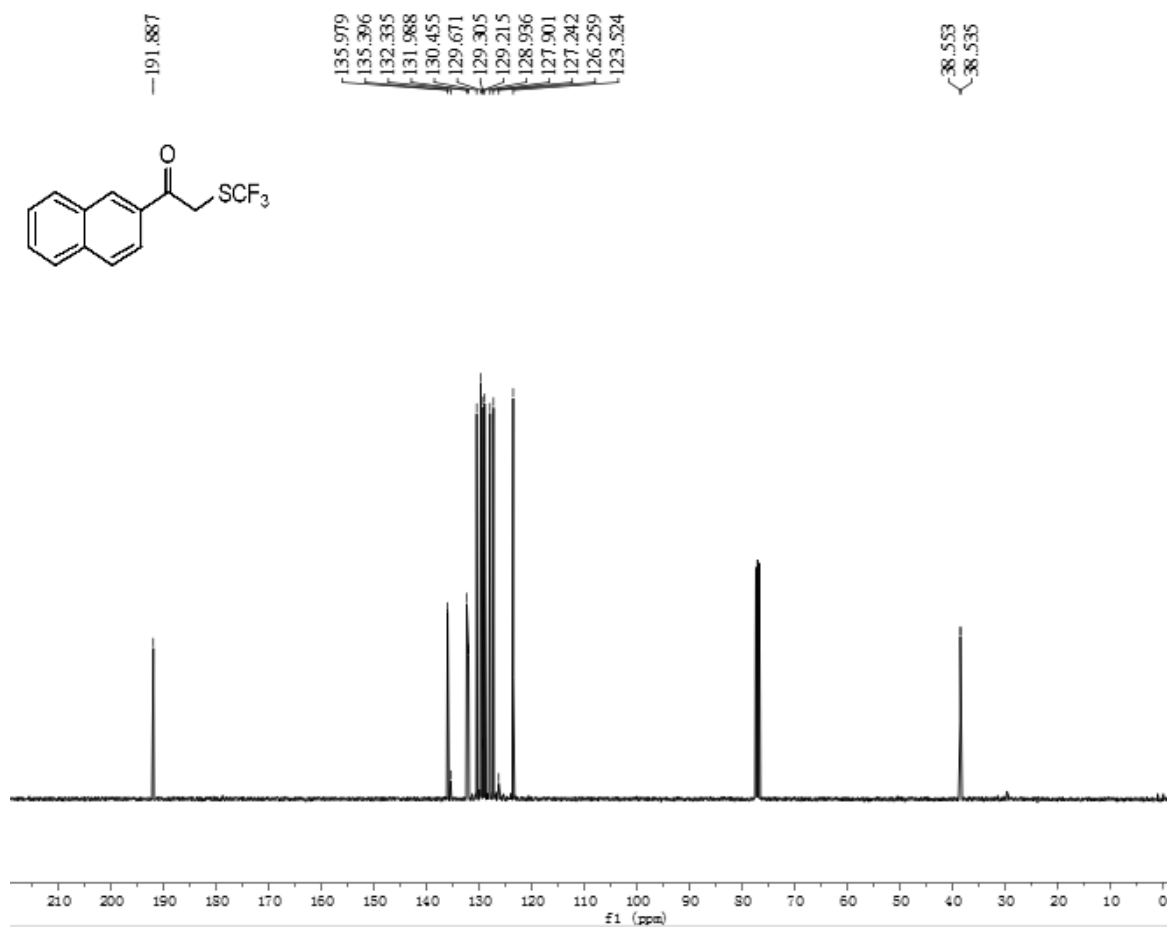

<sup>19</sup>F NMR spectra of **3p**

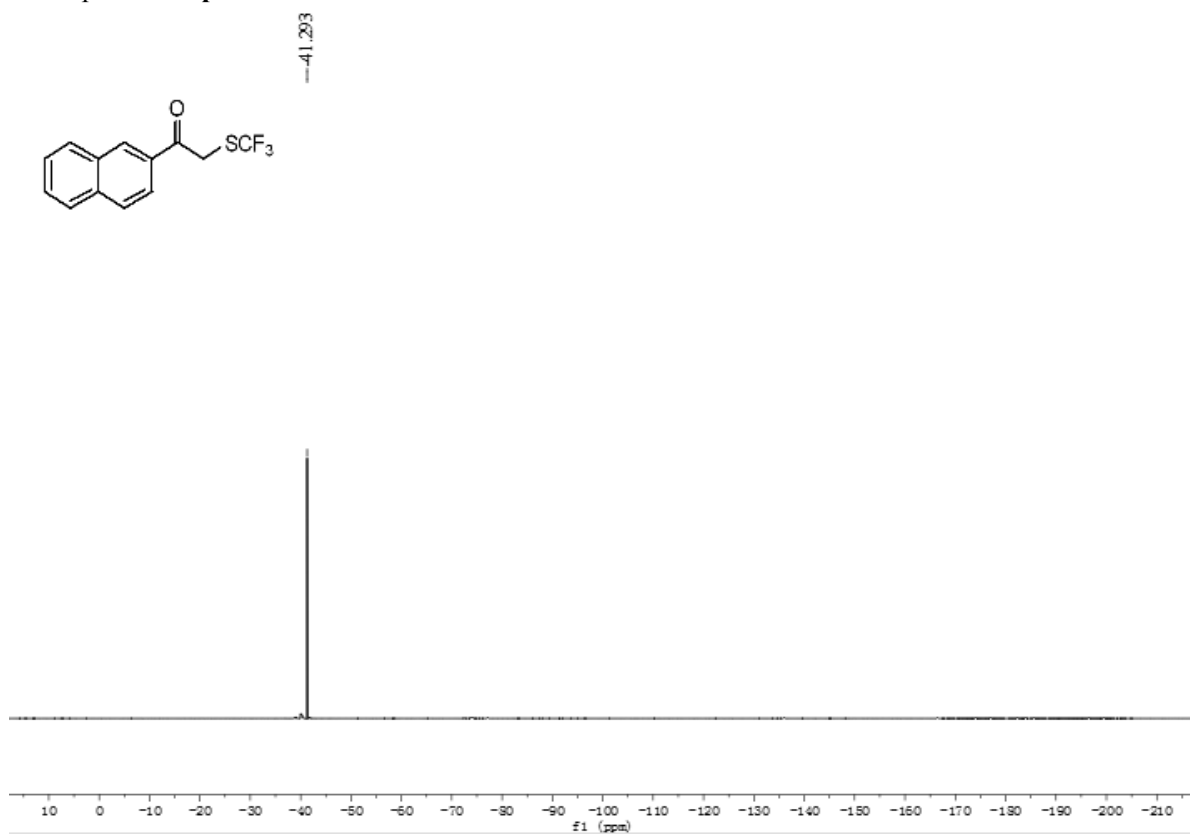

<sup>1</sup>H NMR spectra of **3q**

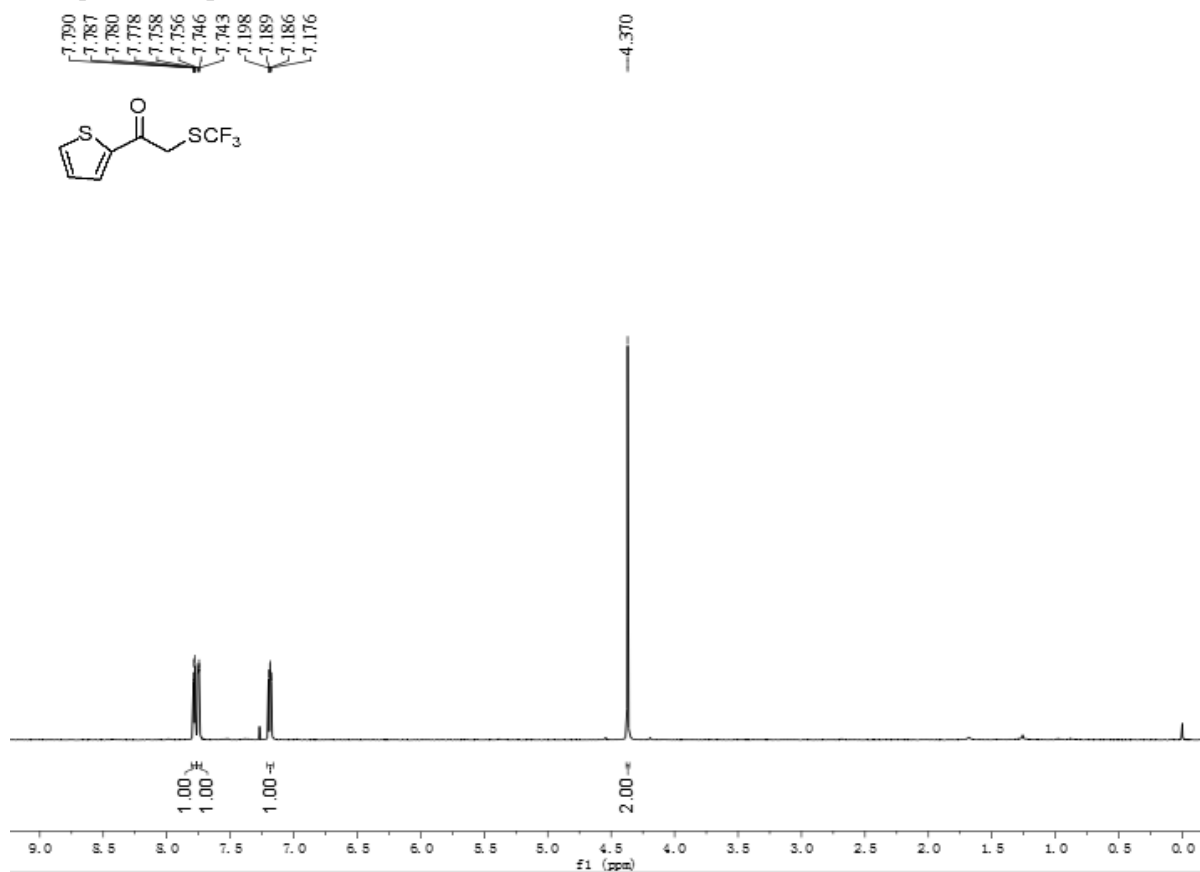

<sup>13</sup>C NMR spectra of **3q**

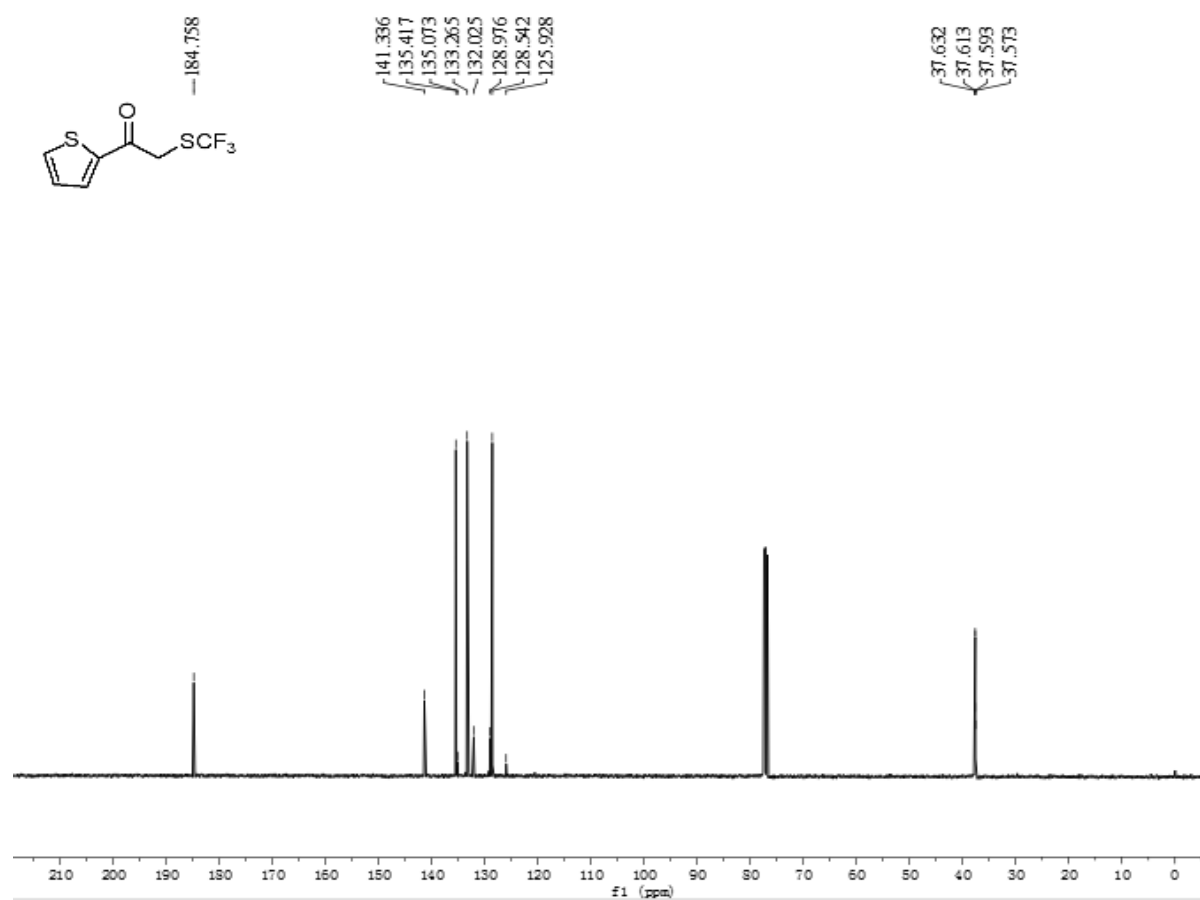

<sup>19</sup>F NMR spectra of **3q**

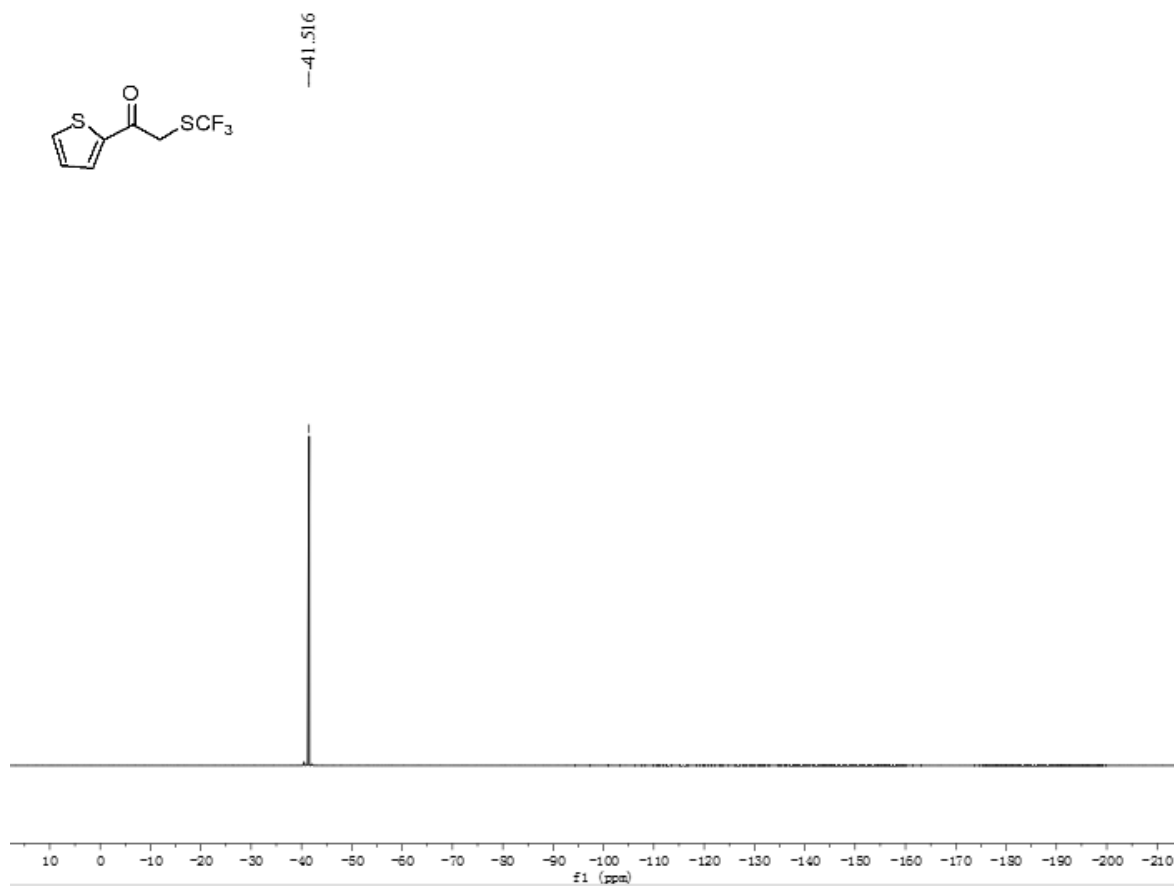

HRMS(EI) spectra of **3q**

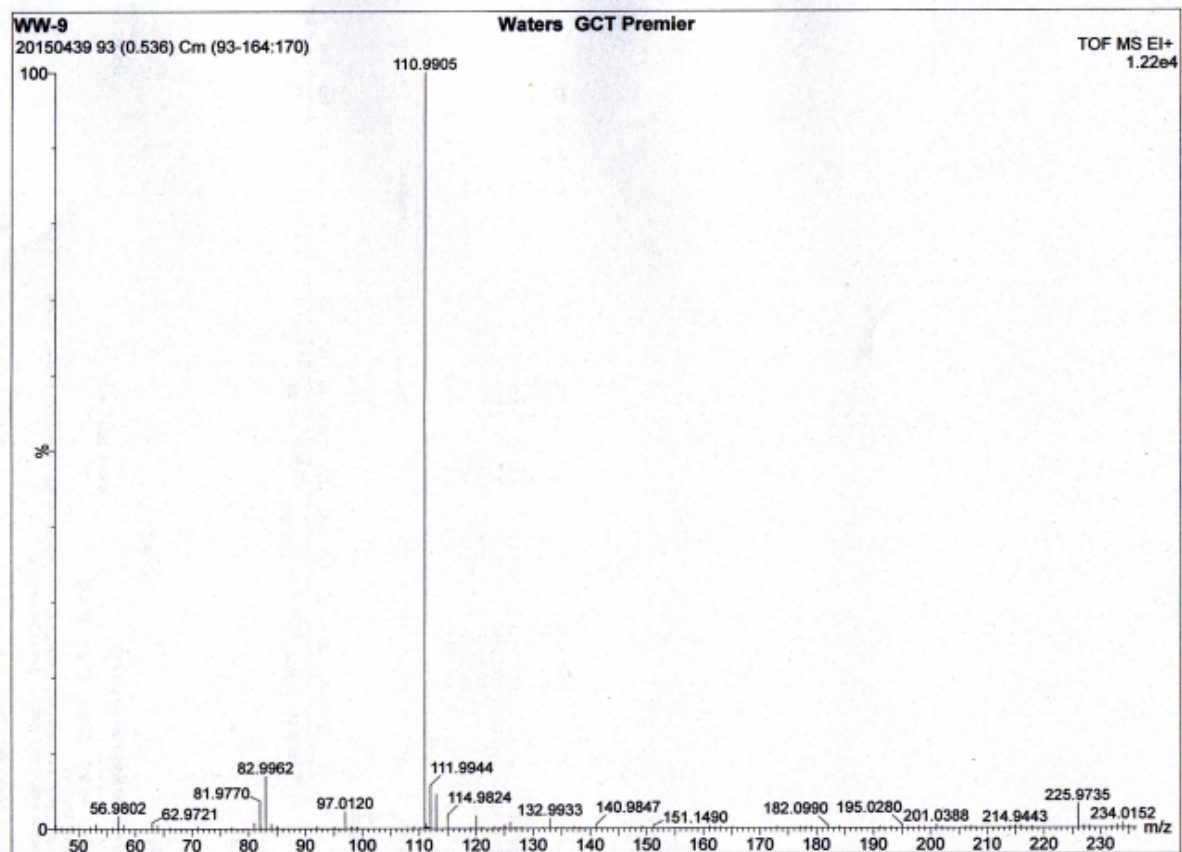

<sup>1</sup>H NMR spectra of **3r**

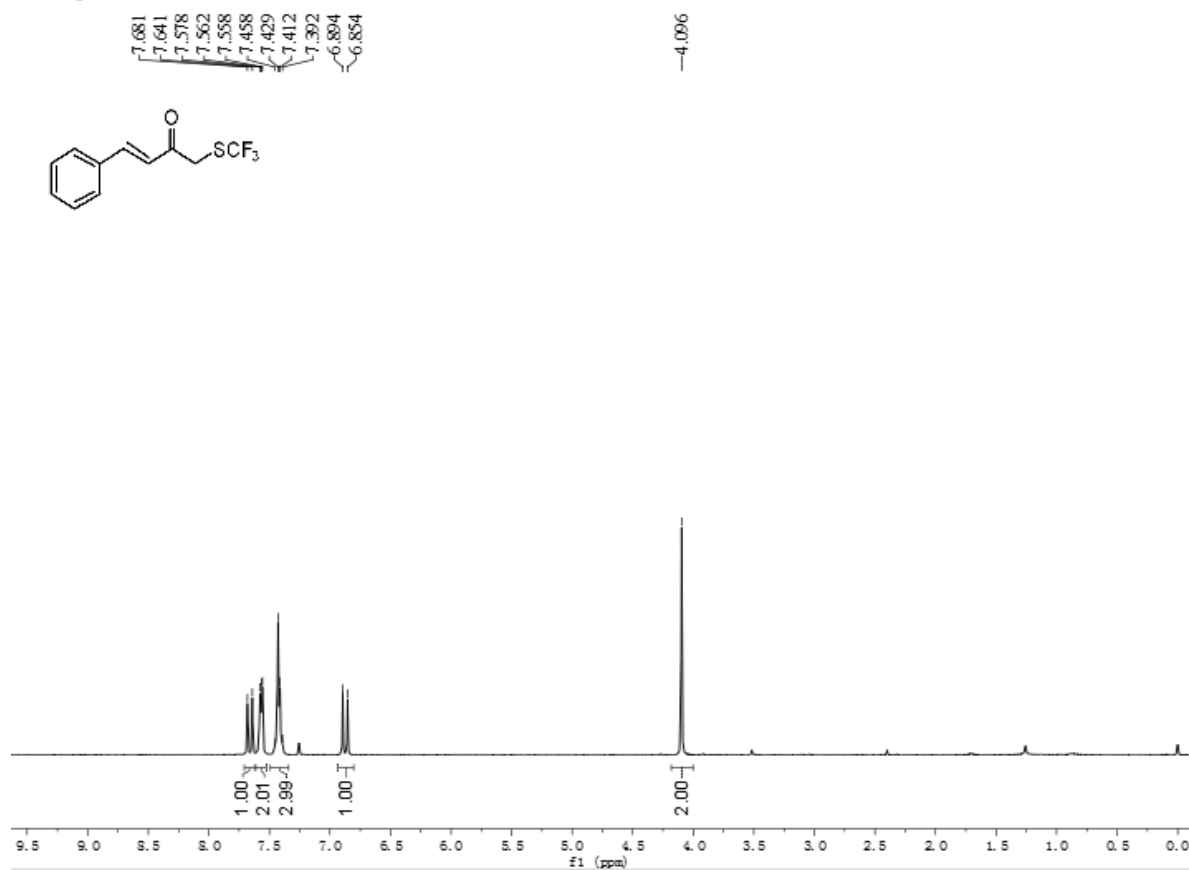

<sup>13</sup>C NMR spectra of **3r**

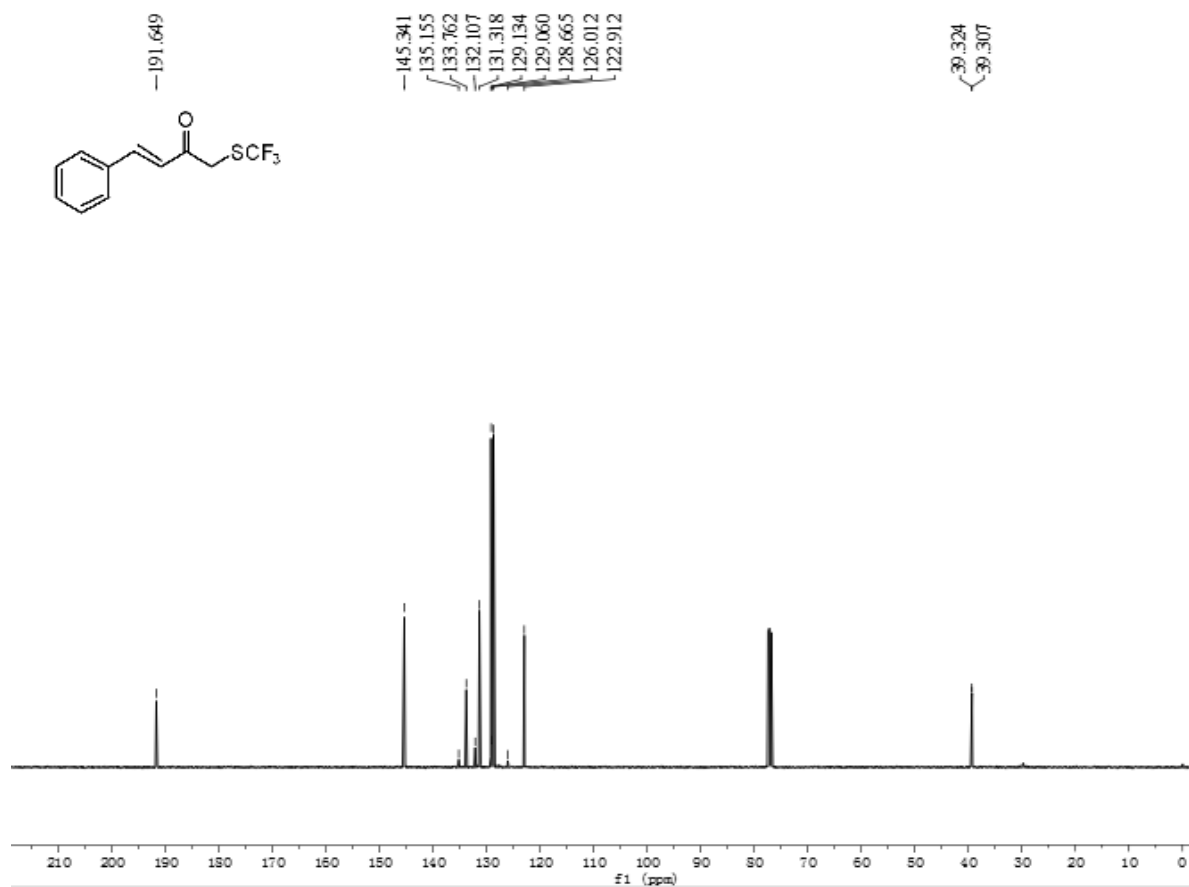



<sup>19</sup>F NMR spectra of **3r**

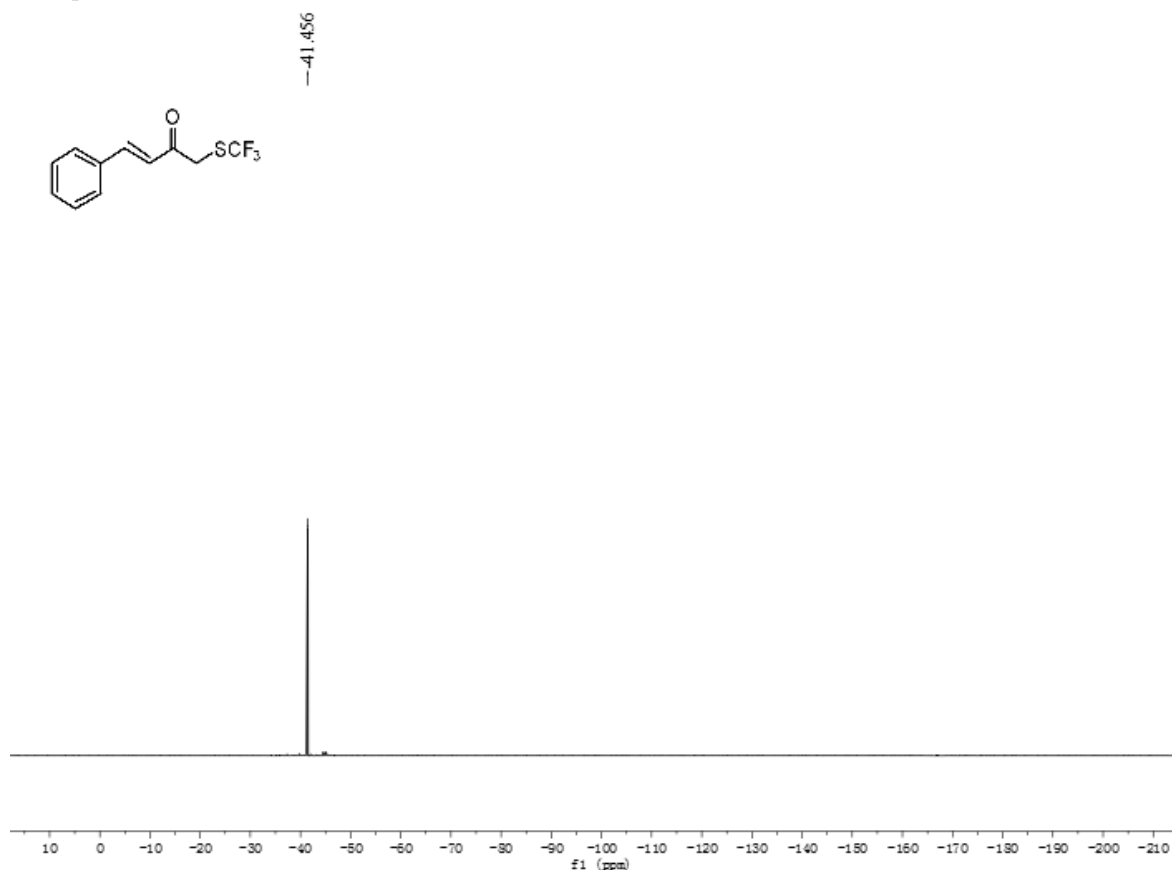

HRMS(EI) spectra of **3r**

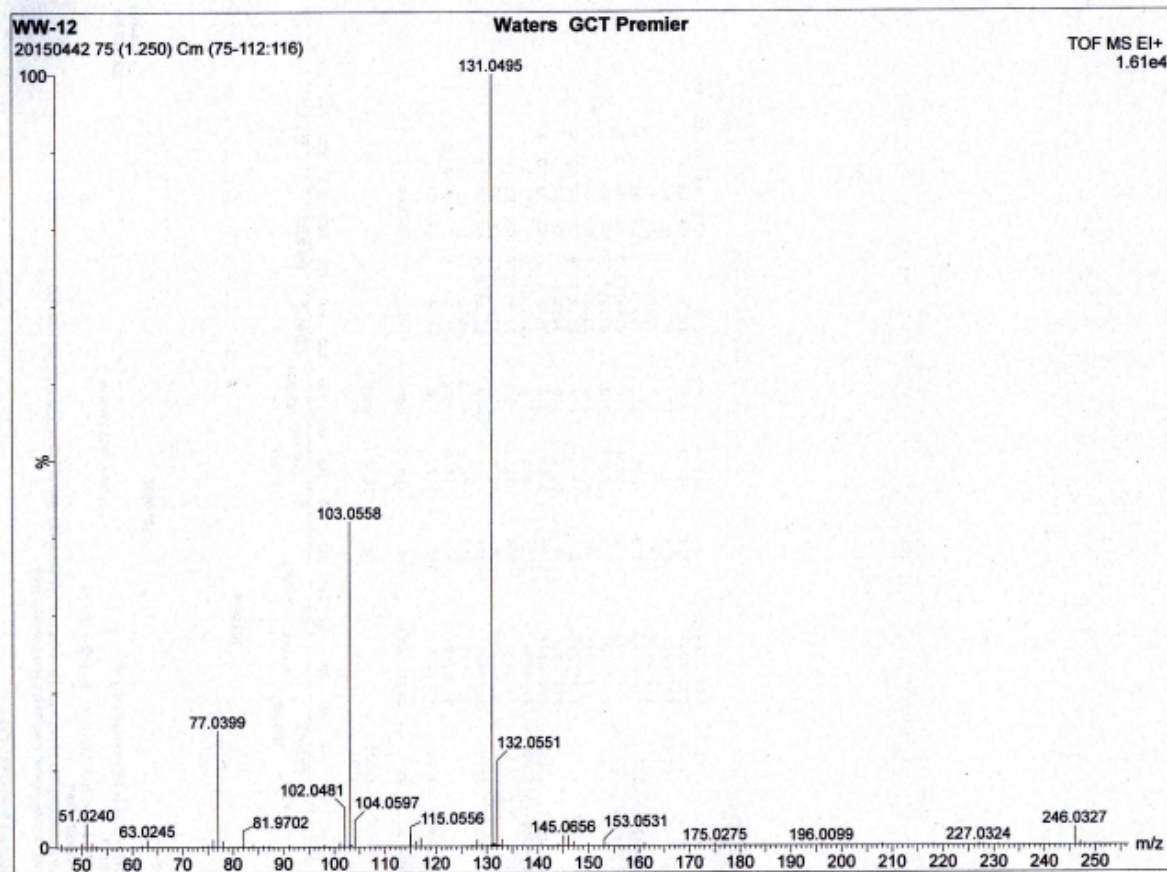

<sup>1</sup>H NMR spectra of **3s**

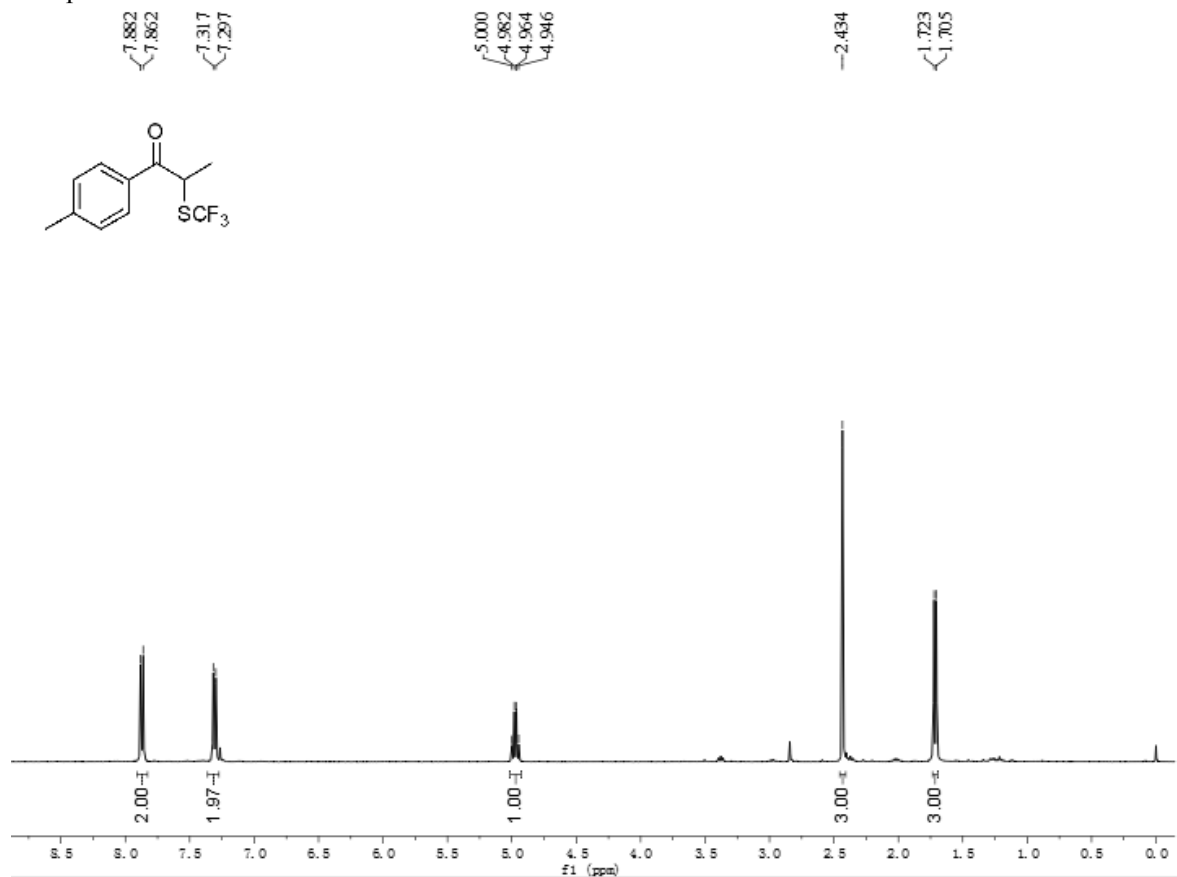

<sup>13</sup>C NMR spectra of **3s**

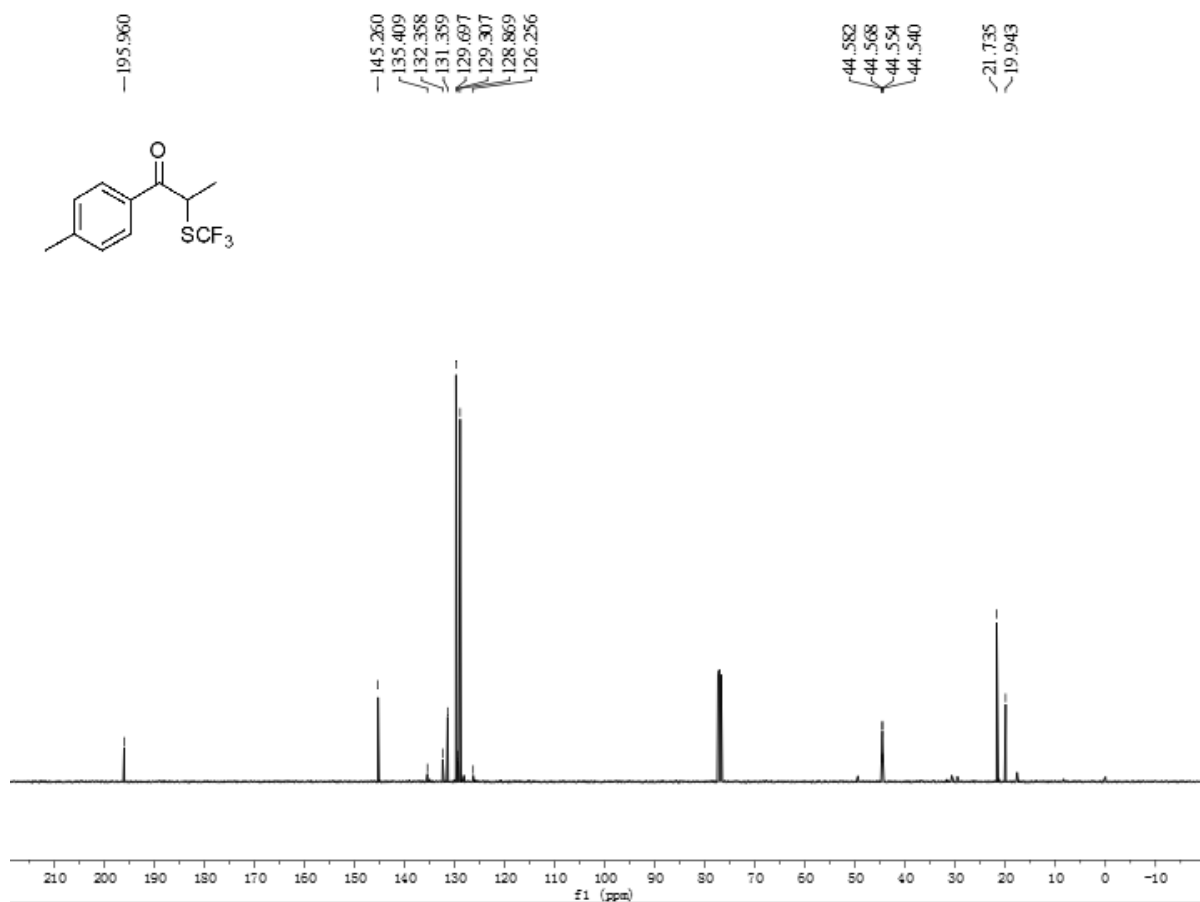

<sup>19</sup>F NMR spectra of **3s**

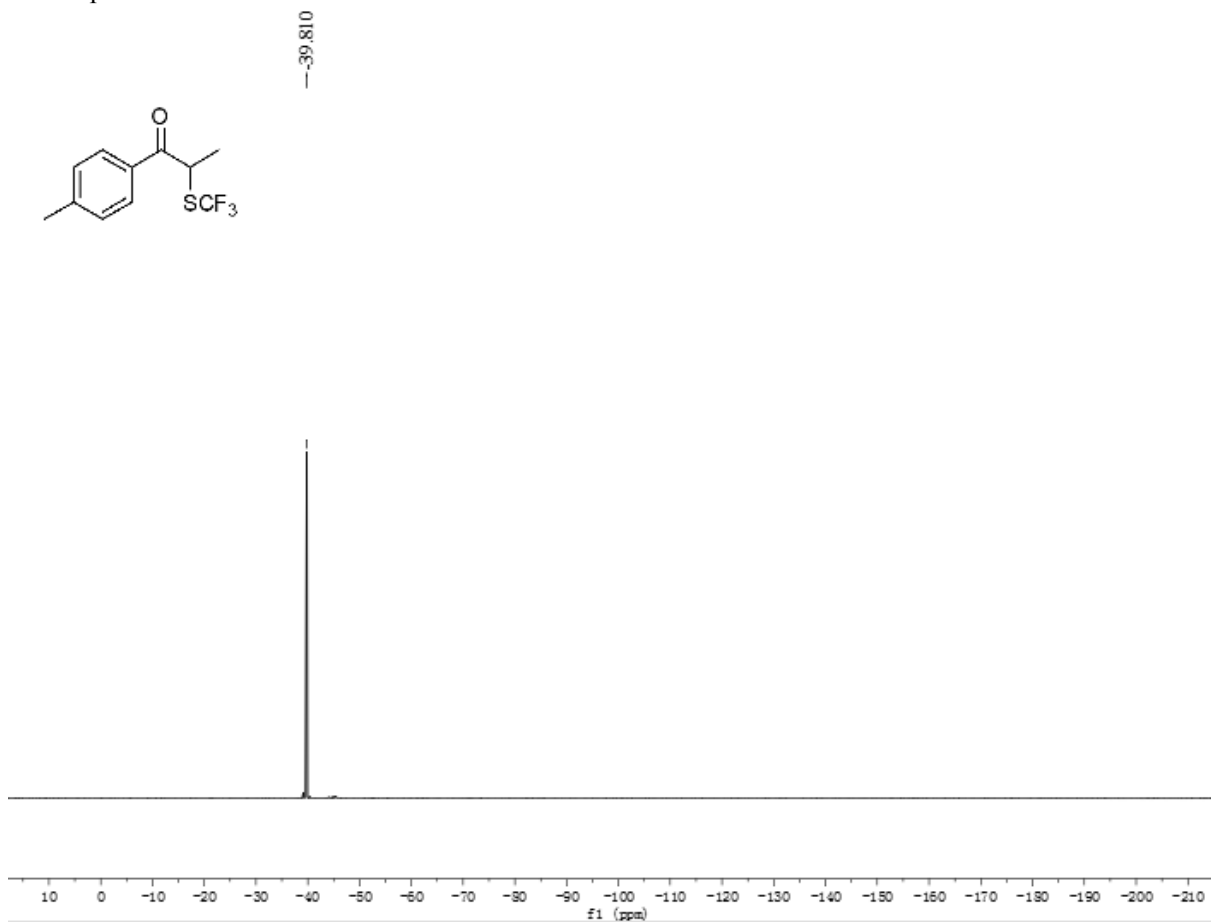

HRMS(EI) spectra of **3s**

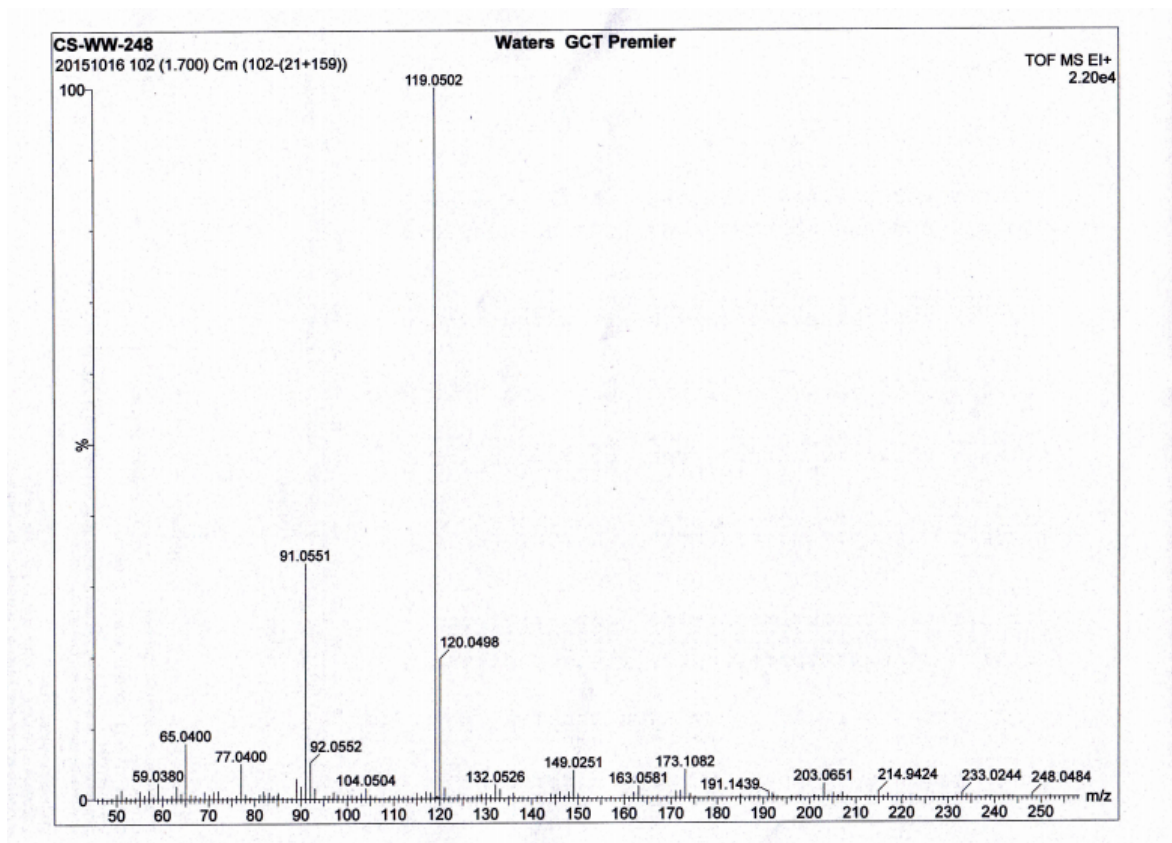

<sup>1</sup>H NMR spectra of **3t**

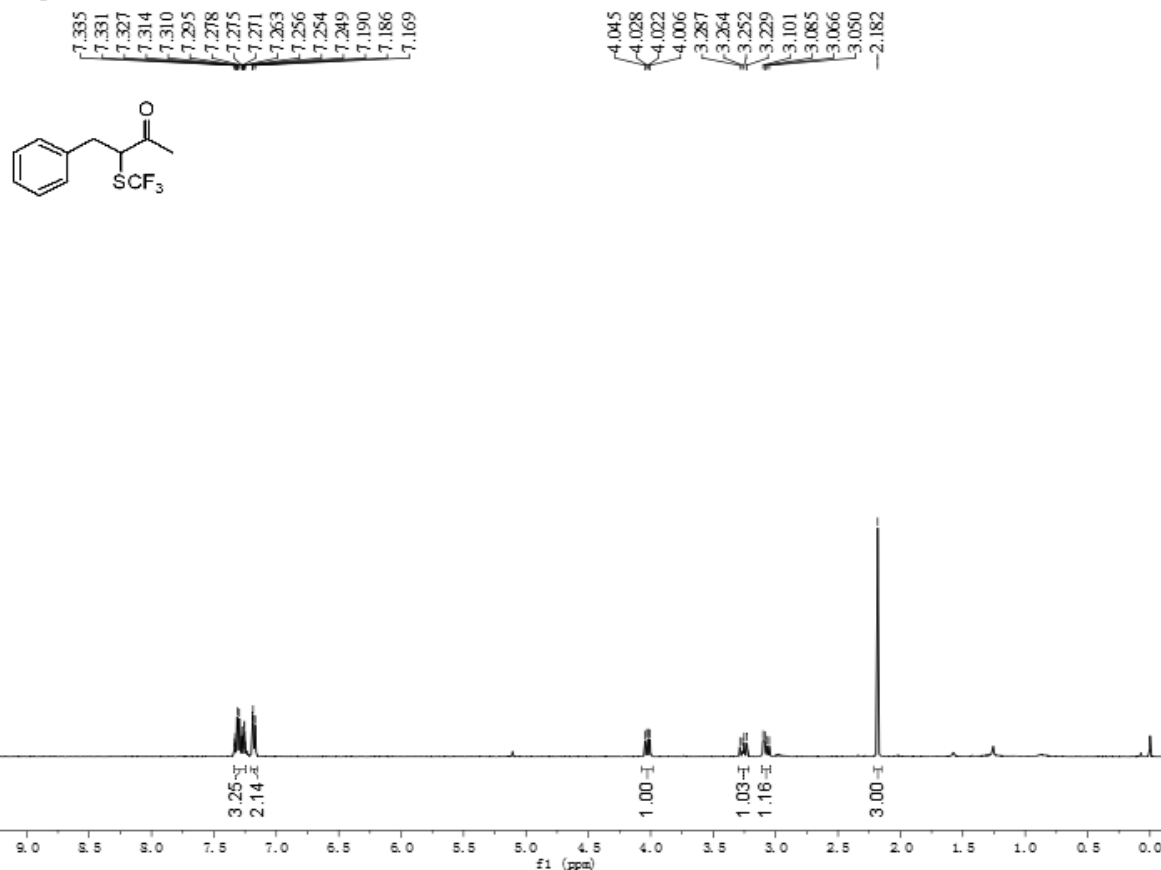

<sup>13</sup>C NMR spectra of **3t**

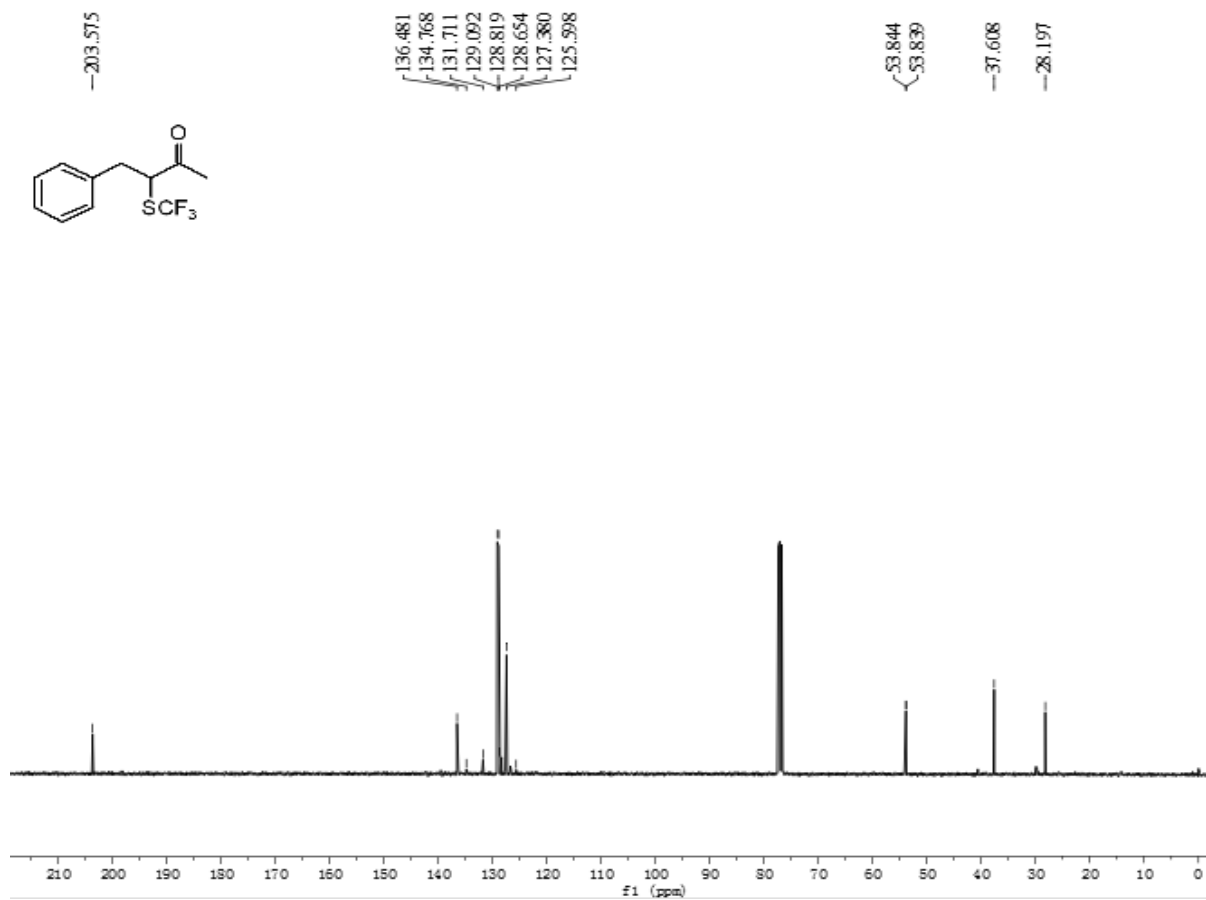

<sup>19</sup>F NMR spectra of **3t**

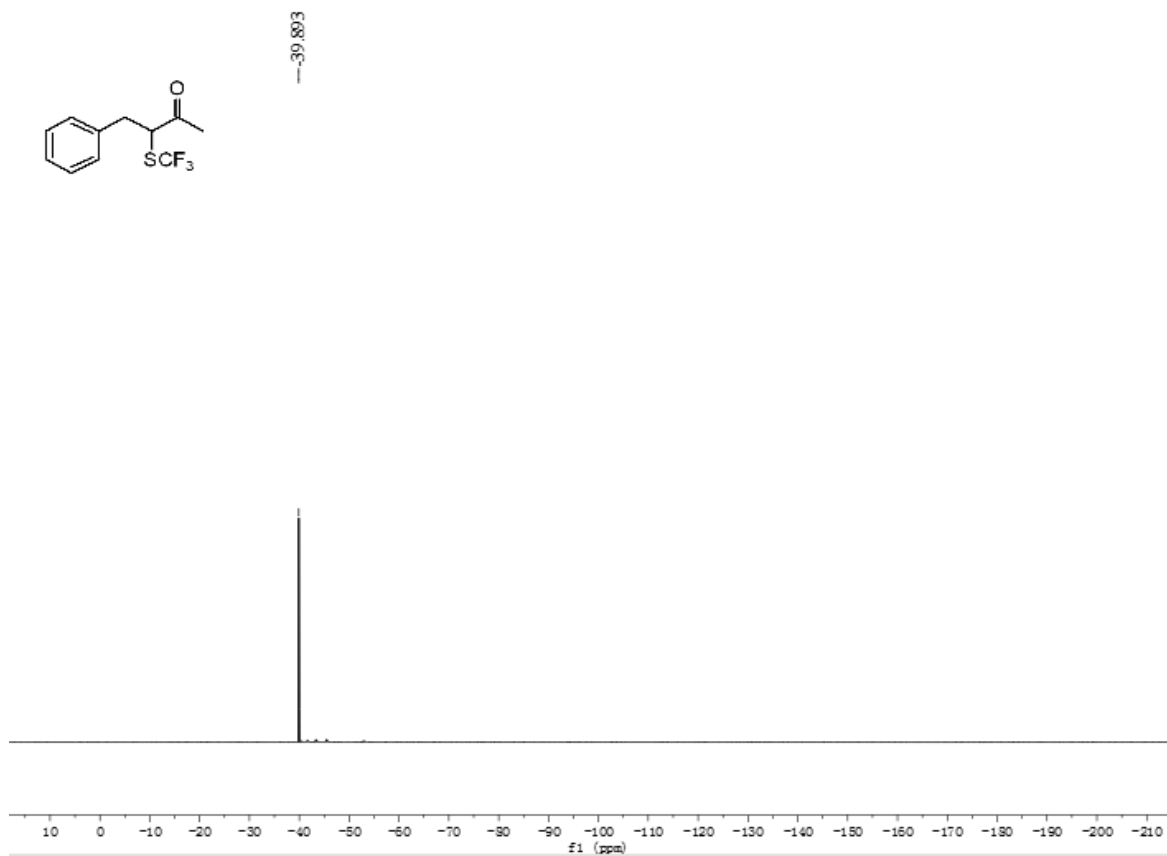

HRMS(EI) spectra of **3t**

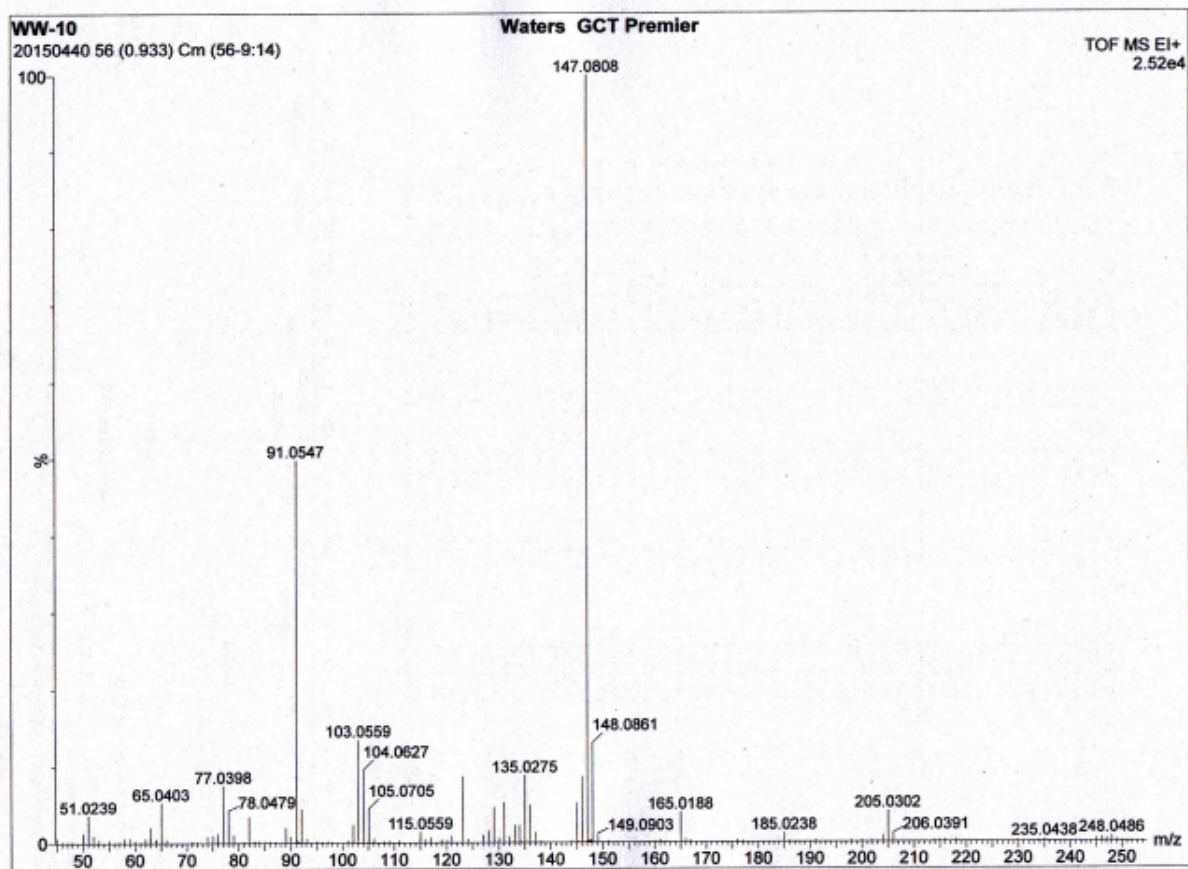

<sup>1</sup>H NMR spectra of **3u**

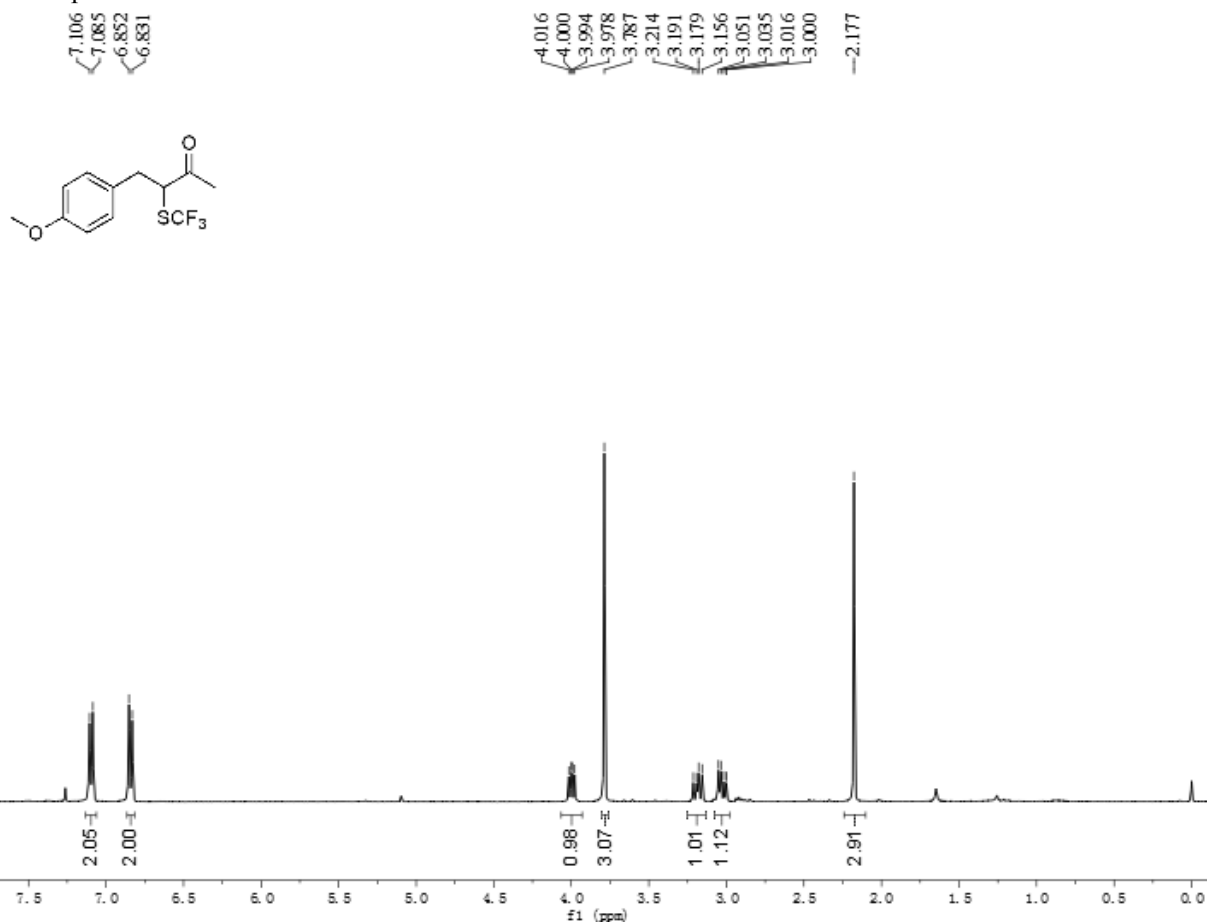

<sup>13</sup>C NMR spectra of **3u**

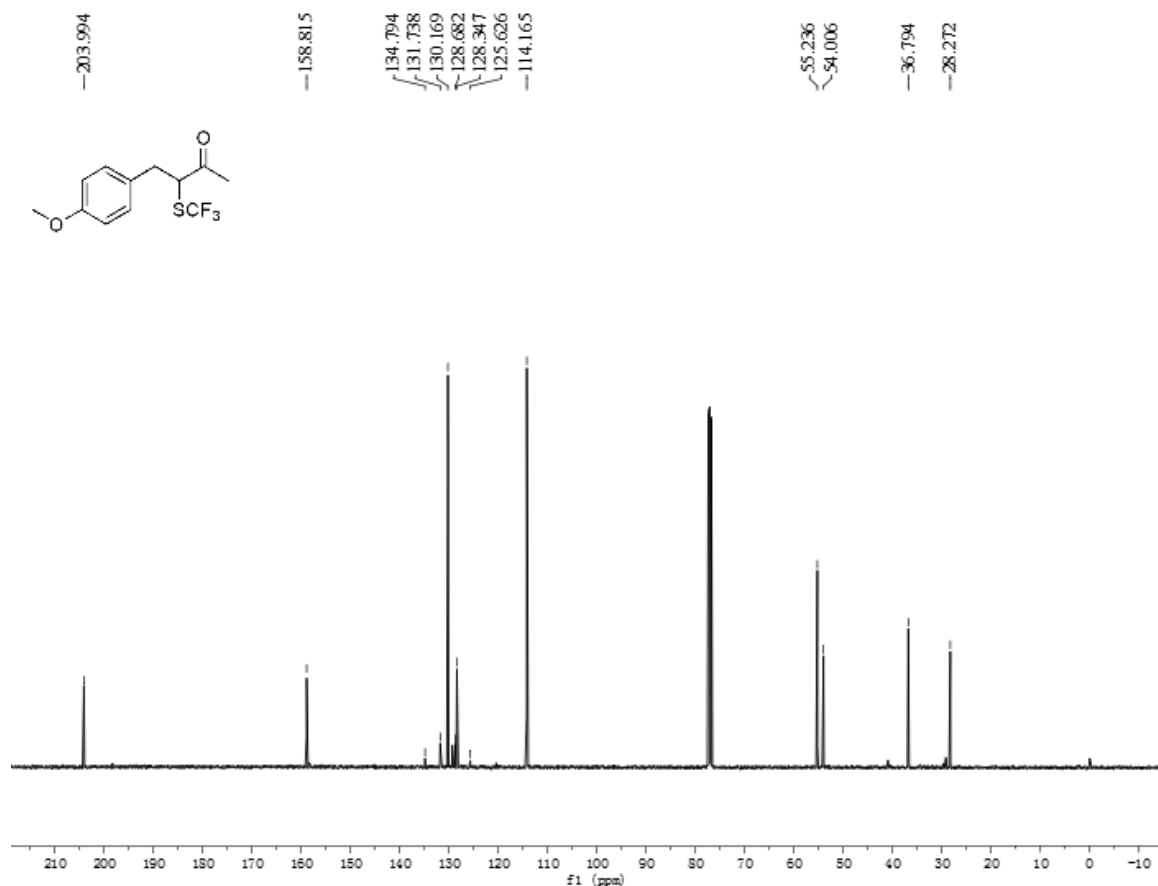

<sup>19</sup>F NMR spectra of **3u**

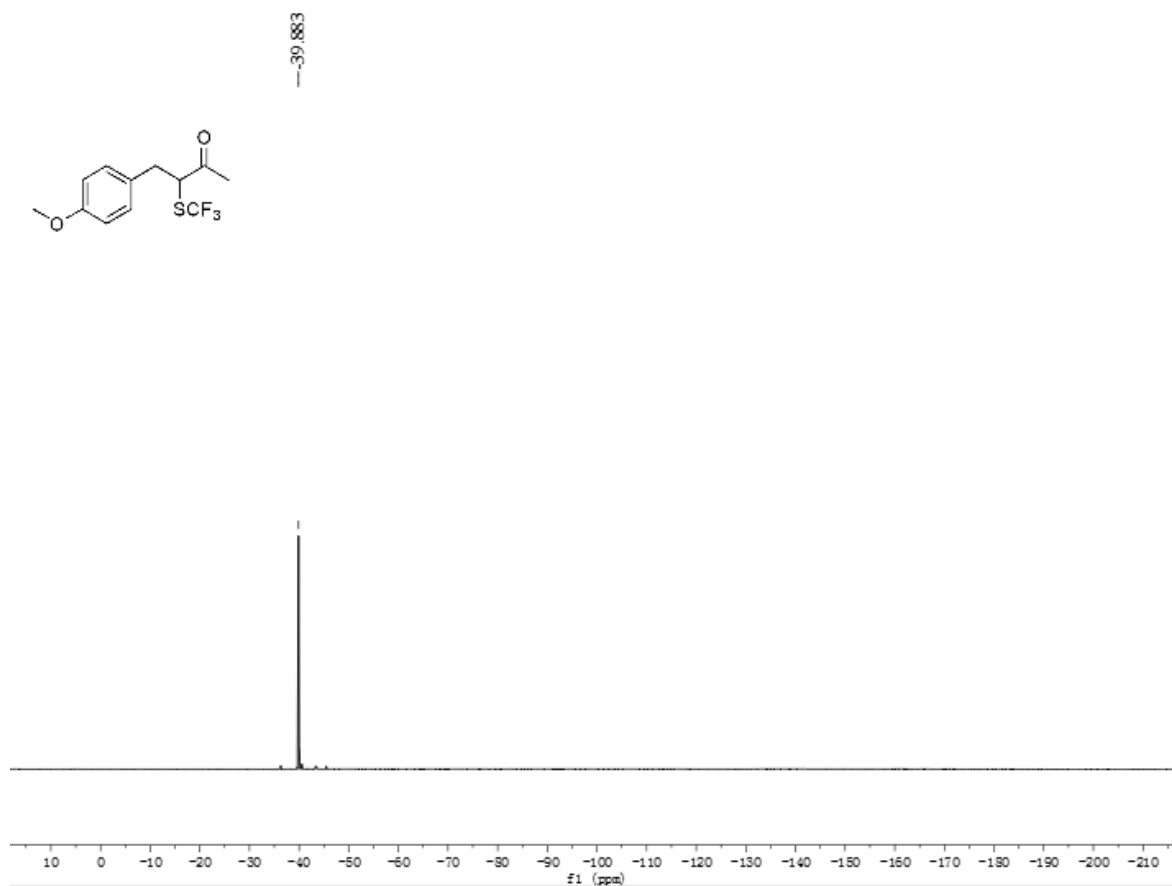

HRMS(EI) spectra of **3u**

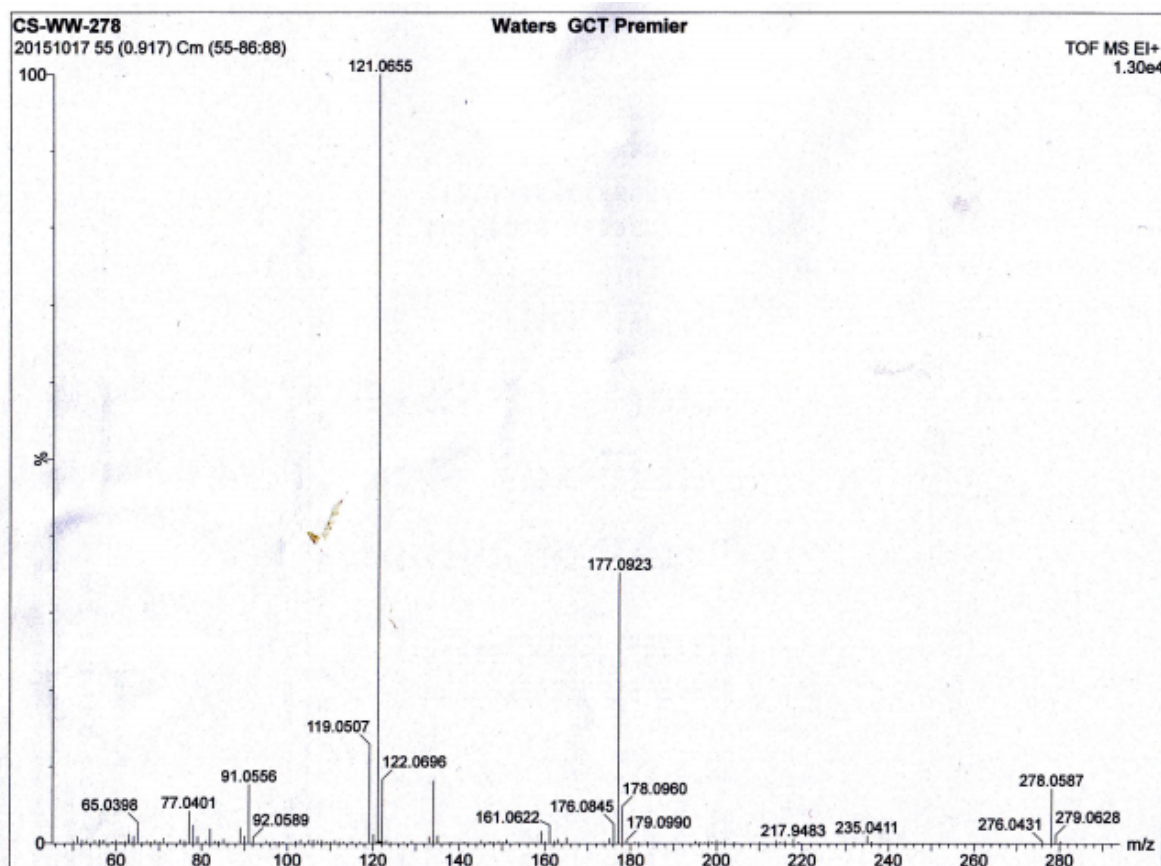

<sup>1</sup>H NMR spectra of **3v**

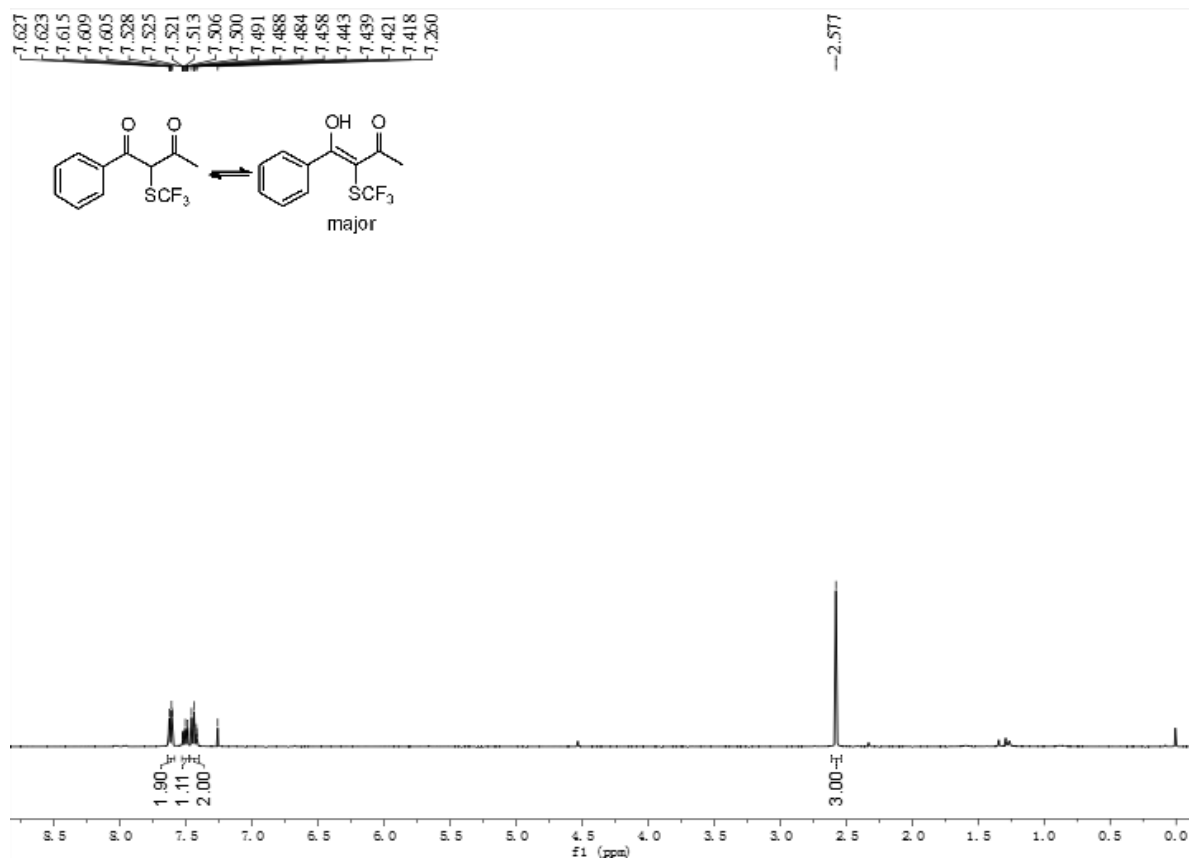

<sup>13</sup>C NMR spectra of **3v**

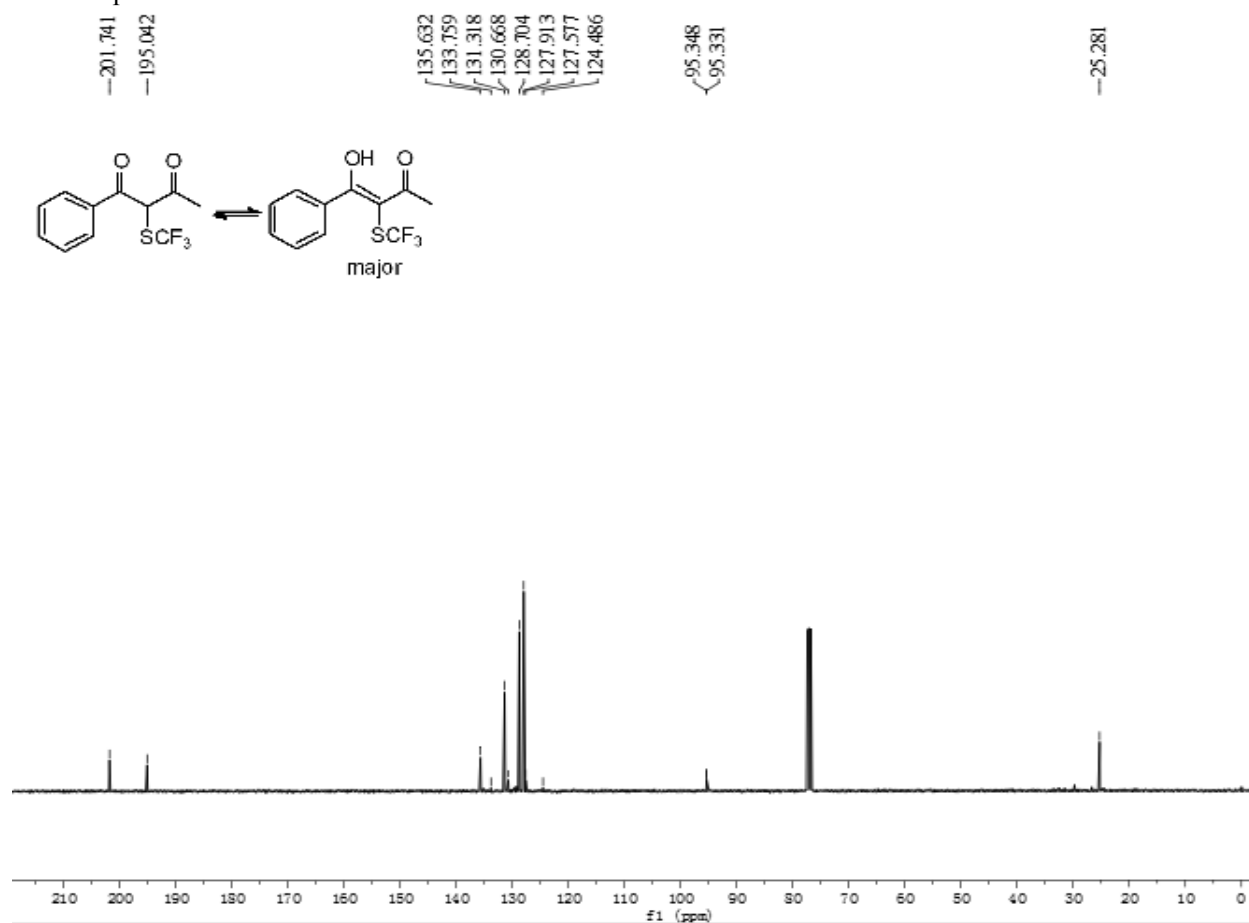



$^{19}\text{F}$  NMR spectra of **3v**

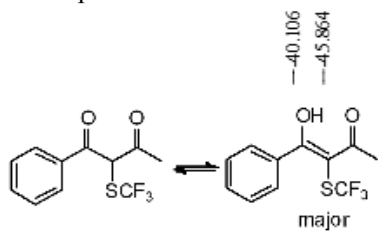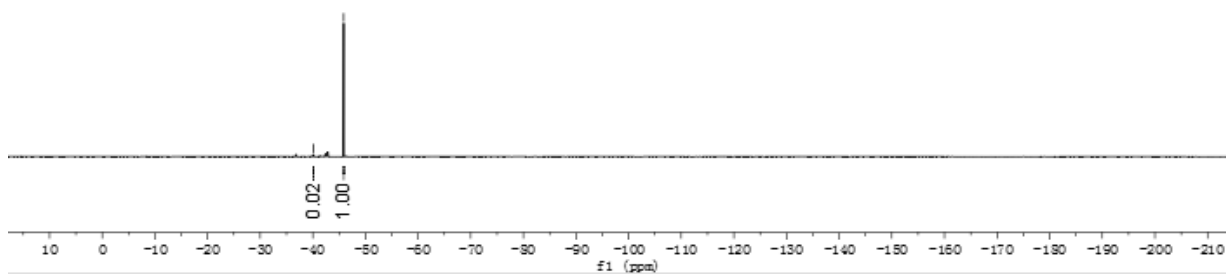

HRMS(EI) spectra of **3v**

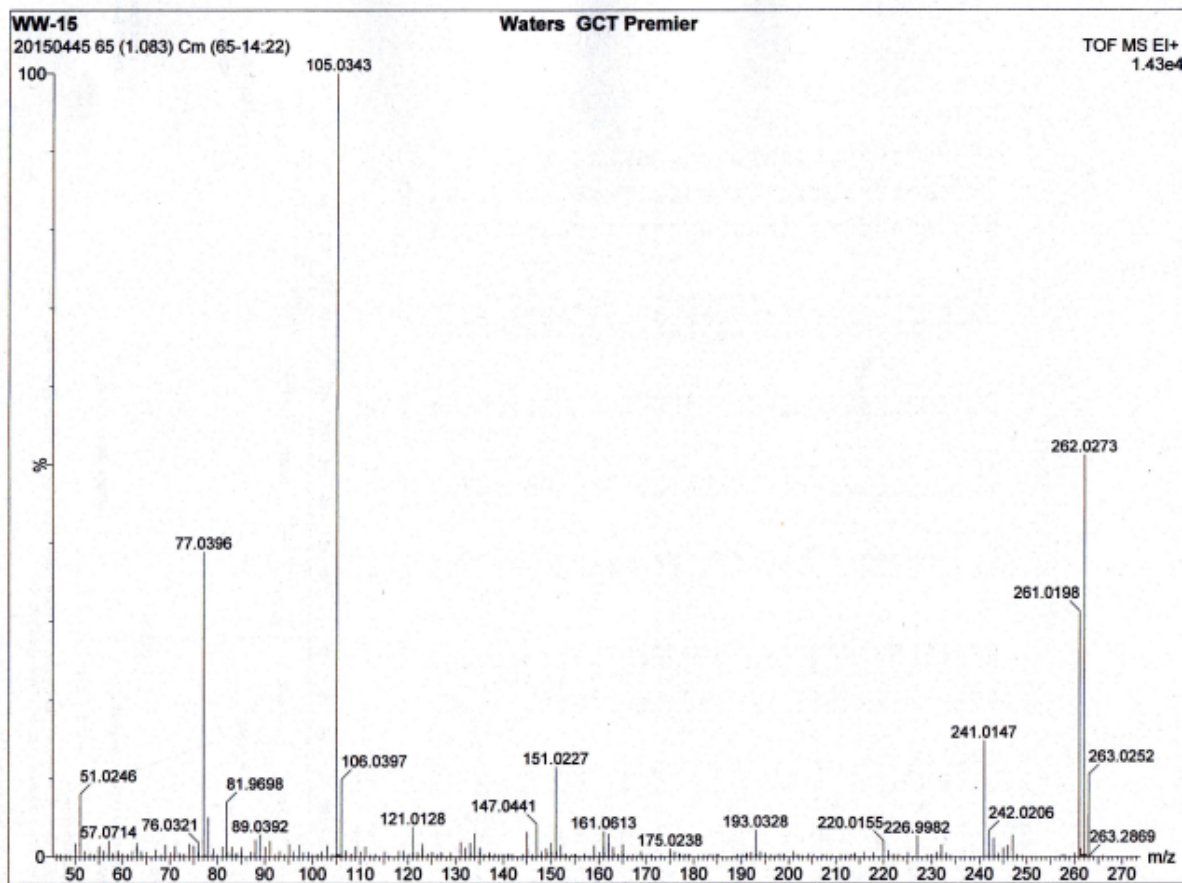

<sup>1</sup>H NMR spectra of **3w** and **3w'**

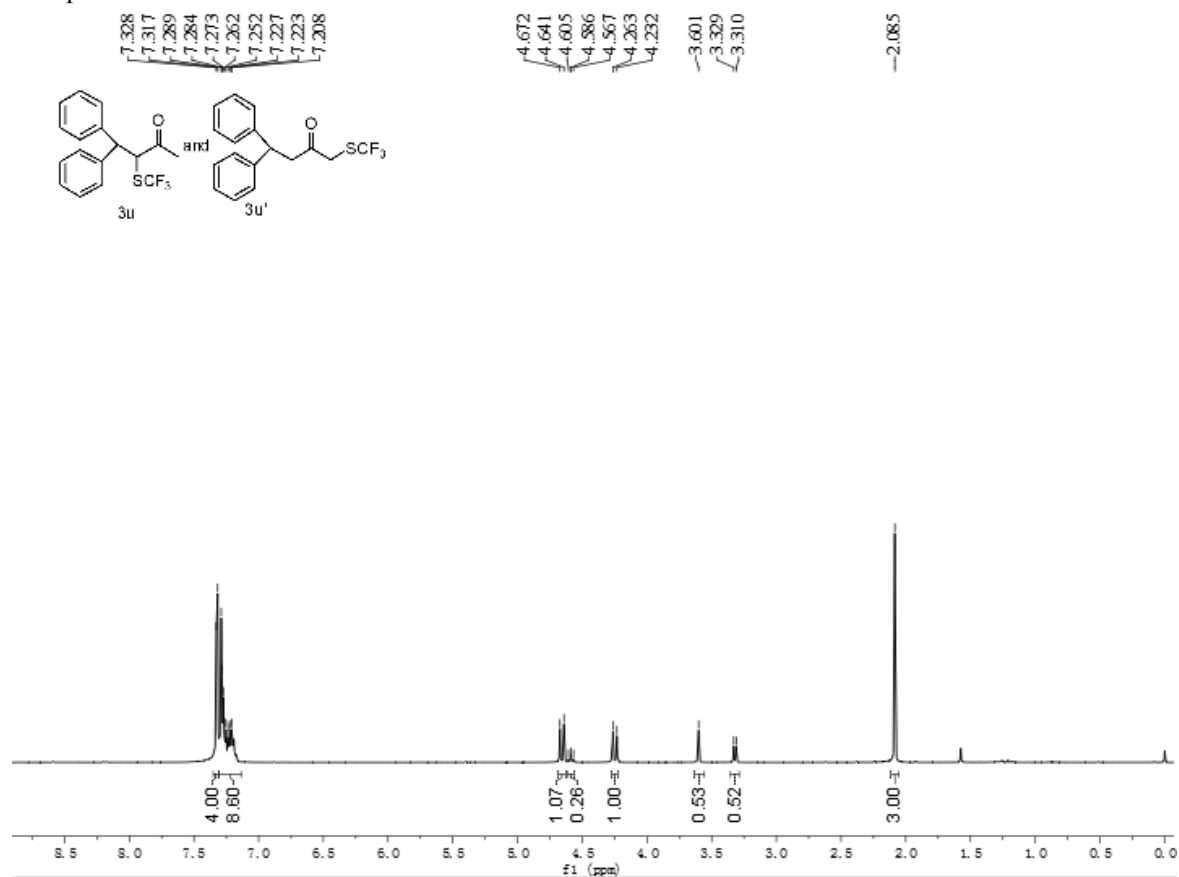

<sup>13</sup>C NMR spectra of **3w** and **3w'**

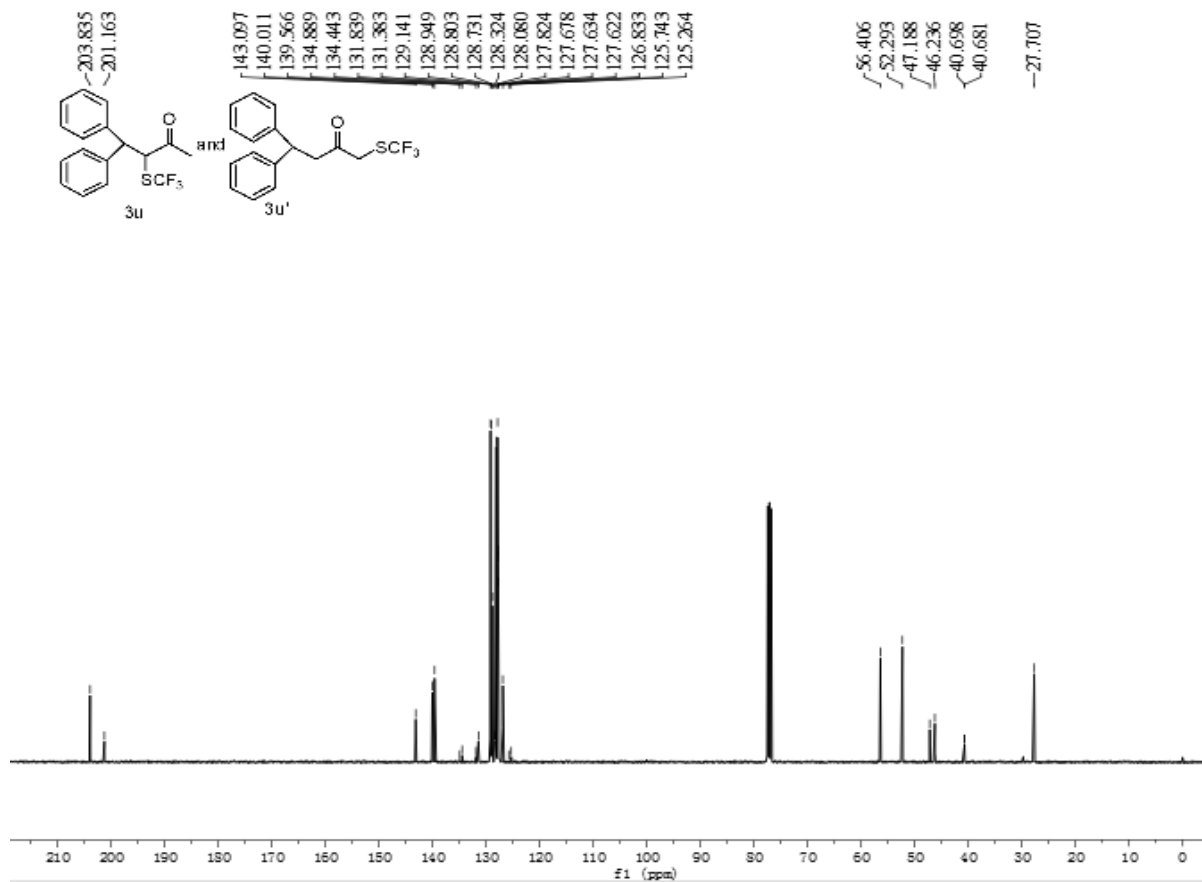

<sup>19</sup>F NMR spectra of **3w** and **3w'**

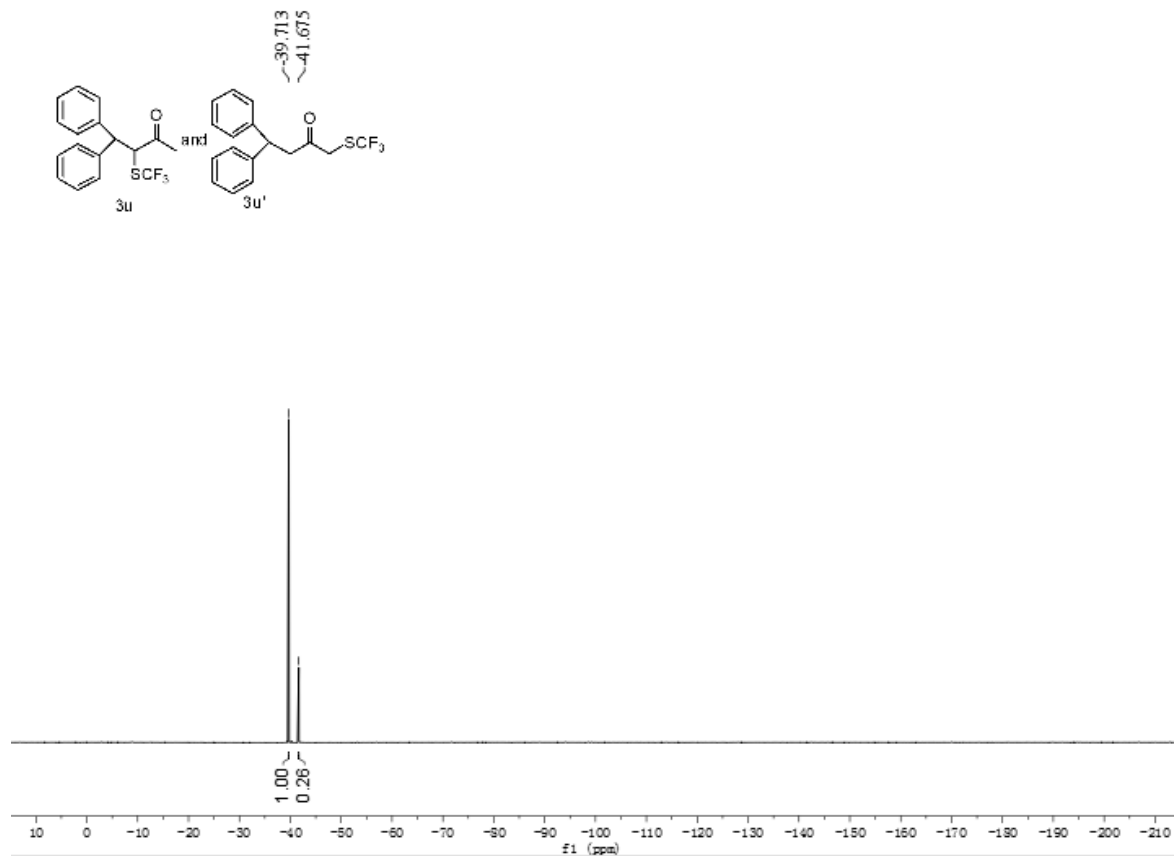

HRMS(EI) spectra of **3w** and **3w'**

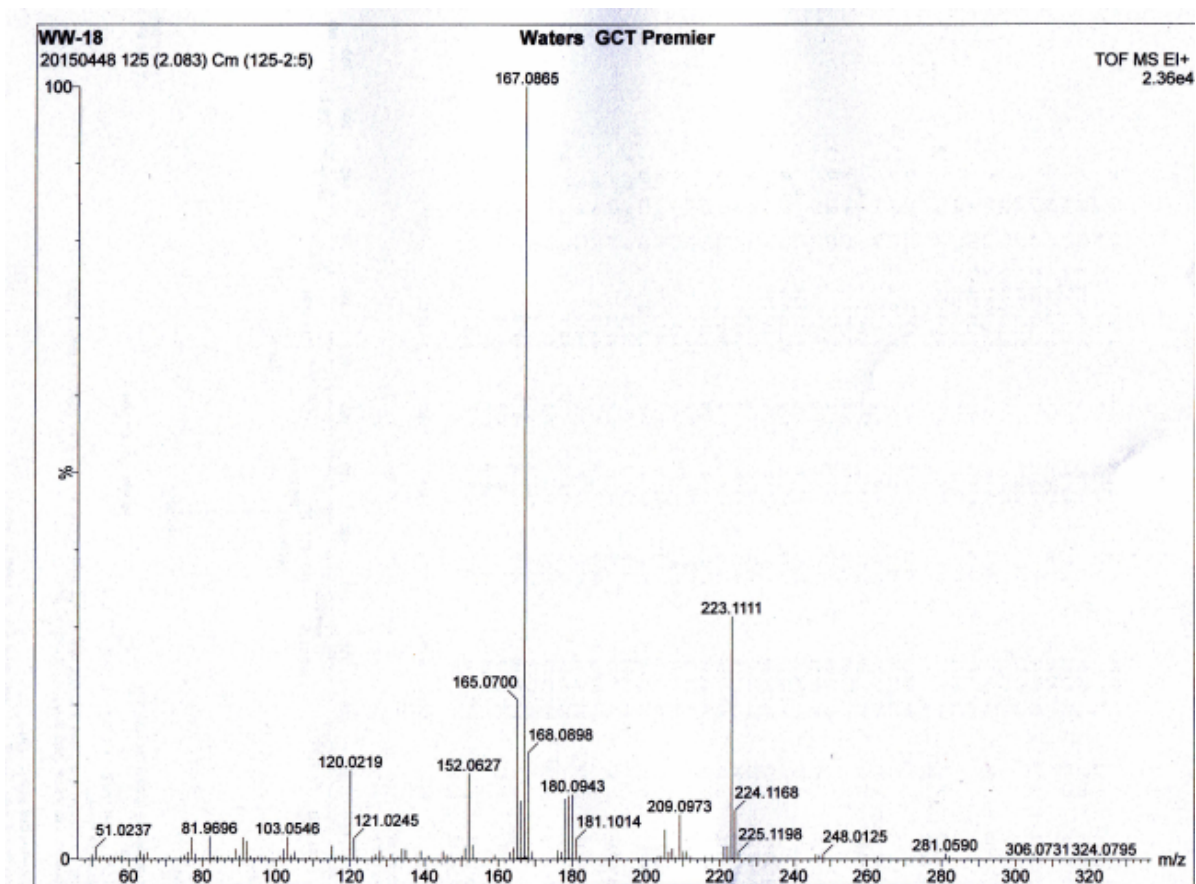

<sup>1</sup>H NMR spectra of **3x**

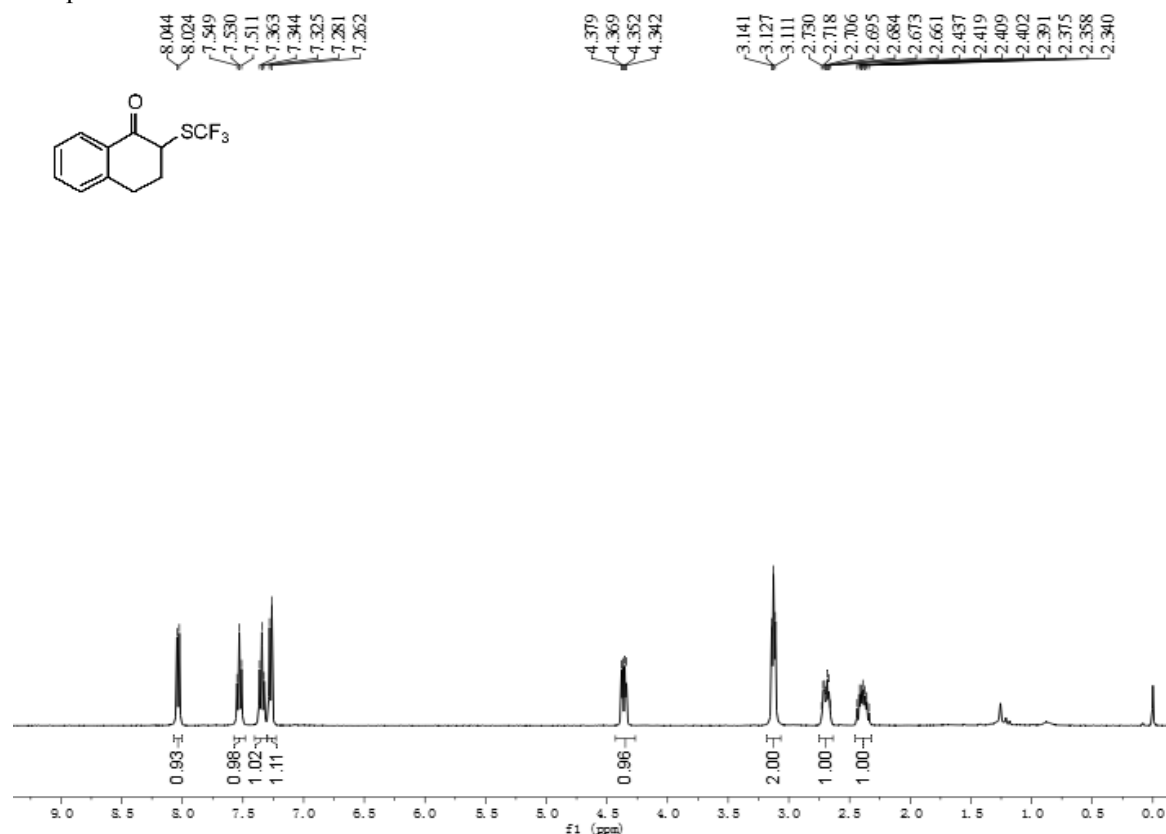

<sup>13</sup>C NMR spectra of **3x**

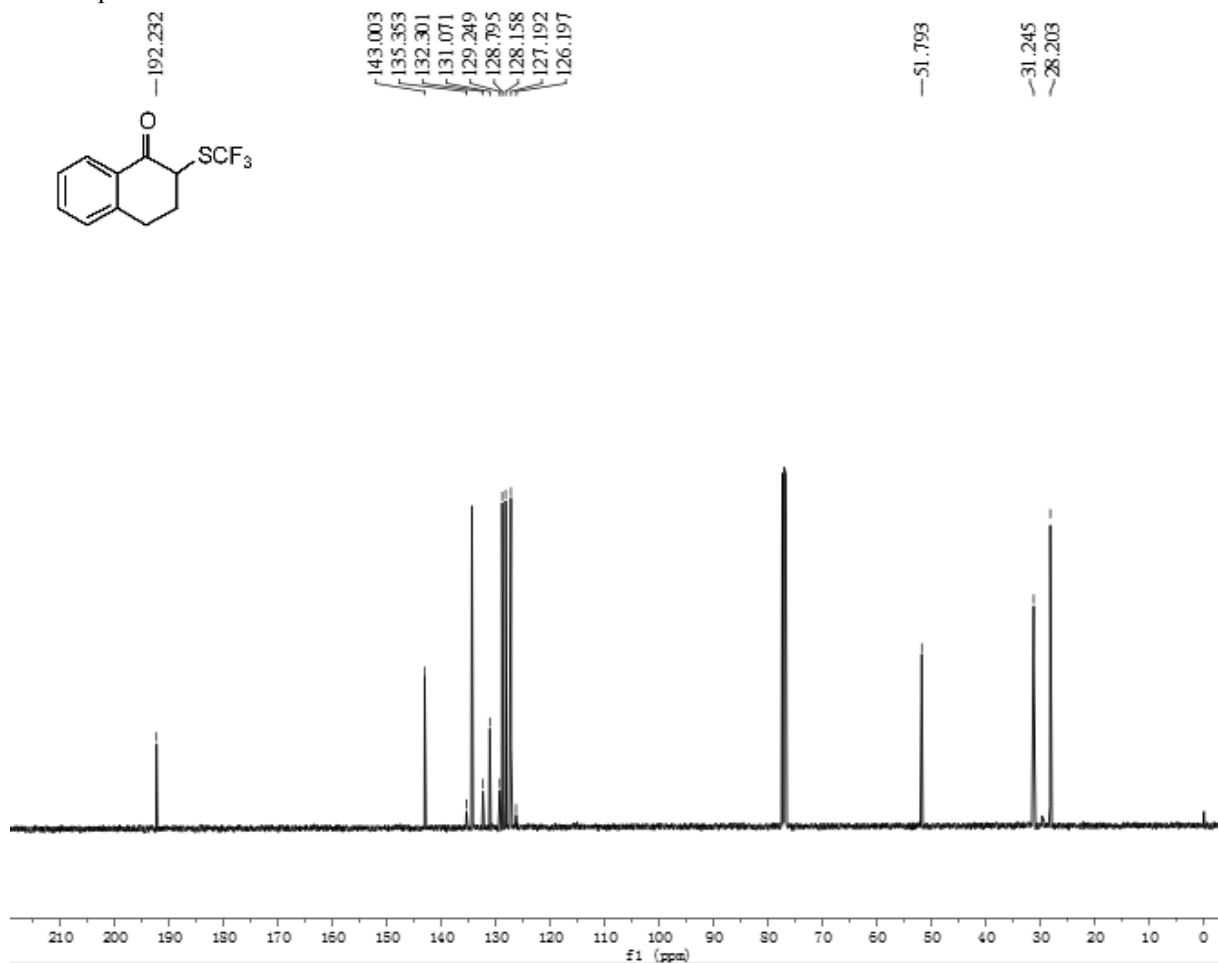

$^{19}\text{F}$  NMR spectra of **3x**

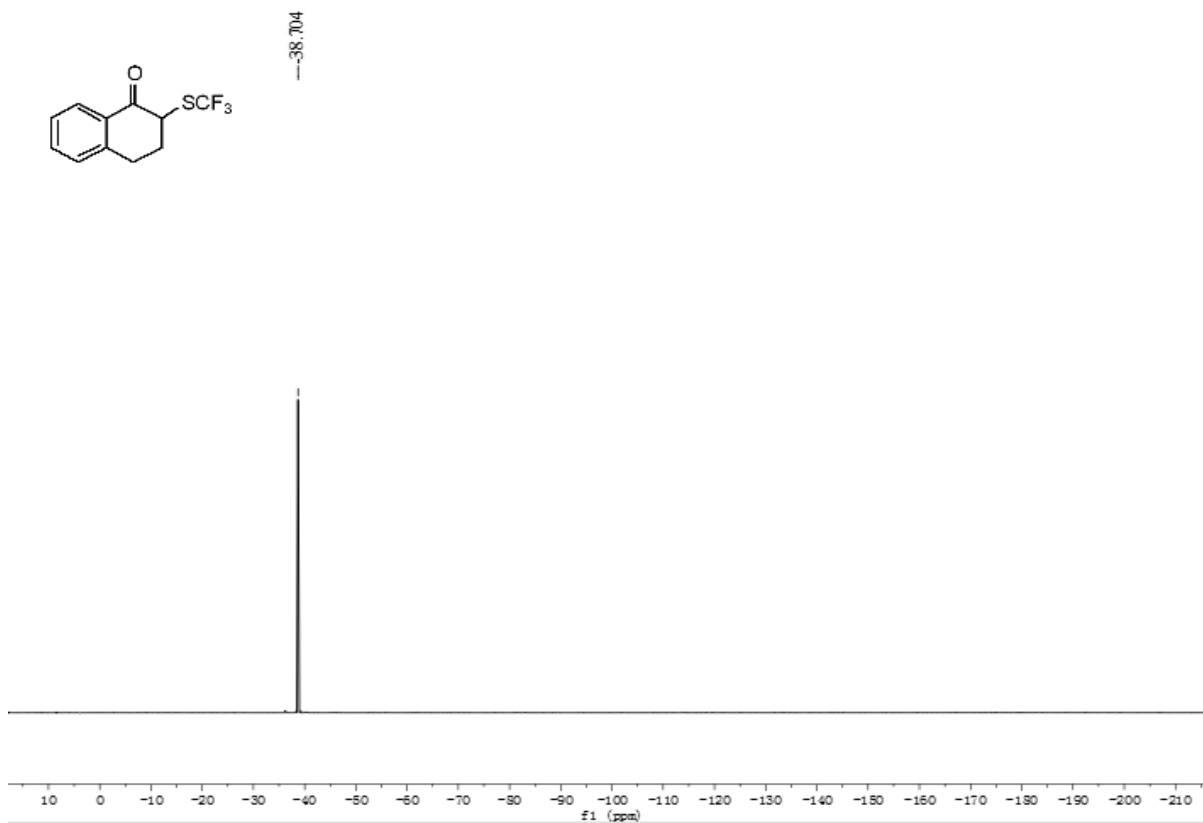

HRMS(EI) spectra of **3x**

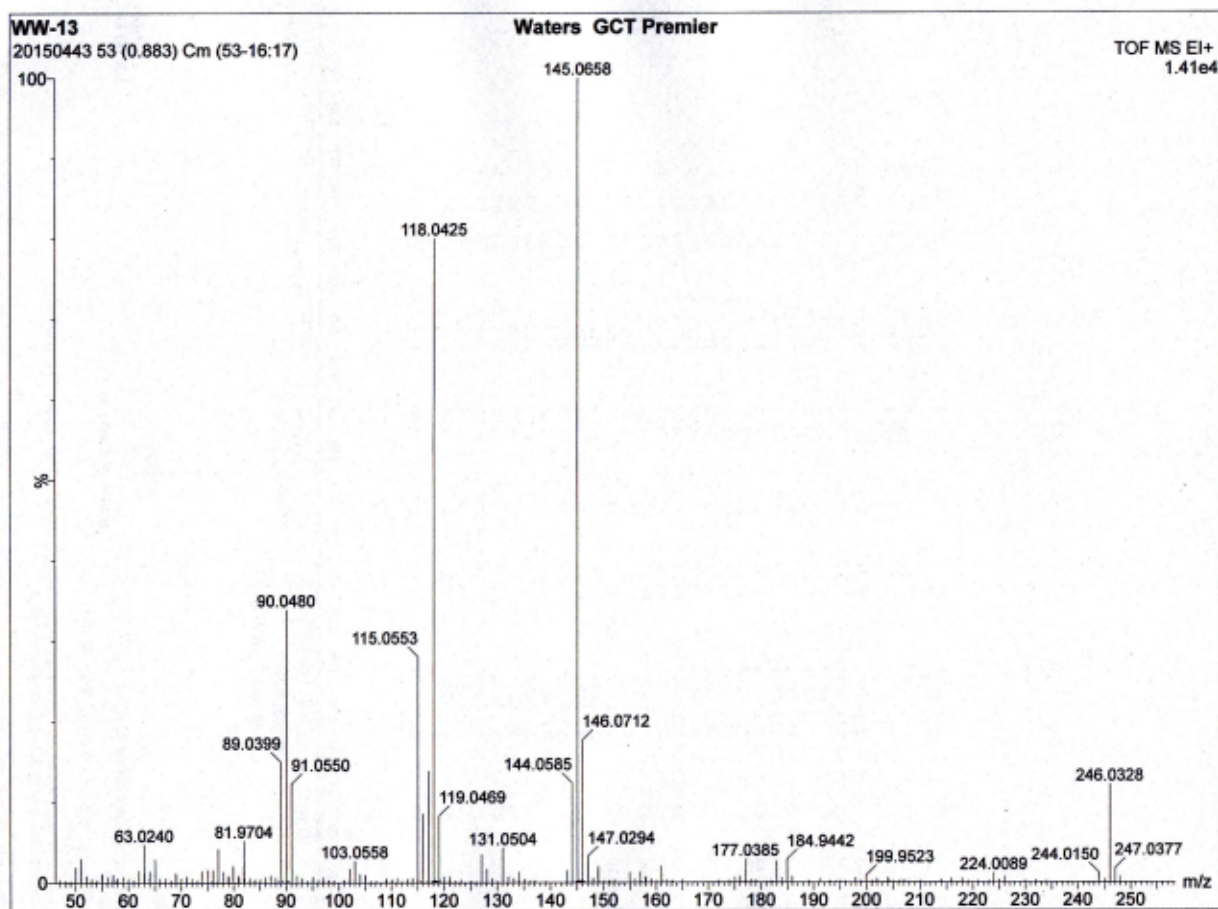

<sup>1</sup>H NMR spectra of **3y**

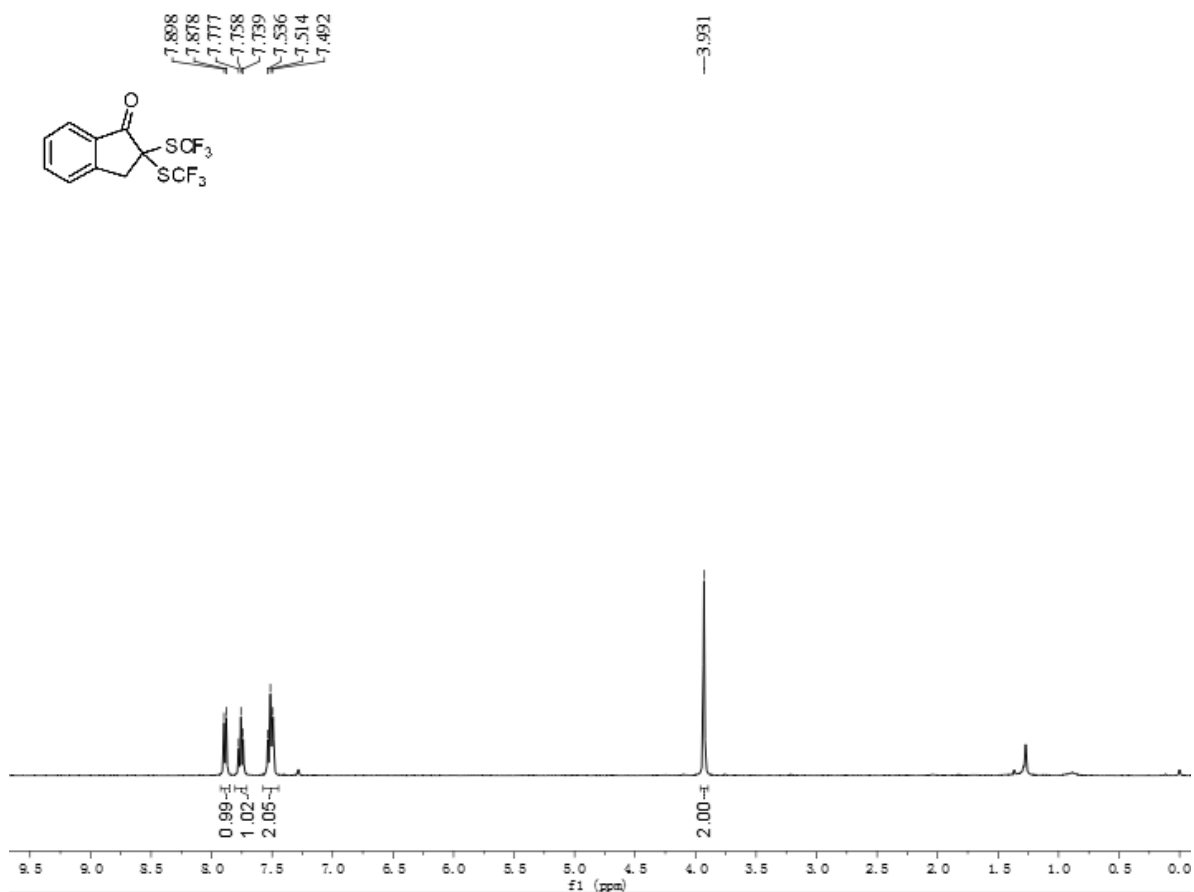

<sup>13</sup>C NMR spectra of **3y**

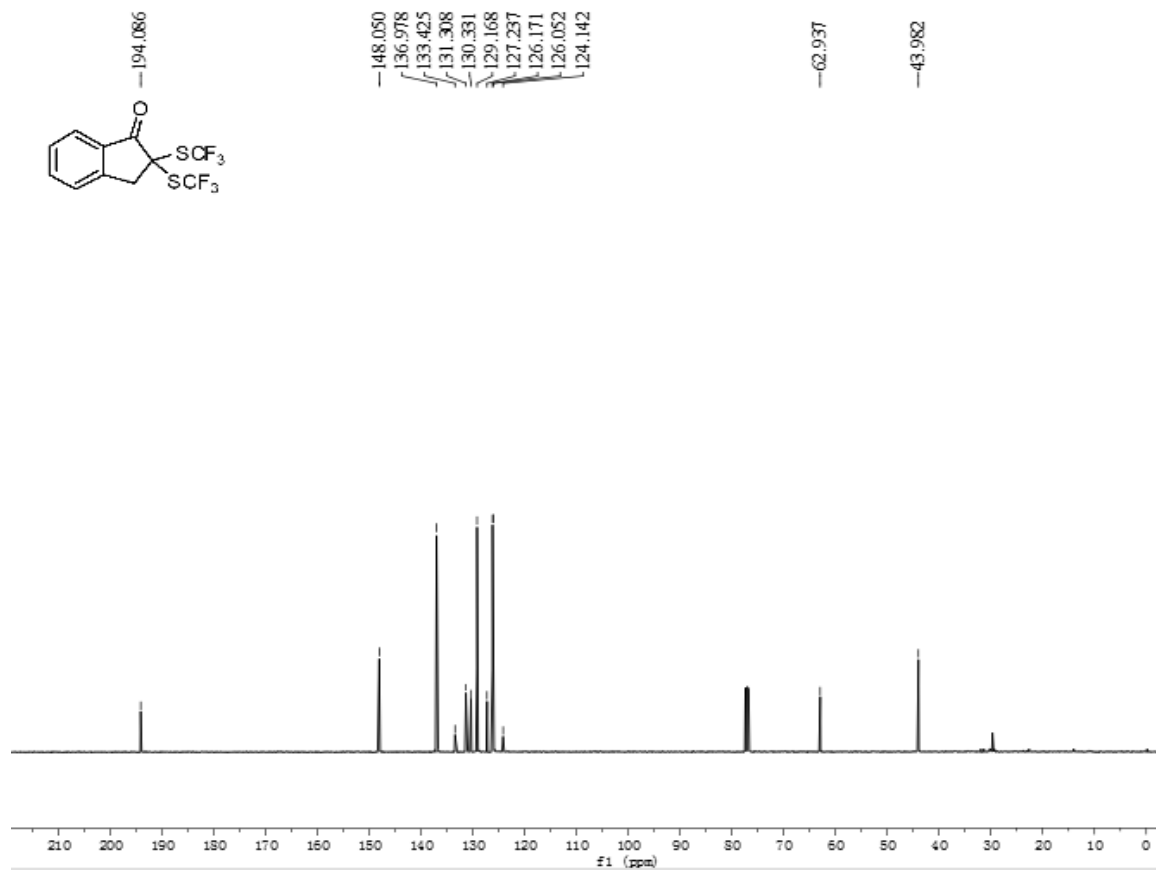

<sup>19</sup>F NMR spectra of **3y**

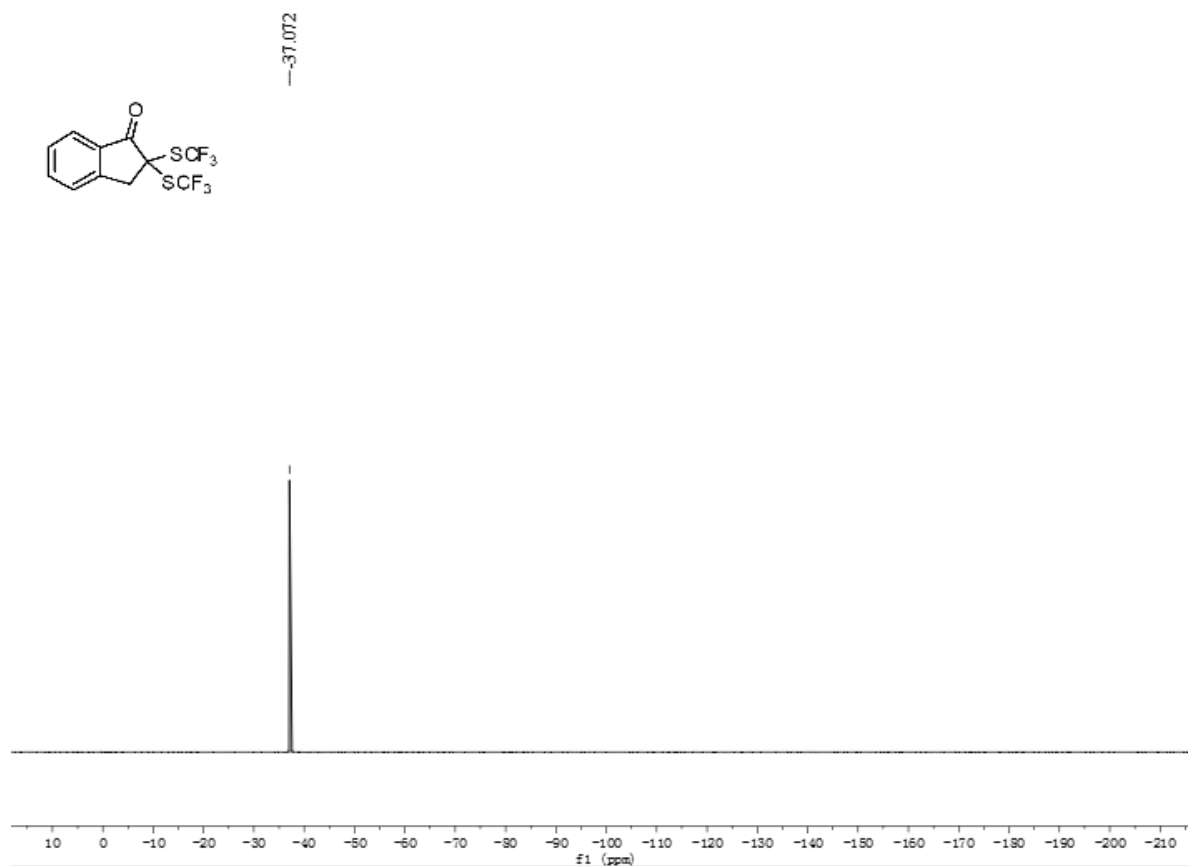

HRMS(EI) spectra of **3y**

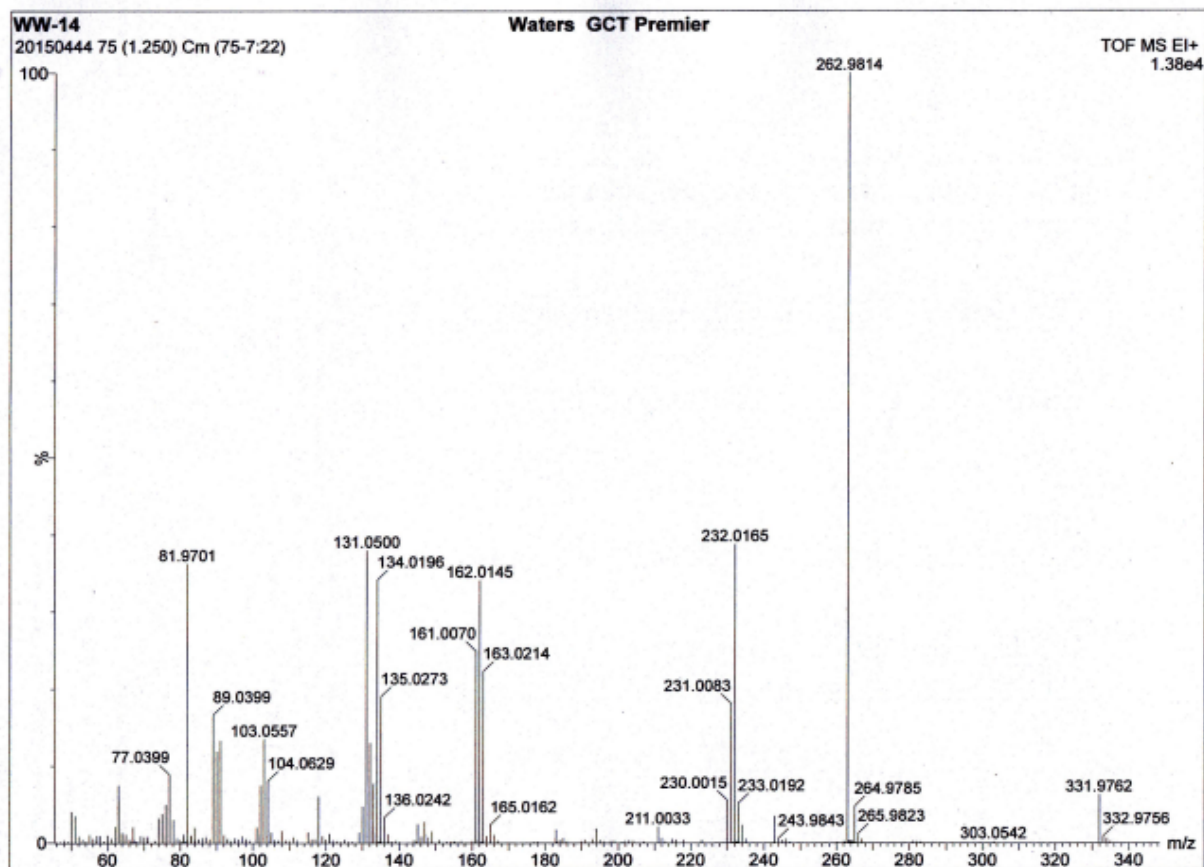

<sup>1</sup>H NMR spectra of **3z**

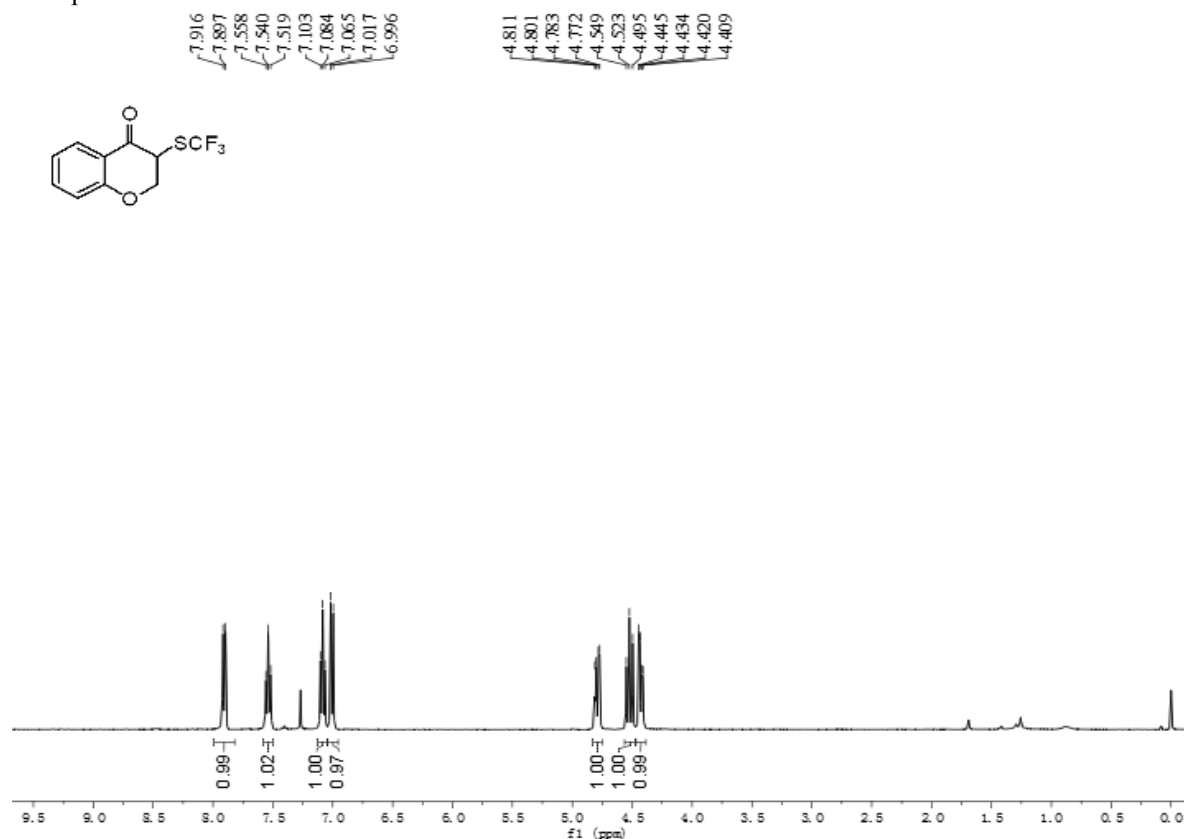

<sup>13</sup>C NMR spectra of **3z**

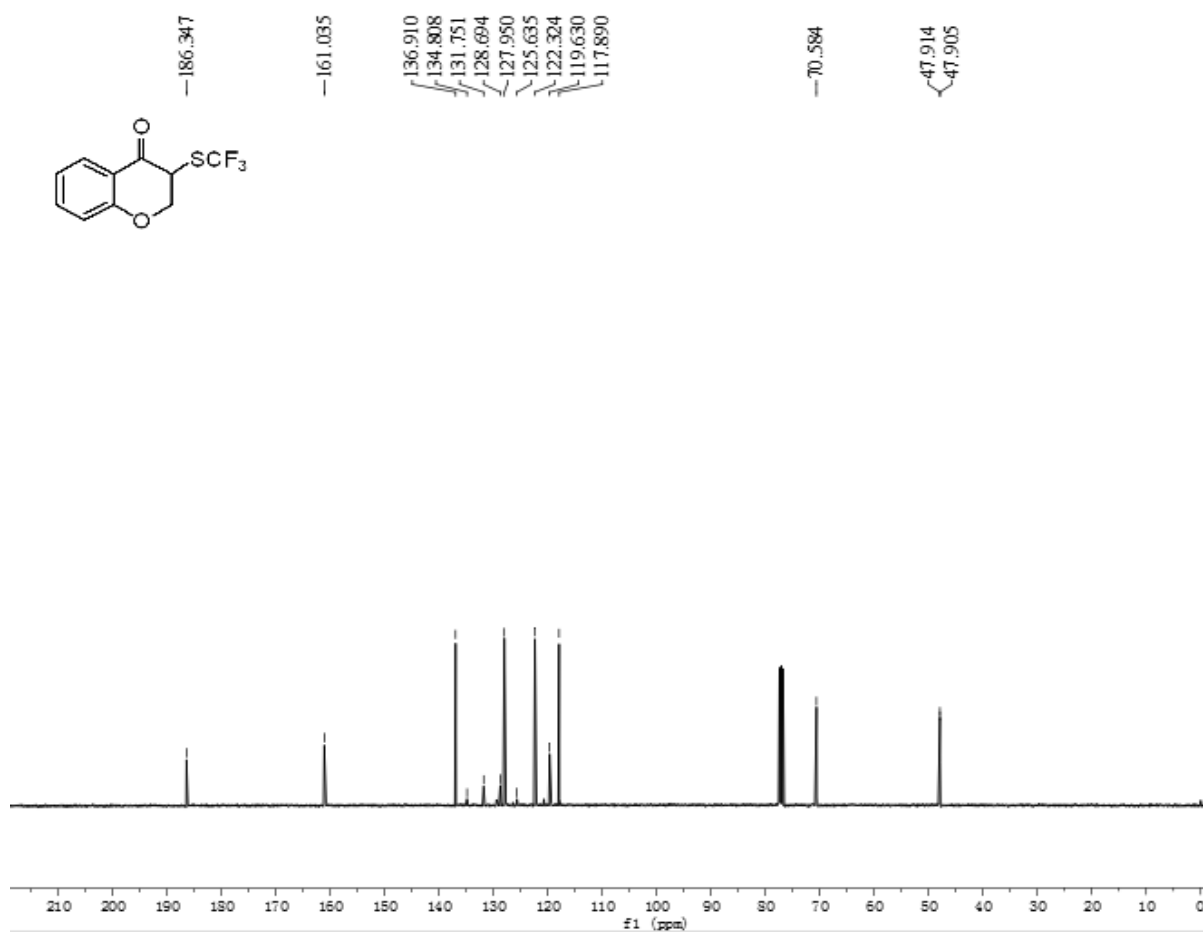



<sup>19</sup>F NMR spectra of **3z**

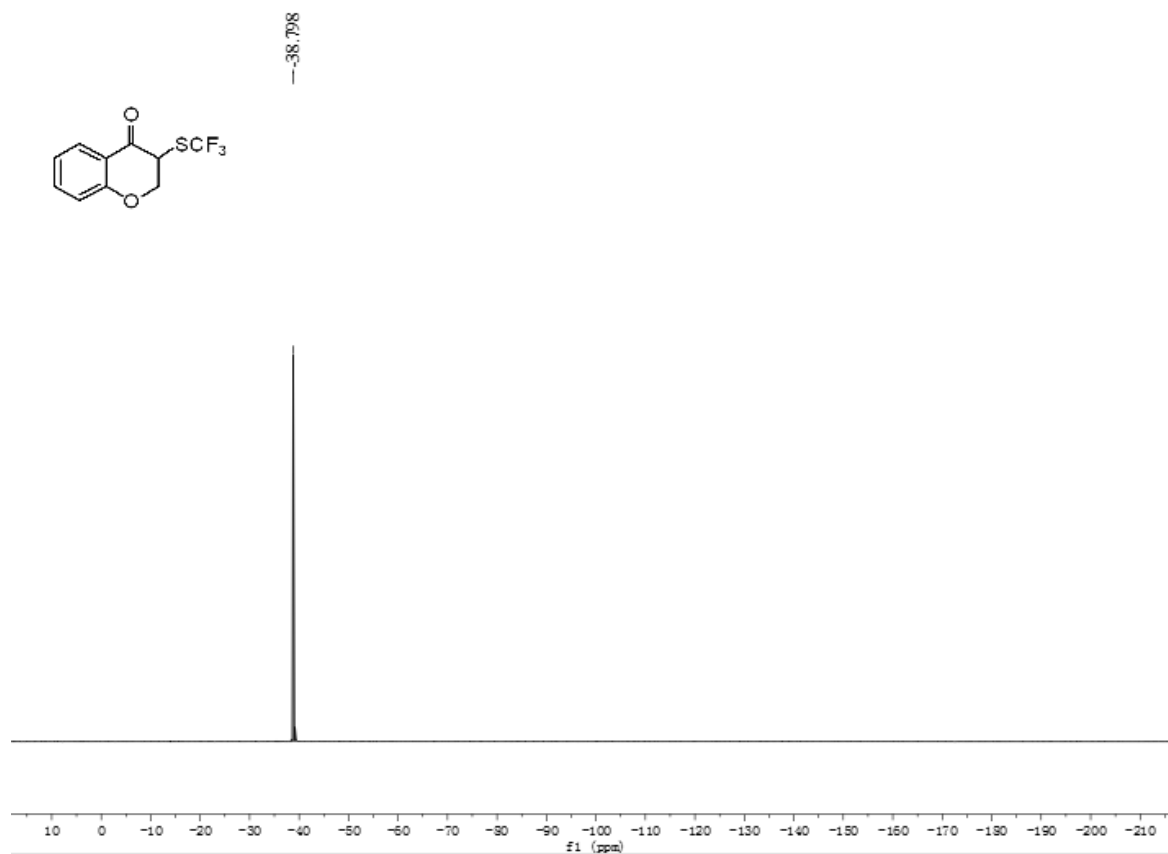

HRMS(EI) spectra of **3z**

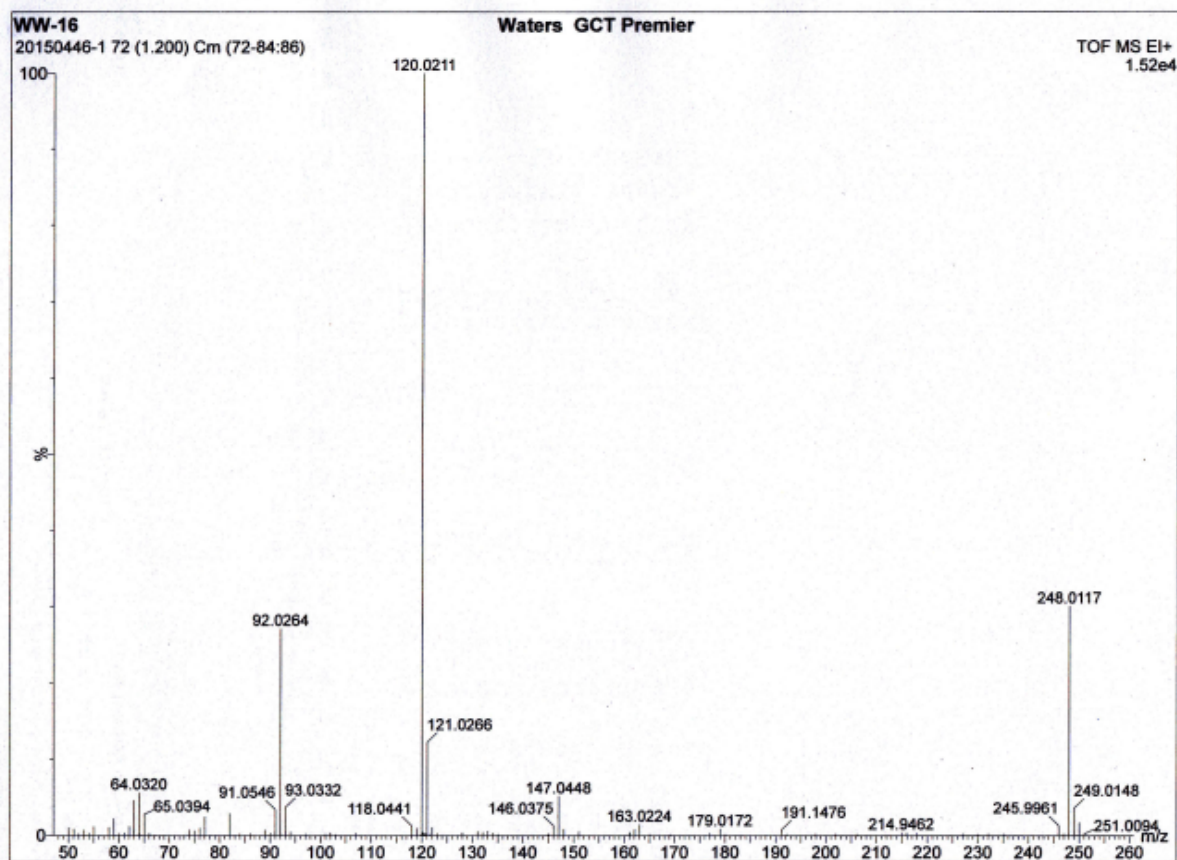

<sup>1</sup>H NMR spectra of **3z'**

7.990  
7.986  
7.970  
7.966  
7.615  
7.611  
7.608  
7.594  
7.590  
7.192  
7.190  
7.172  
7.154  
7.152  
7.059  
7.058  
7.058  
7.037

4.785

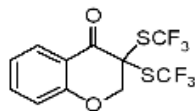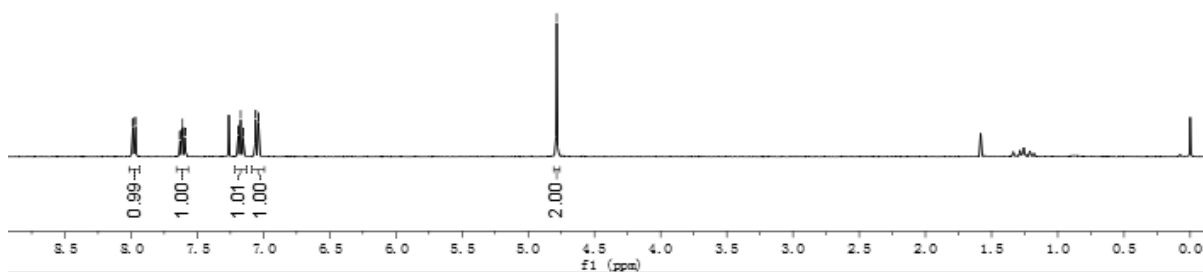

<sup>13</sup>C NMR spectra of **3z'**

182.944

159.383

137.403

133.382

130.290

128.982

127.198

124.105

123.235

117.765

117.447

73.433

64.148

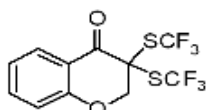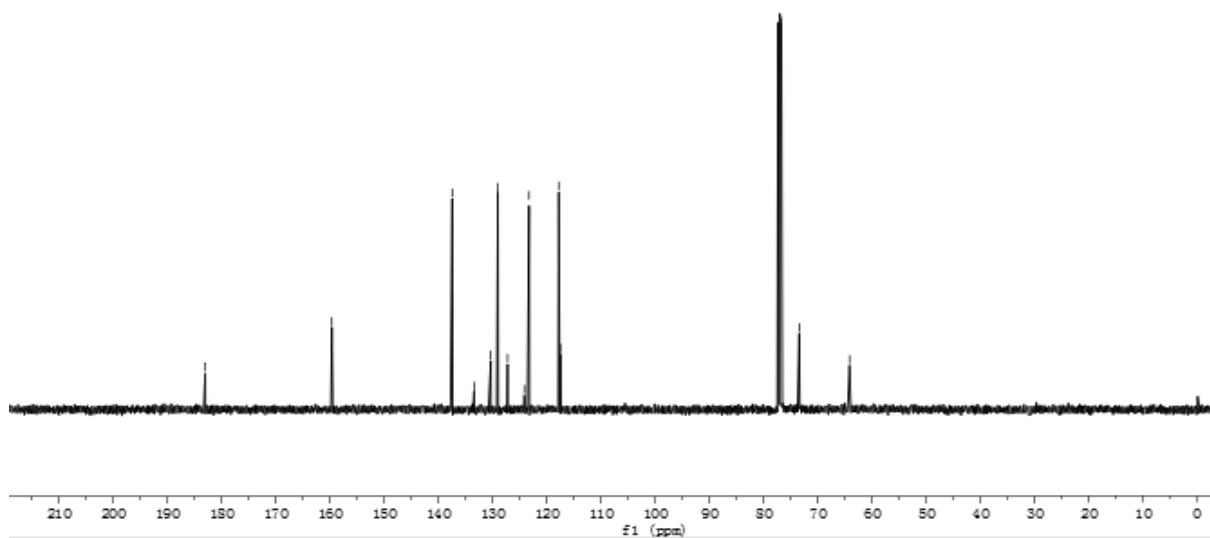

$^{19}\text{F}$  NMR spectra of **3z'**

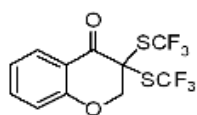

-35.417

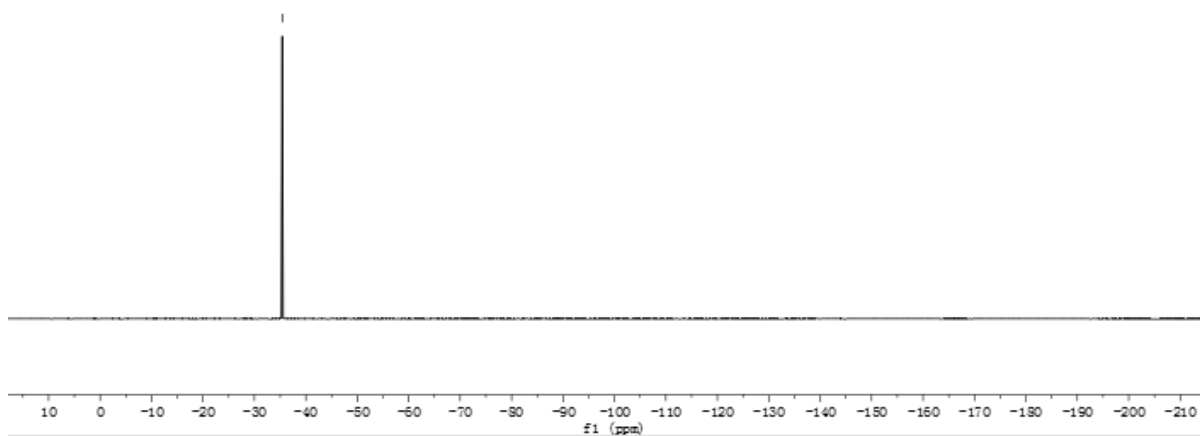

HRMS(EI) spectra of **3z'**

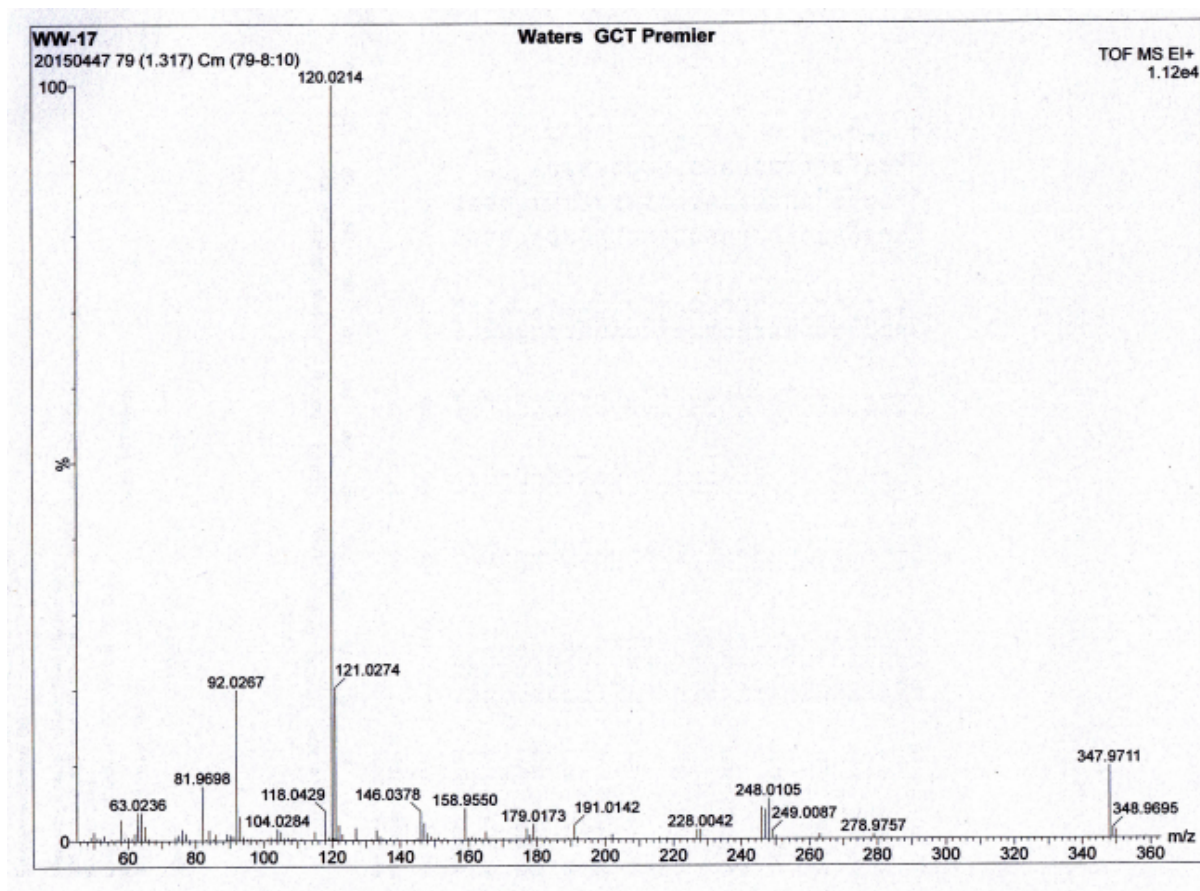

<sup>1</sup>H NMR spectra of **3d'**

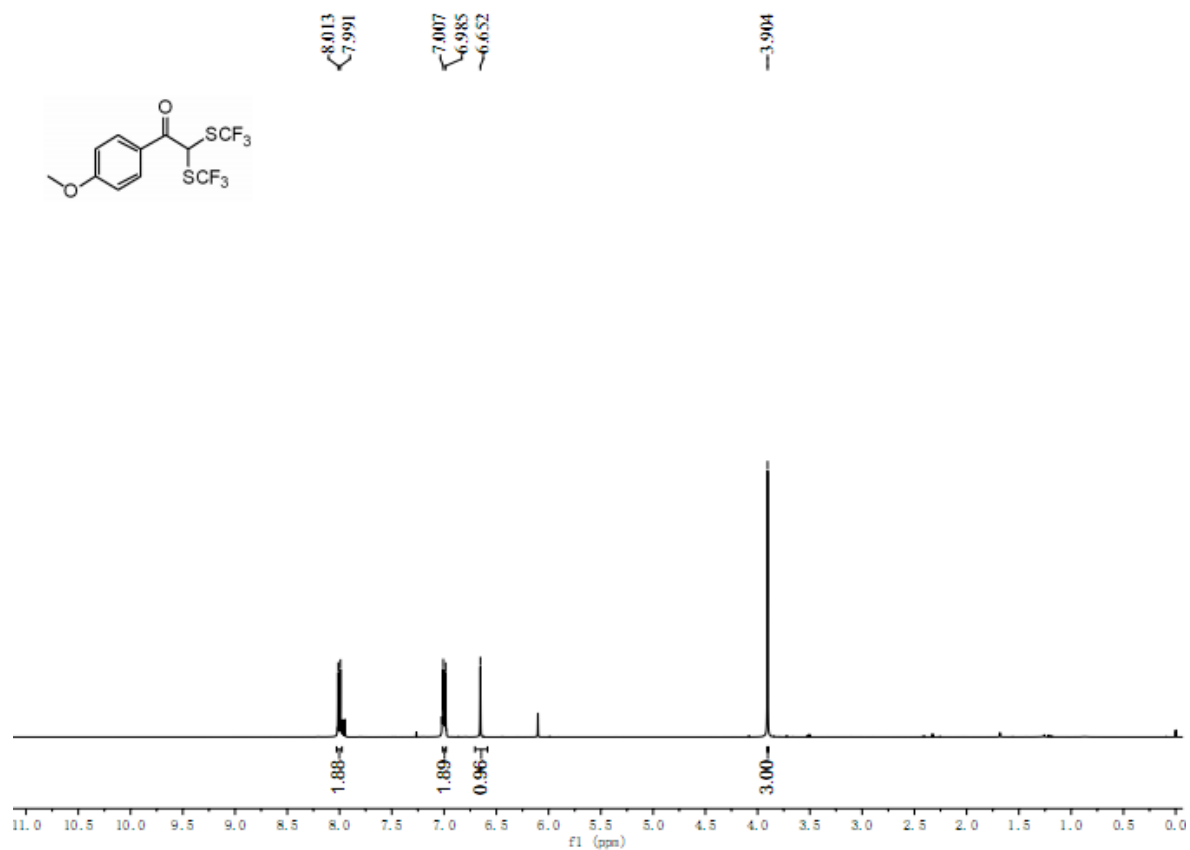

<sup>13</sup>C NMR spectra of **3d'**

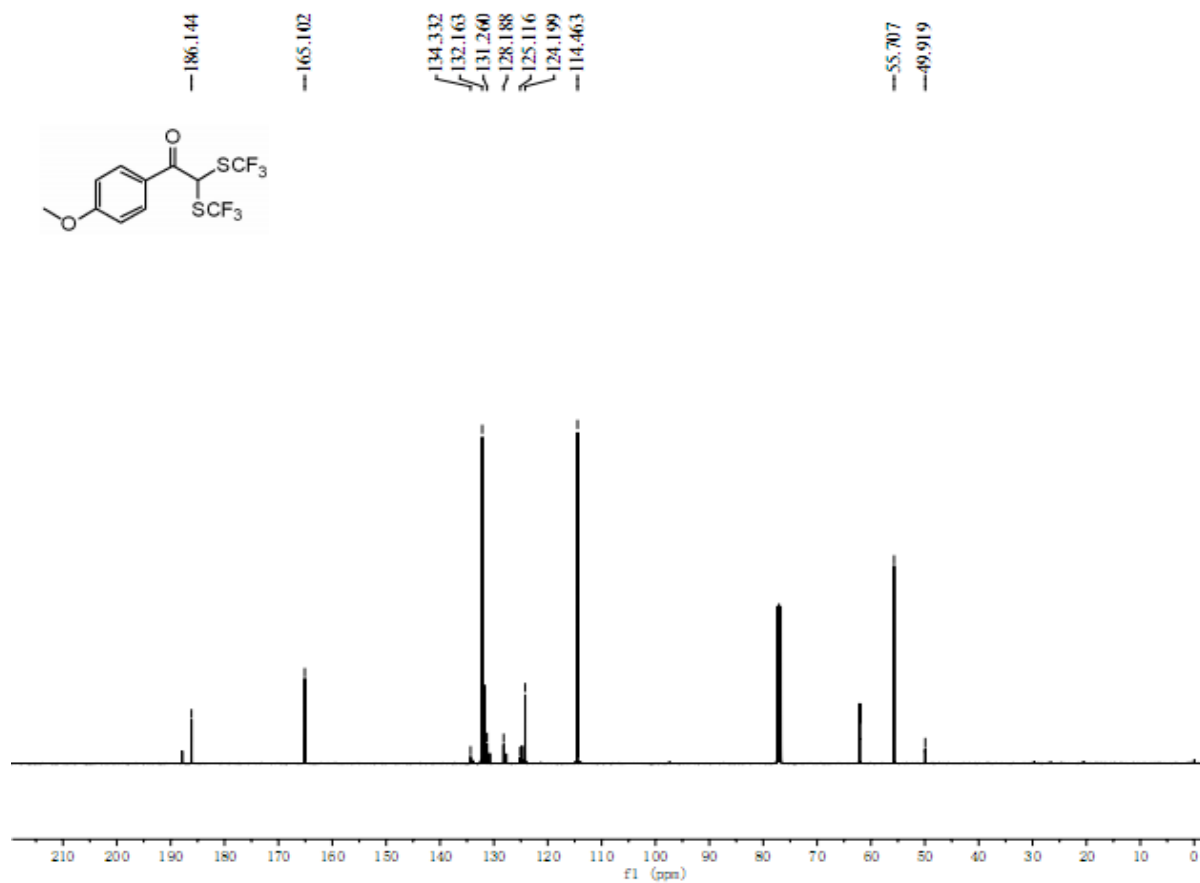

$^{19}\text{F}$  NMR spectra of **3d'**

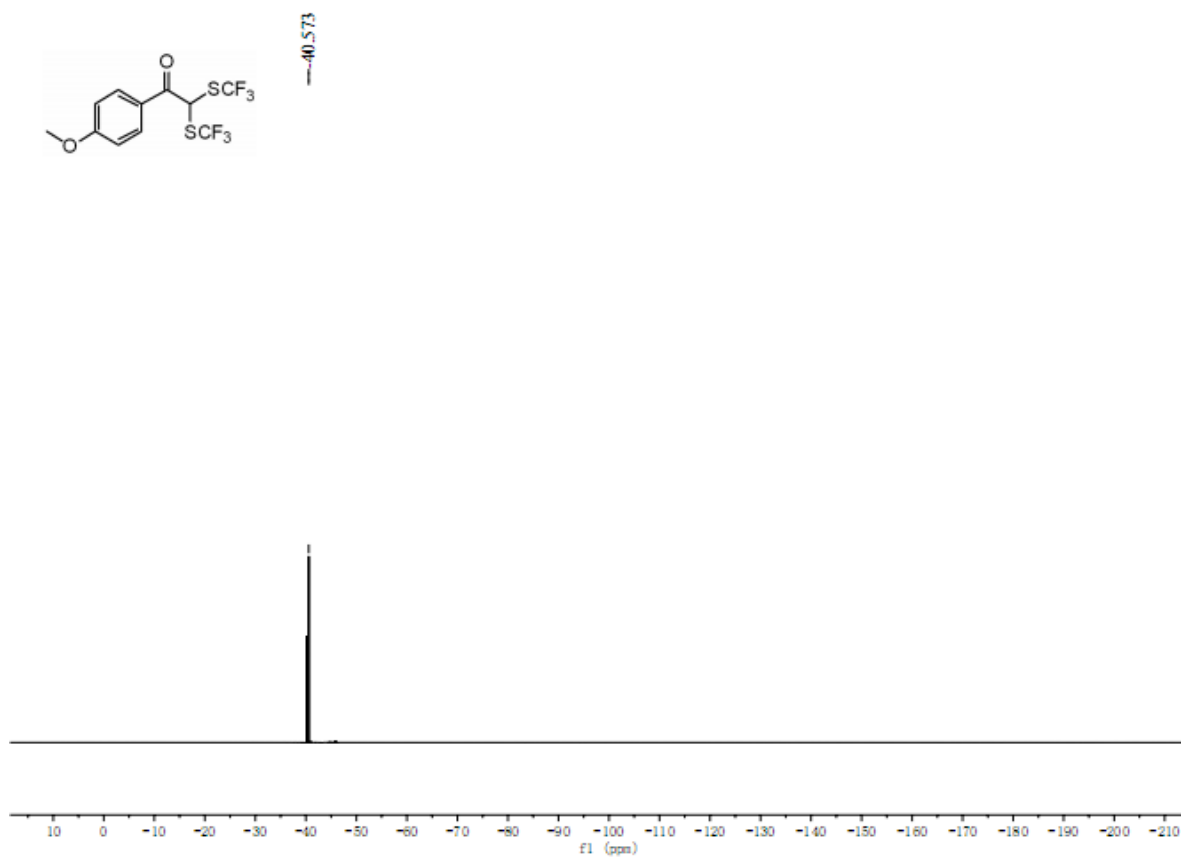

HRMS(EI) spectra of **3d'**

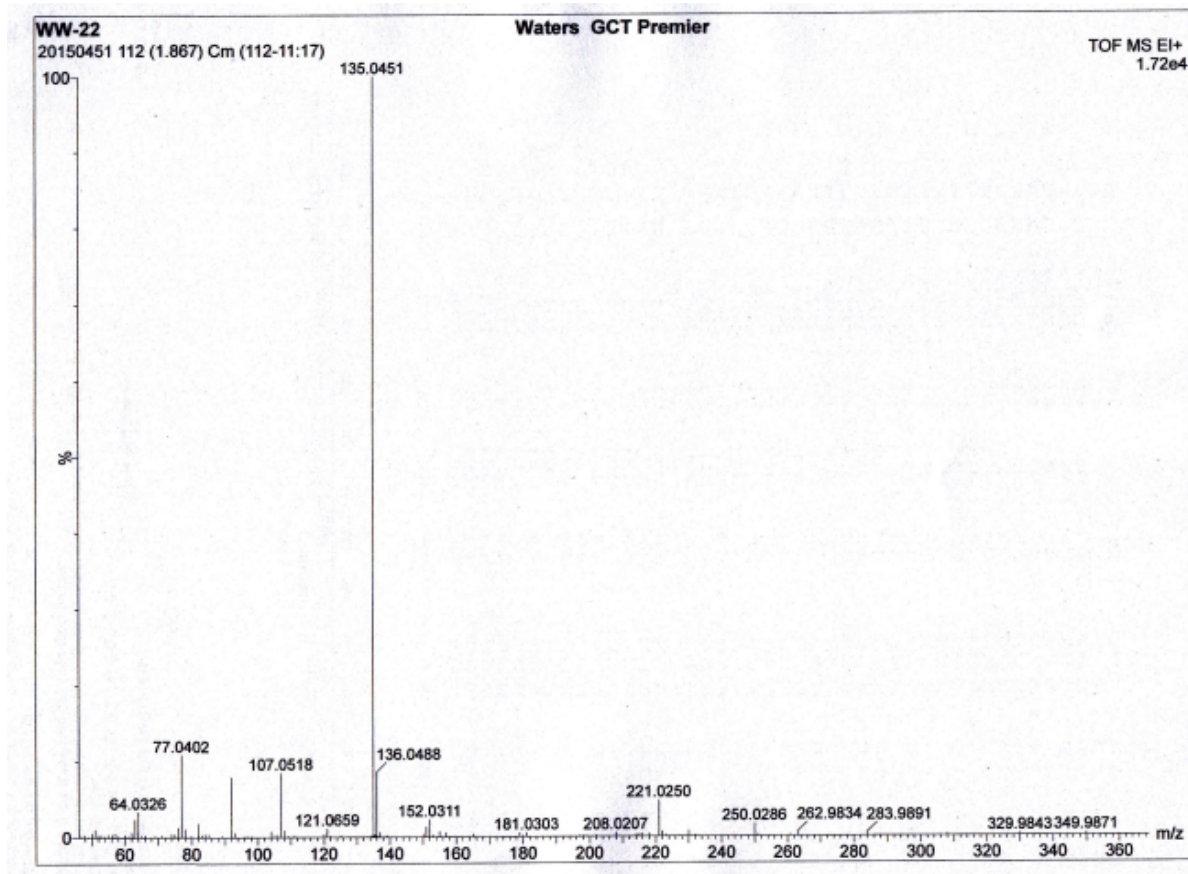

<sup>1</sup>H NMR spectra of **3h'**

8.153  
8.148  
8.144  
7.958  
7.956  
7.940  
7.938  
7.937  
7.818  
7.800  
7.798  
7.795  
7.452  
7.432  
7.412  
6.990

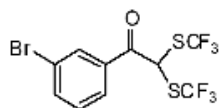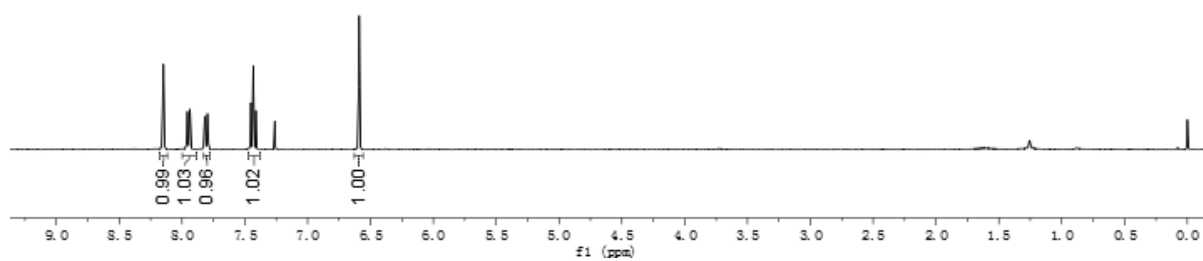

<sup>13</sup>C NMR spectra of **3h'**

186.290

137.863  
134.060  
133.393  
132.461  
130.985  
130.633  
128.016  
127.910  
124.834  
123.475

61.715  
61.693  
61.669  
61.646

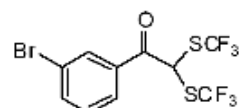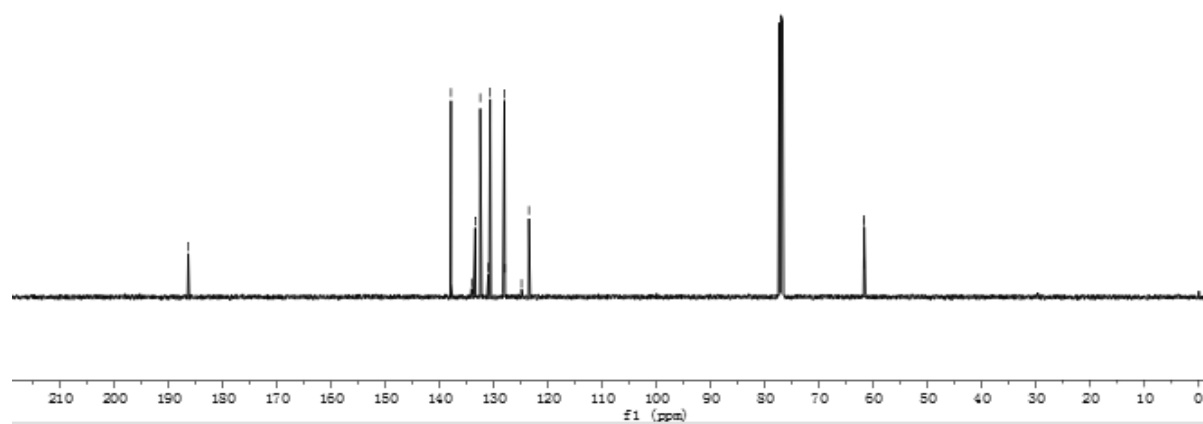

$^{19}\text{F}$  NMR spectra of **3h'**

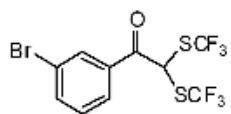

-40.405

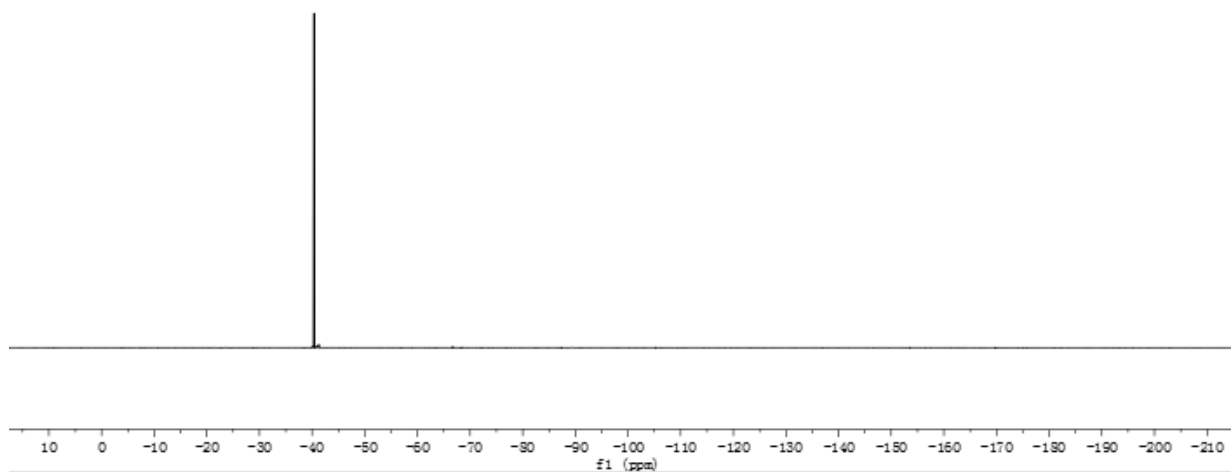

HRMS(EI) spectra of **3h'**

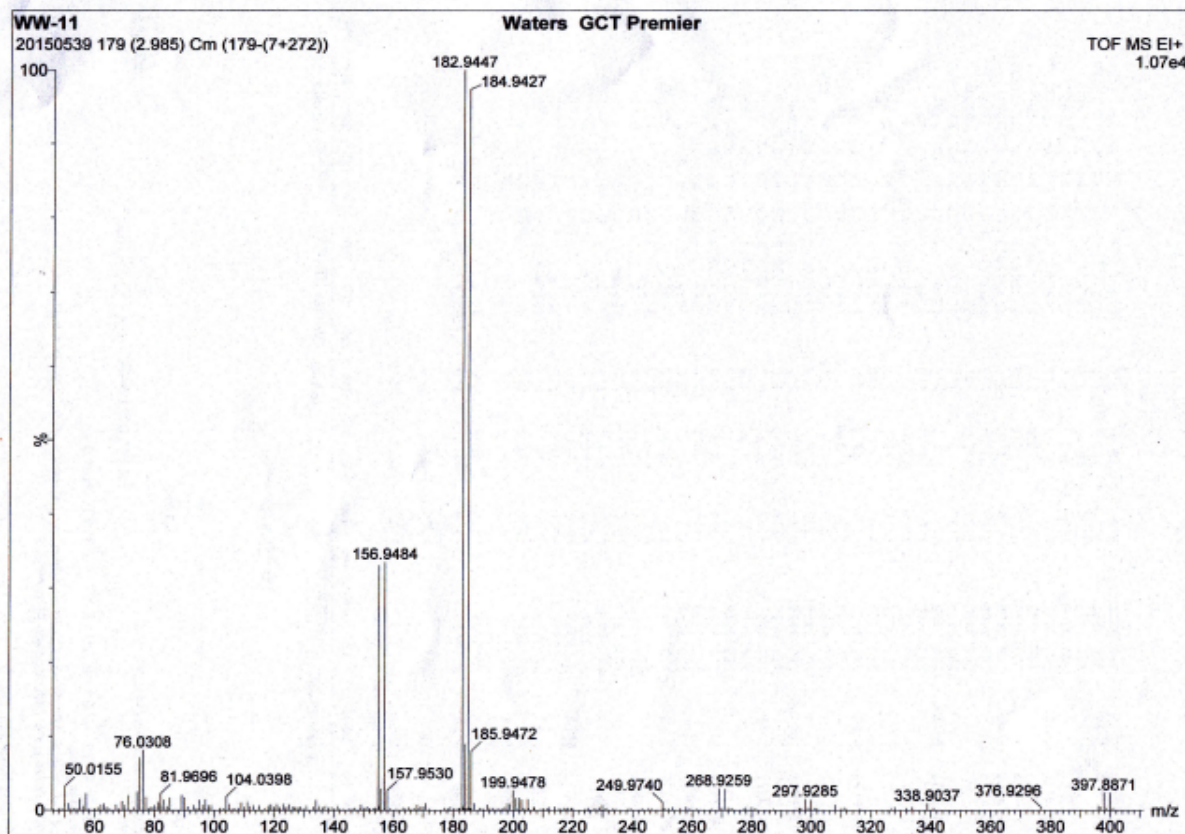

<sup>1</sup>H NMR spectra of 4

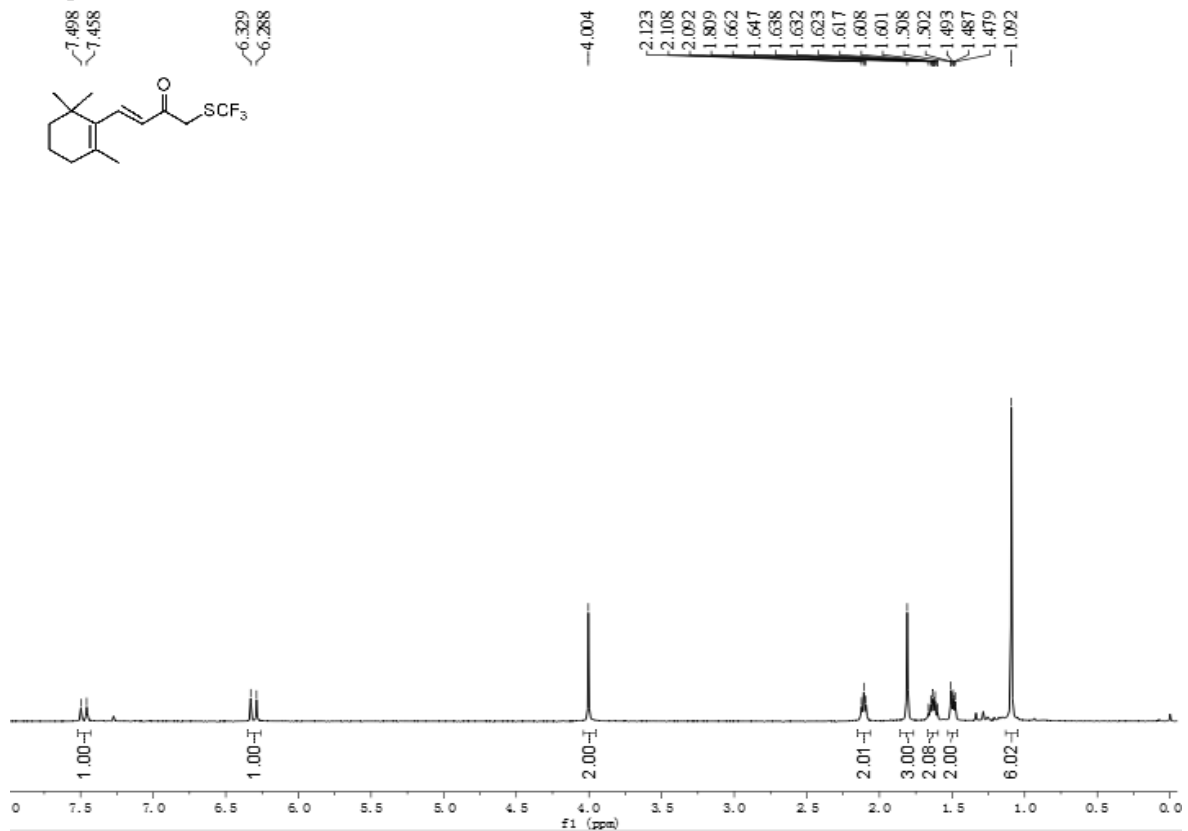

<sup>13</sup>C NMR spectra of 4

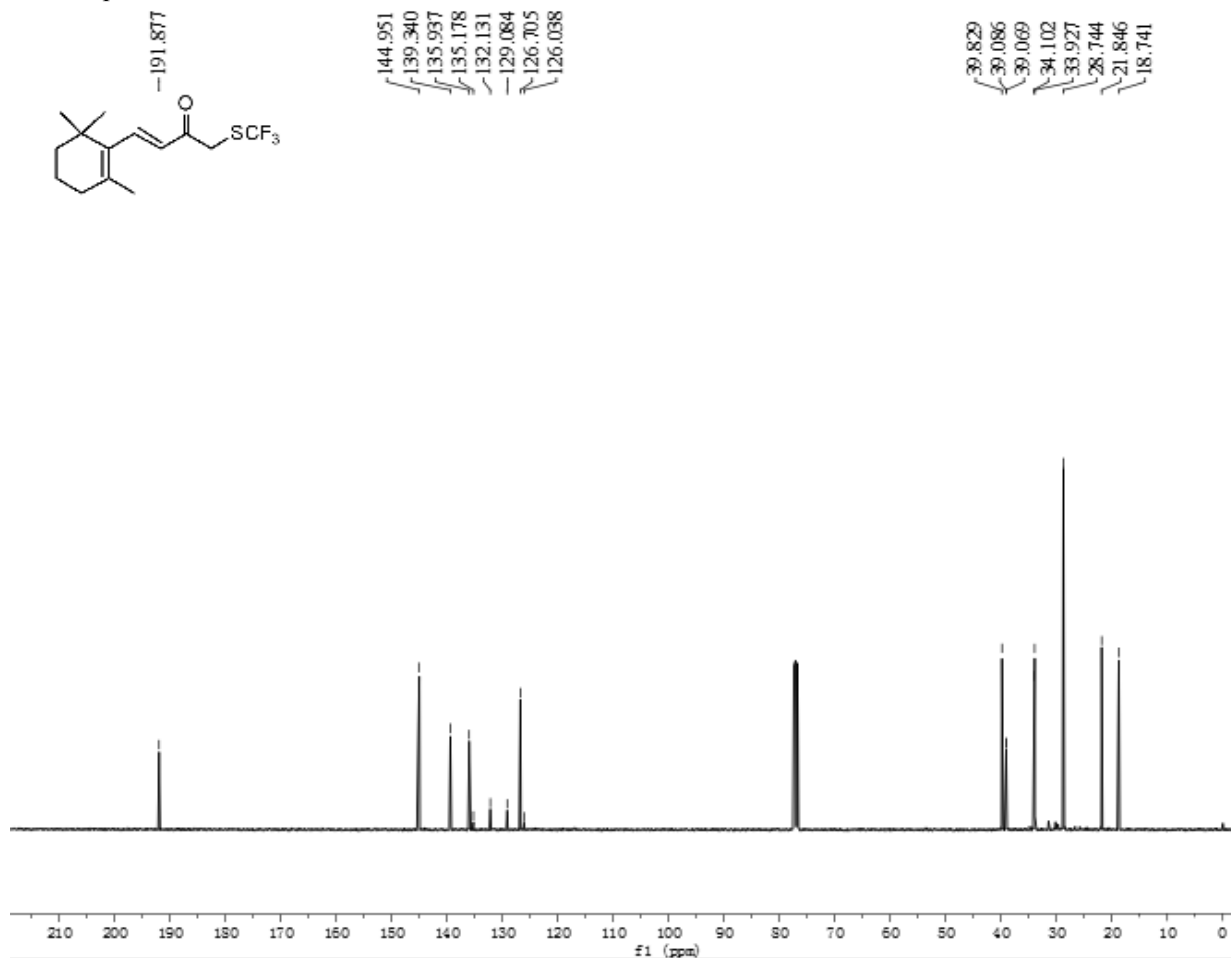



<sup>19</sup>F NMR spectra of **4**

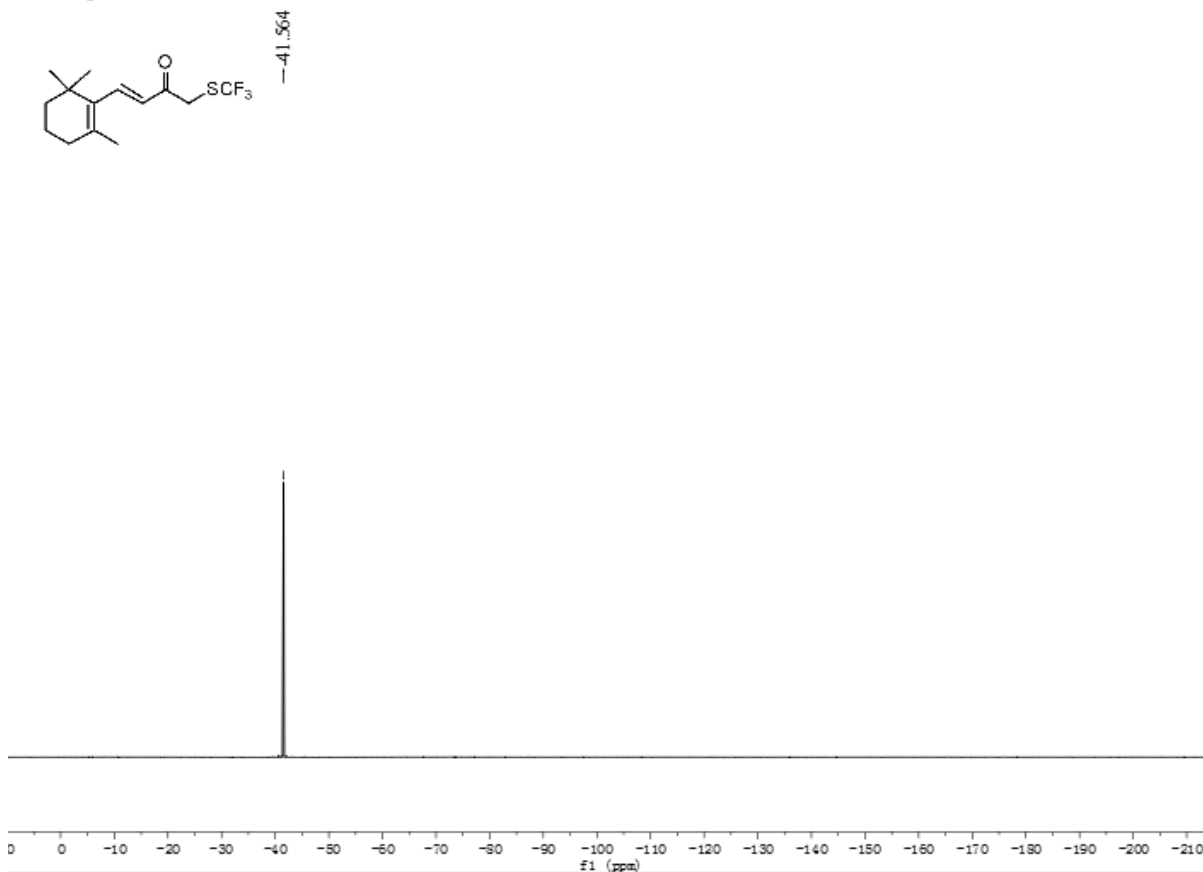

HRMS(EI) spectra of **4**

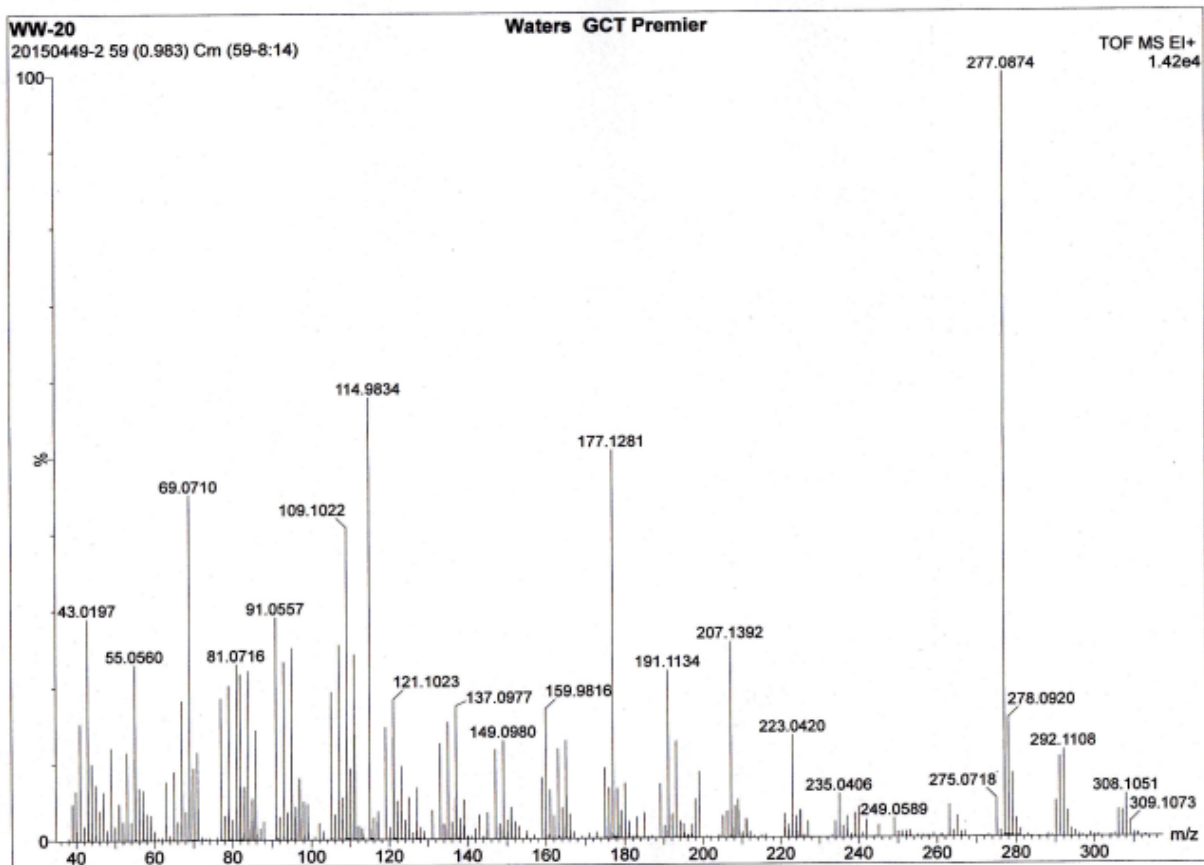

<sup>1</sup>H NMR spectra of **5**

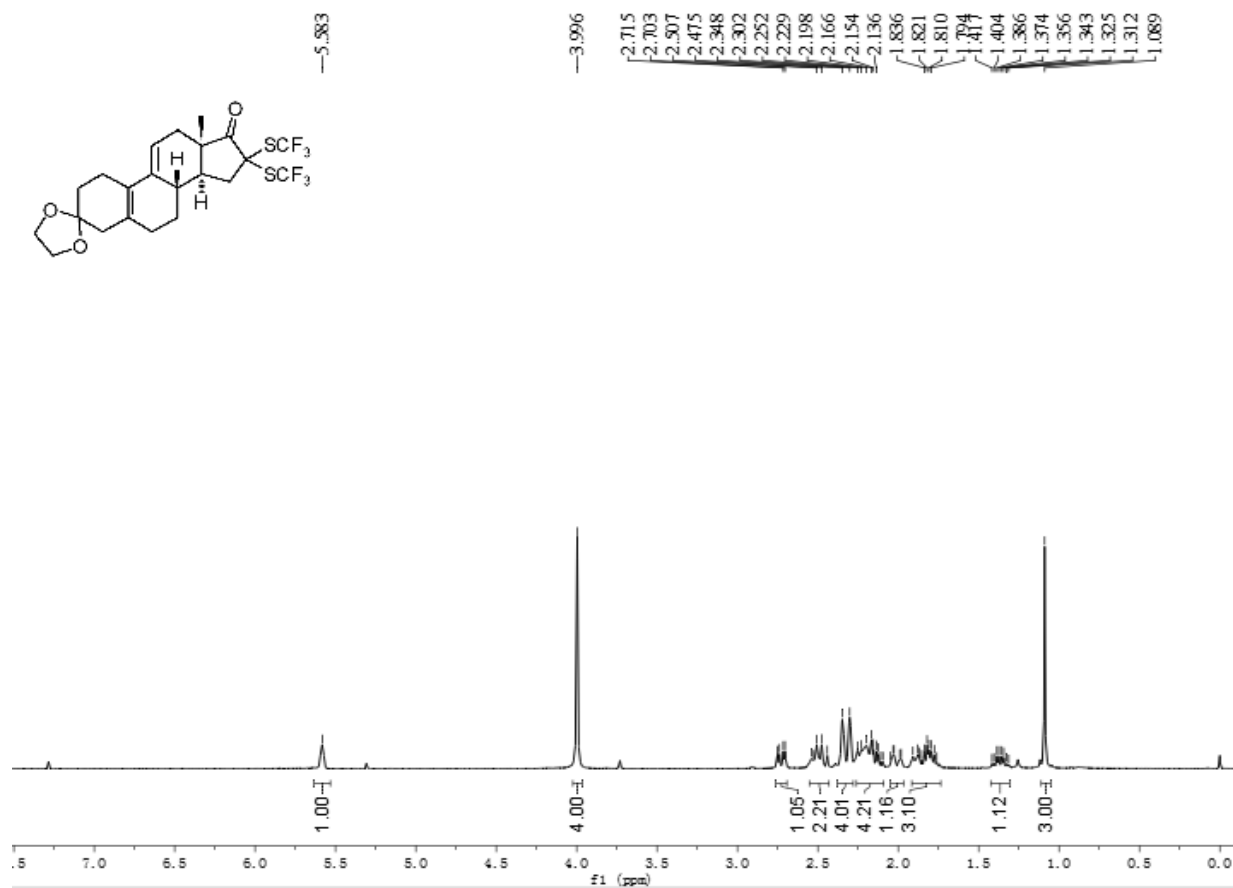

<sup>13</sup>C NMR spectra of **5**

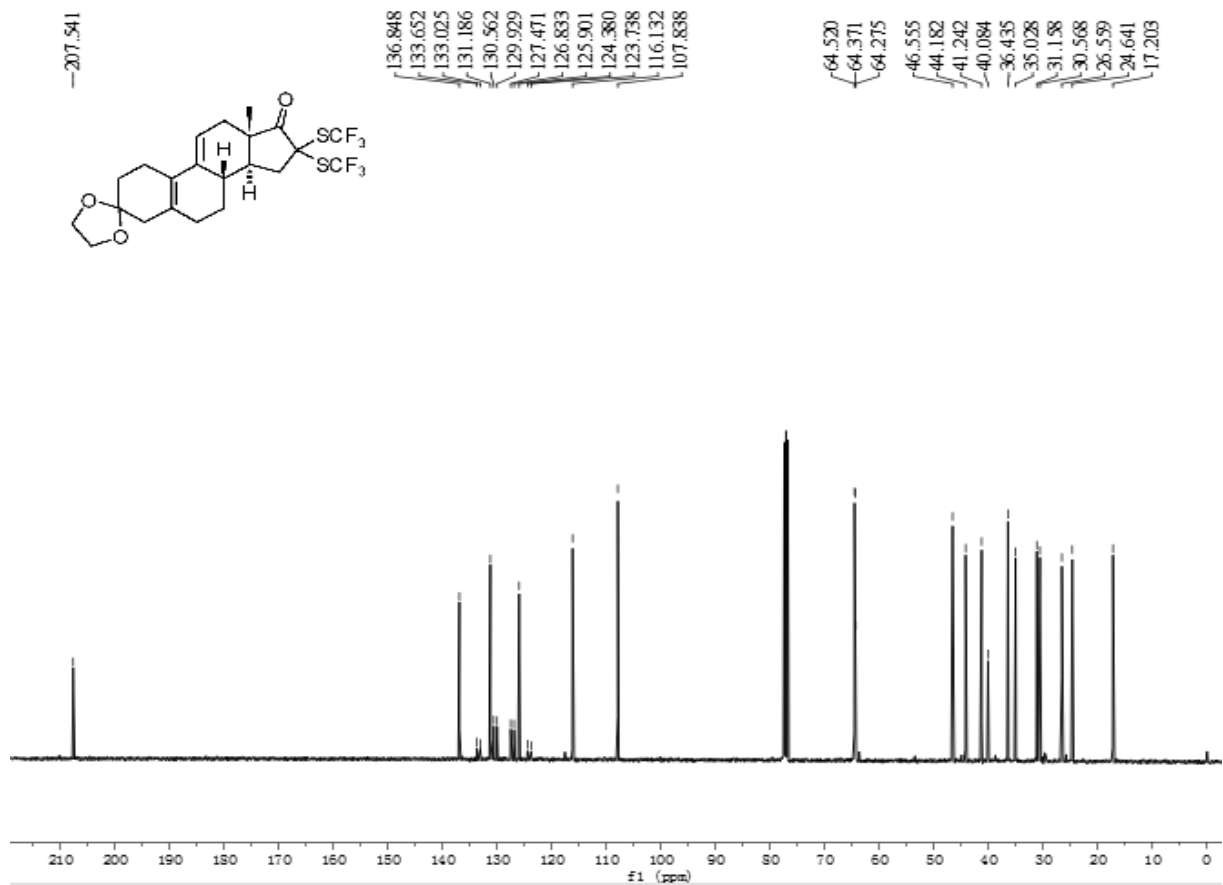

<sup>19</sup>F NMR spectra of **5**

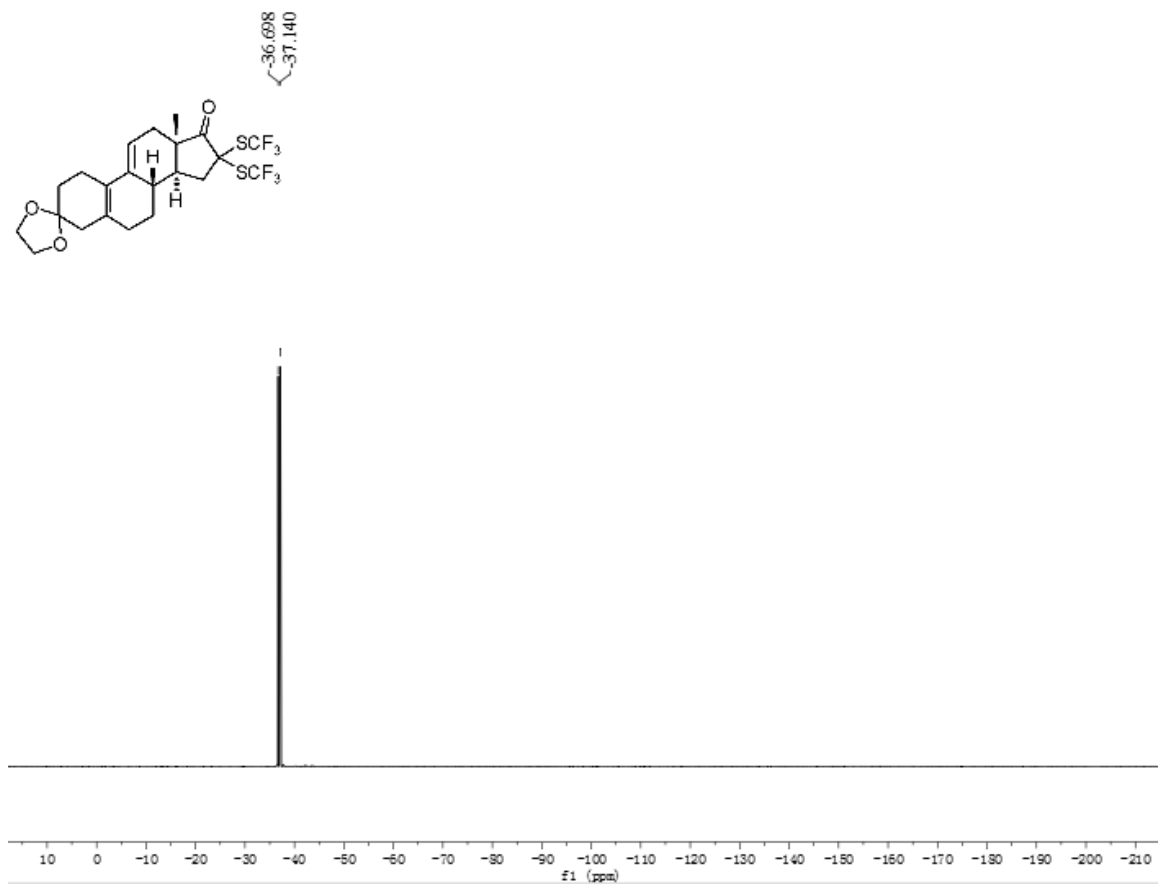

HRMS(EI) spectra of **5**

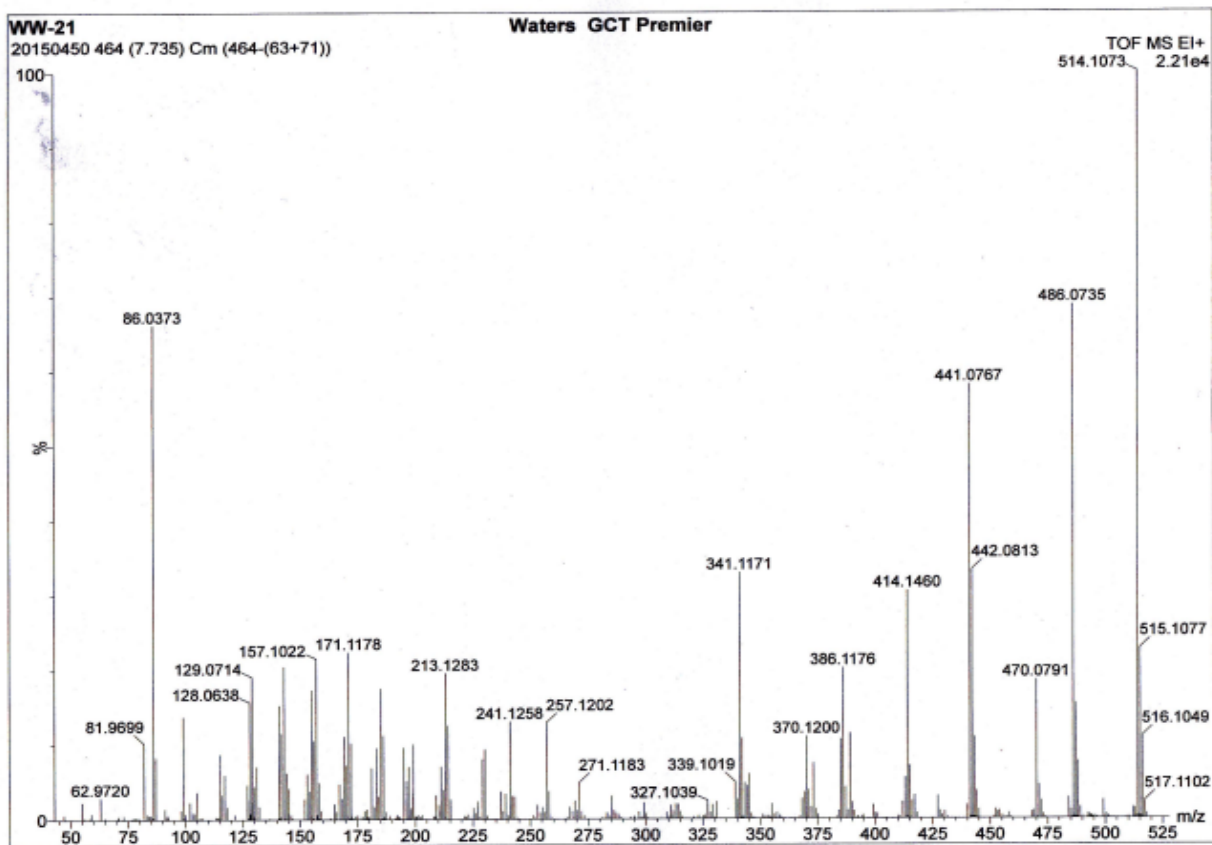

Supplement: c5ob00960j1.pdf [file c5ob00960j1.pdf]
